# Supplementary material for: Effect of ageing and single nucleotide polymorphisms associated with the risk of aggressive prostate cancer in a New Zealand population
Source: Royal Society of Chemistry journal article supplement (doi:10.1039/c7mb00203c), 2017-07-21
Supplement: c7mb00203c1.zip [file c7mb00203c1.zip]

## Sheet: BMI_Agg_vs_Control_OR
CHR	SNP	BP	A1	TEST	NMISS	OR	SE	L95	U95	STAT	P
1	rs5845	86863156	2	ADD	507	0.6726	0.2335	0.4256	1.063	-1.699	0.08931
1	rs5845	86863156	2	DOMDEV	507	1.306	0.2863	0.7451	2.289	0.9321	0.3513
1	rs5845	86863156	2	C2	507	0.5057	0.2351	0.319	0.8016	-2.9	0.003728
1	rs5845	86863156	2	GENO_2DF	507	NA	NA	NA	NA	3.001	0.223
1	rs12042763	186682744	2	ADD	481	1.017	0.2155	0.6664	1.551	0.07666	0.9389
1	rs12042763	186682744	2	DOMDEV	481	1.32	0.2657	0.784	2.221	1.044	0.2964
1	rs12042763	186682744	2	C2	481	0.5066	0.2265	0.325	0.7897	-3.002	0.002679
1	rs12042763	186682744	2	GENO_2DF	481	NA	NA	NA	NA	2.189	0.3347
1	rs1380576	204519150	4	ADD	115	0.7393	0.3407	0.3792	1.442	-0.8864	0.3754
1	rs1380576	204519150	4	DOMDEV	115	1.331	0.4426	0.5589	3.169	0.6458	0.5184
1	rs1380576	204519150	4	C2	115	0.5334	0.4168	0.2356	1.207	-1.508	0.1316
1	rs1380576	204519150	4	GENO_2DF	115	NA	NA	NA	NA	0.8396	0.6572
2	rs632148	31580962	4	ADD	506	1.572	0.2181	1.025	2.411	2.075	0.03795
2	rs632148	31580962	4	DOMDEV	506	0.6845	0.2649	0.4073	1.15	-1.431	0.1525
2	rs632148	31580962	4	C2	506	0.5182	0.2325	0.3285	0.8173	-2.828	0.004687
2	rs632148	31580962	4	GENO_2DF	506	NA	NA	NA	NA	4.315	0.1156
2	rs1056827	38075034	2	ADD	336	1.181	0.5338	0.4149	3.362	0.3116	0.7553
2	rs1056827	38075034	2	DOMDEV	336	0.8304	0.6462	0.234	2.947	-0.2875	0.7737
2	rs1056827	38075034	2	C2	336	1.109	0.4608	0.4493	2.735	0.2237	0.823
2	rs1056827	38075034	2	GENO_2DF	336	NA	NA	NA	NA	0.1063	0.9482
2	rs1465618	43326810	1	ADD	494	1.046	0.2475	0.6441	1.699	0.1824	0.8553
2	rs1465618	43326810	1	DOMDEV	494	0.9219	0.2972	0.5148	1.651	-0.2735	0.7845
2	rs1465618	43326810	1	C2	494	0.4551	0.2256	0.2924	0.7082	-3.489	0.0004849
2	rs1465618	43326810	1	GENO_2DF	494	NA	NA	NA	NA	0.07561	0.9629
2	rs721048	62904596	1	ADD	496	0.7986	0.2388	0.5001	1.275	-0.9417	0.3464
2	rs721048	62904596	1	DOMDEV	496	1.327	0.2903	0.7514	2.344	0.9753	0.3294
2	rs721048	62904596	1	C2	496	0.4866	0.2225	0.3146	0.7526	-3.238	0.001205
2	rs721048	62904596	1	GENO_2DF	496	NA	NA	NA	NA	1.067	0.5864
2	rs2710647	63213970	2	ADD	479	1.022	0.1405	0.7761	1.346	0.1562	0.8759
2	rs2710647	63213970	2	DOMDEV	479	0.9627	0.1935	0.6588	1.407	-0.1966	0.8441
2	rs2710647	63213970	2	C2	479	0.4669	0.2248	0.3005	0.7254	-3.388	0.0007047
2	rs2710647	63213970	2	GENO_2DF	479	NA	NA	NA	NA	0.05339	0.9737
2	rs10187424	85567174	4	ADD	530	1.121	0.1405	0.8508	1.476	0.8103	0.4178
2	rs10187424	85567174	4	DOMDEV	530	0.9301	0.1912	0.6395	1.353	-0.3791	0.7046
2	rs10187424	85567174	4	C2	530	0.4357	0.2215	0.2822	0.6726	-3.751	0.0001764
2	rs10187424	85567174	4	GENO_2DF	530	NA	NA	NA	NA	0.6868	0.7093
2	rs12621278	172446825	3	ADD	319	1.005e-05	12190	0	inf	-0.0009441	0.9992
2	rs12621278	172446825	3	DOMDEV	319	84230	12190	0	inf	0.0009304	0.9993
2	rs12621278	172446825	3	C2	319	0.5893	0.3242	0.3121	1.113	-1.631	0.1029
2	rs12621278	172446825	3	GENO_2DF	319	NA	NA	NA	NA	0.1665	0.9201
2	rs2292884	238443226	3	ADD	535	1.006	0.1821	0.7043	1.438	0.03453	0.9725
2	rs2292884	238443226	3	DOMDEV	535	0.9693	0.2291	0.6187	1.519	-0.136	0.8918
2	rs2292884	238443226	3	C2	535	0.4455	0.2219	0.2883	0.6882	-3.644	0.0002684
2	rs2292884	238443226	3	GENO_2DF	535	NA	NA	NA	NA	0.02172	0.9892
3	rs17793693	12345971	1	ADD	431	32730	12190	0	inf	0.0008529	0.9993
3	rs17793693	12345971	1	DOMDEV	431	0.0001365	12190	0	inf	-0.0007301	0.9994
3	rs17793693	12345971	1	C2	431	0.6236	0.2409	0.3889	0.9998	-1.961	0.0499
3	rs17793693	12345971	1	GENO_2DF	431	NA	NA	NA	NA	11.19	0.003717
3	rs4135275	12443844	3	ADD	478	1.426	0.2649	0.8481	2.396	1.338	0.1808
3	rs4135275	12443844	3	DOMDEV	478	0.7009	0.3131	0.3794	1.295	-1.135	0.2564
3	rs4135275	12443844	3	C2	478	0.4956	0.2258	0.3183	0.7714	-3.109	0.001876
3	rs4135275	12443844	3	GENO_2DF	478	NA	NA	NA	NA	1.824	0.4018
3	rs1799977	37012077	3	ADD	481	1.265	0.164	0.9174	1.745	1.434	0.1515
3	rs1799977	37012077	3	DOMDEV	481	1.006	0.2213	0.6522	1.553	0.02861	0.9772
3	rs1799977	37012077	3	C2	481	0.3998	0.2239	0.2578	0.6201	-4.093	4.25e-05
3	rs1799977	37012077	3	GENO_2DF	481	NA	NA	NA	NA	2.736	0.2546
3	rs1050450	49357401	2	ADD	514	0.8563	0.175	0.6077	1.207	-0.8865	0.3754
3	rs1050450	49357401	2	DOMDEV	514	1.034	0.2294	0.6593	1.621	0.1444	0.8852
3	rs1050450	49357401	2	C2	514	0.5283	0.2308	0.3361	0.8305	-2.765	0.005693
3	rs1050450	49357401	2	GENO_2DF	514	NA	NA	NA	NA	0.9114	0.634
3	rs10934853	128319530	1	ADD	479	1.145	0.1885	0.7913	1.657	0.7186	0.4724
3	rs10934853	128319530	1	DOMDEV	479	0.9084	0.2411	0.5663	1.457	-0.3986	0.6902
3	rs10934853	128319530	1	C2	479	0.4885	0.2256	0.3139	0.7601	-3.176	0.001493
3	rs10934853	128319530	1	GENO_2DF	479	NA	NA	NA	NA	0.5175	0.772
3	rs6763931	141383991	1	ADD	537	0.9282	0.1317	0.717	1.202	-0.5657	0.5716
3	rs6763931	141383991	1	DOMDEV	537	1.324	0.1867	0.9183	1.909	1.503	0.1327
3	rs6763931	141383991	1	C2	537	0.4626	0.2205	0.3002	0.7127	-3.496	0.0004724
3	rs6763931	141383991	1	GENO_2DF	537	NA	NA	NA	NA	2.343	0.3099
4	rs629242	56276871	2	ADD	483	1.413	0.2486	0.868	2.3	1.391	0.1644
4	rs629242	56276871	2	DOMDEV	483	0.7262	0.2958	0.4067	1.297	-1.082	0.2794
4	rs629242	56276871	2	C2	483	0.4575	0.2256	0.294	0.712	-3.466	0.0005285
4	rs629242	56276871	2	GENO_2DF	483	NA	NA	NA	NA	1.94	0.3791
4	rs12500426	94593458	1	ADD	479	1.001	0.1317	0.7733	1.296	0.00709	0.9943
4	rs12500426	94593458	1	DOMDEV	479	1.403	0.1931	0.9609	2.048	1.753	0.07955
4	rs12500426	94593458	1	C2	479	0.4805	0.2277	0.3076	0.7507	-3.219	0.001285
4	rs12500426	94593458	1	GENO_2DF	479	NA	NA	NA	NA	3.108	0.2114
4	rs17021918	94641726	2	ADD	494	1.052	0.153	0.7796	1.42	0.3324	0.7396
4	rs17021918	94641726	2	DOMDEV	494	1.236	0.2081	0.8221	1.859	1.019	0.3084
4	rs17021918	94641726	2	C2	494	0.4829	0.2243	0.3111	0.7496	-3.245	0.001174
4	rs17021918	94641726	2	GENO_2DF	494	NA	NA	NA	NA	1.74	0.419
4	rs7679673	105140377	1	ADD	474	1.085	0.1723	0.7739	1.521	0.4729	0.6363
4	rs7679673	105140377	1	DOMDEV	474	0.8216	0.2188	0.5351	1.262	-0.8978	0.3693
4	rs7679673	105140377	1	C2	474	0.4947	0.2283	0.3163	0.7739	-3.083	0.002051
4	rs7679673	105140377	1	GENO_2DF	474	NA	NA	NA	NA	0.8085	0.6675
5	rs2242652	1279913	2	ADD	539	0.9172	0.2417	0.5711	1.473	-0.3576	0.7206
5	rs2242652	1279913	2	DOMDEV	539	1.695	0.3011	0.9396	3.059	1.753	0.07957
5	rs2242652	1279913	2	C2	539	0.4564	0.2219	0.2954	0.7051	-3.534	0.0004093
5	rs2242652	1279913	2	GENO_2DF	539	NA	NA	NA	NA	4.777	0.09178
5	rs3877899	42801166	1	ADD	516	0.9003	0.2069	0.6001	1.351	-0.5076	0.6117
5	rs3877899	42801166	1	DOMDEV	516	1.296	0.267	0.768	2.187	0.9714	0.3313
5	rs3877899	42801166	1	C2	516	0.5227	0.2309	0.3325	0.8219	-2.81	0.004961
5	rs3877899	42801166	1	GENO_2DF	516	NA	NA	NA	NA	0.9615	0.6183
5	rs2121875	44365443	3	ADD	519	0.9326	0.1341	0.7171	1.213	-0.5209	0.6025
5	rs2121875	44365443	3	DOMDEV	519	1.046	0.1971	0.7106	1.539	0.2268	0.8206
5	rs2121875	44365443	3	C2	519	0.4765	0.2239	0.3073	0.739	-3.311	0.000929
5	rs2121875	44365443	3	GENO_2DF	519	NA	NA	NA	NA	0.2772	0.8706
5	rs3733890	79126136	1	ADD	494	1.163	0.1817	0.8145	1.661	0.831	0.406
5	rs3733890	79126136	1	DOMDEV	494	0.7351	0.2308	0.4676	1.156	-1.333	0.1825
5	rs3733890	79126136	1	C2	494	0.4526	0.2266	0.2903	0.7058	-3.497	0.0004696
5	rs3733890	79126136	1	GENO_2DF	494	NA	NA	NA	NA	1.785	0.4096
6	rs130067	31150734	4	ADD	520	0.6491	0.2121	0.4283	0.9836	-2.038	0.04157
6	rs130067	31150734	4	DOMDEV	520	1.221	0.2669	0.7239	2.061	0.7491	0.4538
6	rs130067	31150734	4	C2	520	0.4499	0.2262	0.2888	0.7008	-3.532	0.0004128
6	rs130067	31150734	4	GENO_2DF	520	NA	NA	NA	NA	4.854	0.08831
6	rs4880	159692840	2	ADD	518	1.077	0.1391	0.8197	1.414	0.5311	0.5953
6	rs4880	159692840	2	DOMDEV	518	0.9139	0.1958	0.6226	1.341	-0.46	0.6455
6	rs4880	159692840	2	C2	518	0.5304	0.2304	0.3377	0.833	-2.753	0.005902
6	rs4880	159692840	2	GENO_2DF	518	NA	NA	NA	NA	0.4771	0.7878
7	rs12155172	20954872	1	ADD	476	0.9517	0.2347	0.6008	1.508	-0.2107	0.8331
7	rs12155172	20954872	1	DOMDEV	476	1.208	0.2859	0.6898	2.115	0.6608	0.5087
7	rs12155172	20954872	1	C2	476	0.4672	0.2307	0.2972	0.7343	-3.299	0.0009709
7	rs12155172	20954872	1	GENO_2DF	476	NA	NA	NA	NA	0.5674	0.753
7	rs10486567	27936944	1	ADD	544	0.7689	0.2278	0.492	1.202	-1.153	0.2488
7	rs10486567	27936944	1	DOMDEV	544	0.913	0.2728	0.5349	1.558	-0.3338	0.7385
7	rs10486567	27936944	1	C2	544	0.4065	0.2264	0.2608	0.6335	-3.976	7e-05
7	rs10486567	27936944	1	GENO_2DF	544	NA	NA	NA	NA	4.054	0.1317
7	rs6465657	98187015	4	ADD	480	0.9003	0.1385	0.6862	1.181	-0.7581	0.4484
7	rs6465657	98187015	4	DOMDEV	480	0.861	0.1916	0.5914	1.254	-0.7808	0.4349
7	rs6465657	98187015	4	C2	480	0.4807	0.2255	0.309	0.7478	-3.249	0.00116
7	rs6465657	98187015	4	GENO_2DF	480	NA	NA	NA	NA	1.296	0.5231
7	rs10244329	128248636	2	ADD	321	1.59	0.2094	1.055	2.396	2.215	0.02679
7	rs10244329	128248636	2	DOMDEV	321	0.8017	0.2851	0.4585	1.402	-0.7755	0.438
7	rs10244329	128248636	2	C2	321	0.557	0.317	0.2992	1.037	-1.846	0.06486
7	rs10244329	128248636	2	GENO_2DF	321	NA	NA	NA	NA	4.978	0.08298
7	rs3735035	131195959	2	ADD	472	1.005	0.139	0.7652	1.32	0.03523	0.9719
7	rs3735035	131195959	2	DOMDEV	472	1.219	0.1943	0.8331	1.784	1.02	0.3077
7	rs3735035	131195959	2	C2	472	0.4472	0.2313	0.2842	0.7036	-3.48	0.0005011
7	rs3735035	131195959	2	GENO_2DF	472	NA	NA	NA	NA	1.058	0.5892
8	rs2928679	23438975	2	ADD	488	1.178	0.1374	0.8999	1.542	1.192	0.2331
8	rs2928679	23438975	2	DOMDEV	488	0.8665	0.1896	0.5975	1.257	-0.7554	0.45
8	rs2928679	23438975	2	C2	488	0.497	0.2232	0.3209	0.7697	-3.133	0.00173
8	rs2928679	23438975	2	GENO_2DF	488	NA	NA	NA	NA	1.822	0.4021
8	rs1512268	23668950	1	ADD	478	0.9138	0.1443	0.6887	1.213	-0.6246	0.5322
8	rs1512268	23668950	1	DOMDEV	478	0.9405	0.1981	0.6378	1.387	-0.3096	0.7569
8	rs1512268	23668950	1	C2	478	0.4751	0.2273	0.3043	0.7418	-3.274	0.00106
8	rs1512268	23668950	1	GENO_2DF	478	NA	NA	NA	NA	0.633	0.7287
8	rs1016343	127081052	2	ADD	457	0.8752	0.2069	0.5834	1.313	-0.6444	0.5193
8	rs1016343	127081052	2	DOMDEV	457	1.487	0.2704	0.8753	2.526	1.467	0.1423
8	rs1016343	127081052	2	C2	457	0.4402	0.2386	0.2758	0.7027	-3.439	0.0005848
8	rs1016343	127081052	2	GENO_2DF	457	NA	NA	NA	NA	2.279	0.32
8	rs13254738	127092098	4	ADD	483	1.016	0.1668	0.7328	1.409	0.09547	0.9239
8	rs13254738	127092098	4	DOMDEV	483	0.9917	0.2202	0.6441	1.527	-0.03787	0.9698
8	rs13254738	127092098	4	C2	483	0.4873	0.2254	0.3133	0.758	-3.189	0.001428
8	rs13254738	127092098	4	GENO_2DF	483	NA	NA	NA	NA	0.009226	0.9954
8	rs6983561	127094635	4	ADD	486	1.352e-05	12190	0	inf	-0.0009198	0.9993
8	rs6983561	127094635	4	DOMDEV	486	33330	12190	0	inf	0.0008544	0.9993
8	rs6983561	127094635	4	C2	486	0.416	0.2327	0.2636	0.6564	-3.769	0.0001638
8	rs6983561	127094635	4	GENO_2DF	486	NA	NA	NA	NA	6.152	0.04615
8	rs1378897	127110414	1	ADD	485	NA	NA	NA	NA	NA	NA
8	rs1378897	127110414	1	DOMDEV	485	NA	NA	NA	NA	NA	NA
8	rs1378897	127110414	1	C2	485	NA	NA	NA	NA	NA	NA
8	rs1378897	127110414	1	GENO_2DF	485	NA	NA	NA	NA	NA	NA
8	rs16902094	127308101	3	ADD	486	1.198	0.3526	0.6001	2.39	0.5117	0.6089
8	rs16902094	127308101	3	DOMDEV	486	0.831	0.4002	0.3793	1.821	-0.4625	0.6437
8	rs16902094	127308101	3	C2	486	0.5004	0.2255	0.3216	0.7785	-3.07	0.002139
8	rs16902094	127308101	3	GENO_2DF	486	NA	NA	NA	NA	0.2657	0.8756
8	rs6983267	127401060	2	ADD	493	1.213	0.1376	0.9266	1.589	1.406	0.1599
8	rs6983267	127401060	2	DOMDEV	493	1.304	0.1906	0.8972	1.894	1.391	0.1643
8	rs6983267	127401060	2	C2	493	0.4838	0.2255	0.311	0.7526	-3.221	0.001279
8	rs6983267	127401060	2	GENO_2DF	493	NA	NA	NA	NA	4.596	0.1005
8	rs7000448	127428925	2	ADD	477	1.037	0.1516	0.7703	1.395	0.2383	0.8116
8	rs7000448	127428925	2	DOMDEV	477	1.164	0.2057	0.7781	1.742	0.74	0.4593
8	rs7000448	127428925	2	C2	477	0.4921	0.2258	0.3162	0.7661	-3.14	0.001688
8	rs7000448	127428925	2	GENO_2DF	477	NA	NA	NA	NA	0.8513	0.6534
8	rs6470517	127448159	3	ADD	456	1.247	0.4251	0.5422	2.87	0.5199	0.6032
8	rs6470517	127448159	3	DOMDEV	456	0.6639	0.4648	0.267	1.651	-0.8815	0.3781
8	rs6470517	127448159	3	C2	456	0.4526	0.2382	0.2838	0.7219	-3.328	0.0008732
8	rs6470517	127448159	3	GENO_2DF	456	NA	NA	NA	NA	1.065	0.5871
8	rs6470494	128087904	2	ADD	483	1.09	0.1653	0.788	1.506	0.5187	0.604
8	rs6470494	128087904	2	DOMDEV	483	0.8283	0.2213	0.5368	1.278	-0.8512	0.3946
8	rs6470494	128087904	2	C2	483	0.4931	0.2233	0.3183	0.7639	-3.166	0.001545
8	rs6470494	128087904	2	GENO_2DF	483	NA	NA	NA	NA	0.7369	0.6918
8	rs2294008	142680513	2	ADD	479	1.057	0.1404	0.8027	1.392	0.3947	0.6931
8	rs2294008	142680513	2	DOMDEV	479	1.149	0.196	0.7824	1.687	0.7079	0.479
8	rs2294008	142680513	2	C2	479	0.4412	0.231	0.2806	0.6938	-3.543	0.000396
8	rs2294008	142680513	2	GENO_2DF	479	NA	NA	NA	NA	0.821	0.6633
9	rs11536889	117715853	4	ADD	486	1.119	0.279	0.6478	1.934	0.4038	0.6864
9	rs11536889	117715853	4	DOMDEV	486	0.7057	0.3344	0.3664	1.359	-1.042	0.2972
9	rs11536889	117715853	4	C2	486	0.4485	0.2278	0.287	0.7009	-3.52	0.0004317
9	rs11536889	117715853	4	GENO_2DF	486	NA	NA	NA	NA	1.459	0.4822
10	rs12529	5136651	3	ADD	538	0.7925	0.1285	0.6161	1.02	-1.809	0.07041
10	rs12529	5136651	3	DOMDEV	538	1.222	0.1911	0.8401	1.777	1.048	0.2946
10	rs12529	5136651	3	C2	538	0.4389	0.2222	0.284	0.6784	-3.706	0.0002103
10	rs12529	5136651	3	GENO_2DF	538	NA	NA	NA	NA	3.682	0.1586
10	rs10740051	46025670	1	ADD	479	1.191	0.1954	0.8119	1.747	0.8938	0.3714
10	rs10740051	46025670	1	DOMDEV	479	0.827	0.2454	0.5112	1.338	-0.7742	0.4388
10	rs10740051	46025670	1	C2	479	0.4633	0.227	0.2969	0.7229	-3.389	0.0007008
10	rs10740051	46025670	1	GENO_2DF	479	NA	NA	NA	NA	0.8806	0.6438
10	rs7920517	46063201	3	ADD	473	0.6812	0.1379	0.5199	0.8926	-2.784	0.005373
10	rs7920517	46063201	3	DOMDEV	473	1.041	0.1937	0.7124	1.522	0.209	0.8345
10	rs7920517	46063201	3	C2	473	0.4555	0.2307	0.2898	0.716	-3.408	0.0006554
10	rs7920517	46063201	3	GENO_2DF	473	NA	NA	NA	NA	7.751	0.02074
10	rs6162	102837224	1	ADD	538	1.109	0.1397	0.8437	1.459	0.7428	0.4576
10	rs6162	102837224	1	DOMDEV	538	0.9003	0.1932	0.6166	1.315	-0.5434	0.5868
10	rs6162	102837224	1	C2	538	0.4642	0.2183	0.3026	0.712	-3.516	0.0004384
10	rs6162	102837224	1	GENO_2DF	538	NA	NA	NA	NA	0.6541	0.721
10	rs4962416	125008303	4	ADD	551	1.064	0.2015	0.7166	1.579	0.3062	0.7595
10	rs4962416	125008303	4	DOMDEV	551	0.7678	0.2452	0.4748	1.241	-1.078	0.2811
10	rs4962416	125008303	4	C2	551	0.4604	0.2183	0.3001	0.7063	-3.552	0.0003817
10	rs4962416	125008303	4	GENO_2DF	551	NA	NA	NA	NA	1.456	0.4829
11	rs7127900	2212344	1	ADD	485	0.9391	0.1856	0.6527	1.351	-0.3385	0.735
11	rs7127900	2212344	1	DOMDEV	485	1.056	0.2459	0.6523	1.71	0.2222	0.8241
11	rs7127900	2212344	1	C2	485	0.4828	0.2251	0.3106	0.7505	-3.235	0.001216
11	rs7127900	2212344	1	GENO_2DF	485	NA	NA	NA	NA	0.1154	0.9439
11	rs1001179	34438684	2	ADD	512	0.7215	0.2352	0.455	1.144	-1.388	0.1653
11	rs1001179	34438684	2	DOMDEV	512	1.34	0.2862	0.7646	2.348	1.022	0.3067
11	rs1001179	34438684	2	C2	512	0.534	0.2313	0.3394	0.8404	-2.712	0.006692
11	rs1001179	34438684	2	GENO_2DF	512	NA	NA	NA	NA	1.93	0.3809
11	rs594519	56305228	2	ADD	481	1.08	0.2168	0.7059	1.651	0.3535	0.7237
11	rs594519	56305228	2	DOMDEV	481	0.8172	0.2749	0.4768	1.401	-0.7343	0.4628
11	rs594519	56305228	2	C2	481	0.4672	0.2248	0.3007	0.7259	-3.385	0.0007126
11	rs594519	56305228	2	GENO_2DF	481	NA	NA	NA	NA	0.5736	0.7507
11	rs2727270	61603237	2	ADD	490	0.3769	0.5931	0.1179	1.205	-1.645	0.09992
11	rs2727270	61603237	2	DOMDEV	490	1.894	0.6292	0.5519	6.501	1.015	0.31
11	rs2727270	61603237	2	C2	490	0.389	0.2265	0.2495	0.6064	-4.168	3.068e-05
11	rs2727270	61603237	2	GENO_2DF	490	NA	NA	NA	NA	4.578	0.1014
11	rs174448	61872101	4	ADD	539	1.024	0.1472	0.7675	1.367	0.1622	0.8712
11	rs174448	61872101	4	DOMDEV	539	0.857	0.1968	0.5828	1.26	-0.7845	0.4328
11	rs174448	61872101	4	C2	539	0.4484	0.222	0.2902	0.6928	-3.613	0.0003027
11	rs174448	61872101	4	GENO_2DF	539	NA	NA	NA	NA	0.6349	0.728
11	rs10896438	69139102	3	ADD	540	0.6325	0.1415	0.4793	0.8348	-3.236	0.001213
11	rs10896438	69139102	3	DOMDEV	540	1.195	0.1993	0.8083	1.766	0.8926	0.3721
11	rs10896438	69139102	3	C2	540	0.4438	0.222	0.2872	0.6858	-3.659	0.0002534
11	rs10896438	69139102	3	GENO_2DF	540	NA	NA	NA	NA	10.55	0.00511
11	rs11228565	69211113	1	ADD	492	0.544	0.2592	0.3273	0.9043	-2.348	0.01887
11	rs11228565	69211113	1	DOMDEV	492	1.368	0.304	0.754	2.483	1.031	0.3024
11	rs11228565	69211113	1	C2	492	0.4681	0.2263	0.3004	0.7295	-3.354	0.0007977
11	rs11228565	69211113	1	GENO_2DF	492	NA	NA	NA	NA	6.861	0.03237
11	rs7931342	69227030	2	ADD	486	1.682	0.1408	1.276	2.216	3.692	0.0002222
11	rs7931342	69227030	2	DOMDEV	486	0.9981	0.1933	0.6834	1.458	-0.009689	0.9923
11	rs7931342	69227030	2	C2	486	0.4513	0.2298	0.2876	0.708	-3.462	0.0005355
11	rs7931342	69227030	2	GENO_2DF	486	NA	NA	NA	NA	13.78	0.001018
12	rs3782905	47872384	3	ADD	449	0.9341	0.1643	0.6769	1.289	-0.4152	0.678
12	rs3782905	47872384	3	DOMDEV	449	1.611	0.2275	1.031	2.516	2.096	0.03608
12	rs3782905	47872384	3	C2	449	0.541	0.2322	0.3432	0.8528	-2.646	0.008151
12	rs3782905	47872384	3	GENO_2DF	449	NA	NA	NA	NA	4.718	0.0945
12	rs7299460	48296268	2	ADD	452	1.184	0.173	0.8438	1.662	0.9778	0.3282
12	rs7299460	48296268	2	DOMDEV	452	0.8091	0.2292	0.5163	1.268	-0.9246	0.3552
12	rs7299460	48296268	2	C2	452	0.4338	0.2381	0.272	0.6917	-3.508	0.0004517
12	rs7299460	48296268	2	GENO_2DF	452	NA	NA	NA	NA	1.221	0.5432
12	rs6823	48362412	3	ADD	478	1.192	0.1374	0.9108	1.561	1.28	0.2006
12	rs6823	48362412	3	DOMDEV	478	0.9848	0.193	0.6747	1.438	-0.07919	0.9369
12	rs6823	48362412	3	C2	478	0.4773	0.2275	0.3056	0.7455	-3.251	0.001149
12	rs6823	48362412	3	GENO_2DF	478	NA	NA	NA	NA	1.647	0.4389
12	rs2071358	48366449	1	ADD	480	1.399	0.3396	0.7188	2.722	0.988	0.3232
12	rs2071358	48366449	1	DOMDEV	480	0.4332	0.3914	0.2012	0.9328	-2.138	0.03254
12	rs2071358	48366449	1	C2	480	0.4273	0.2311	0.2716	0.672	-3.68	0.0002335
12	rs2071358	48366449	1	GENO_2DF	480	NA	NA	NA	NA	6.413	0.0405
12	rs10875943	49282227	4	ADD	513	1.063	0.1766	0.7517	1.502	0.3441	0.7308
12	rs10875943	49282227	4	DOMDEV	513	0.7395	0.2264	0.4745	1.152	-1.333	0.1825
12	rs10875943	49282227	4	C2	513	0.4268	0.2231	0.2756	0.661	-3.815	0.0001359
12	rs10875943	49282227	4	GENO_2DF	513	NA	NA	NA	NA	2.007	0.3667
12	rs902774	52880120	1	ADD	494	0.7406	0.3867	0.3471	1.58	-0.7767	0.4373
12	rs902774	52880120	1	DOMDEV	494	1.234	0.4284	0.533	2.858	0.4911	0.6234
12	rs902774	52880120	1	C2	494	0.464	0.2262	0.2979	0.7229	-3.395	0.0006865
12	rs902774	52880120	1	GENO_2DF	494	NA	NA	NA	NA	0.7346	0.6926
12	rs2279744	68808800	3	ADD	464	0.9991	0.1487	0.7465	1.337	-0.005981	0.9952
12	rs2279744	68808800	3	DOMDEV	464	1.152	0.2129	0.7592	1.749	0.6659	0.5054
12	rs2279744	68808800	3	C2	464	0.4364	0.2318	0.277	0.6873	-3.577	0.0003469
12	rs2279744	68808800	3	GENO_2DF	464	NA	NA	NA	NA	0.51	0.7749
12	rs2946834	102394036	2	ADD	535	1.153	0.1693	0.8271	1.606	0.8387	0.4017
12	rs2946834	102394036	2	DOMDEV	535	0.8317	0.2199	0.5405	1.28	-0.8377	0.4022
12	rs2946834	102394036	2	C2	535	0.4431	0.2216	0.287	0.6841	-3.673	0.0002394
12	rs2946834	102394036	2	GENO_2DF	535	NA	NA	NA	NA	0.9139	0.6332
12	rs7965399	102497908	4	ADD	515	NA	NA	NA	NA	NA	NA
12	rs7965399	102497908	4	DOMDEV	515	NA	NA	NA	NA	NA	NA
12	rs7965399	102497908	4	C2	515	NA	NA	NA	NA	NA	NA
12	rs7965399	102497908	4	GENO_2DF	515	NA	NA	NA	NA	NA	NA
15	rs28665122	101277522	1	ADD	497	1.305	0.402	0.5936	2.869	0.6623	0.5078
15	rs28665122	101277522	1	DOMDEV	497	1.162	0.4656	0.4666	2.895	0.323	0.7467
15	rs28665122	101277522	1	C2	497	0.5323	0.2352	0.3357	0.8441	-2.681	0.00735
15	rs28665122	101277522	1	GENO_2DF	497	NA	NA	NA	NA	2.899	0.2347
15	rs4965373	101812395	1	ADD	517	1.101	0.1638	0.7989	1.518	0.5891	0.5558
15	rs4965373	101812395	1	DOMDEV	517	0.9997	0.2234	0.6452	1.549	-0.001316	0.9989
15	rs4965373	101812395	1	C2	517	0.5244	0.2308	0.3336	0.8245	-2.796	0.005172
15	rs4965373	101812395	1	GENO_2DF	517	NA	NA	NA	NA	0.4373	0.8036
16	rs1529916	8897333	2	ADD	475	1.255	0.1674	0.904	1.743	1.357	0.1748
16	rs1529916	8897333	2	DOMDEV	475	0.8506	0.2241	0.5482	1.32	-0.7219	0.4704
16	rs1529916	8897333	2	C2	475	0.4736	0.2289	0.3024	0.7418	-3.265	0.001095
16	rs1529916	8897333	2	GENO_2DF	475	NA	NA	NA	NA	1.845	0.3976
16	rs9939609	53786615	1	ADD	484	0.8862	0.1498	0.6607	1.189	-0.806	0.4202
16	rs9939609	53786615	1	DOMDEV	484	0.6921	0.202	0.4658	1.028	-1.822	0.0685
16	rs9939609	53786615	1	C2	484	0.4692	0.2261	0.3013	0.7308	-3.347	0.0008163
16	rs9939609	53786615	1	GENO_2DF	484	NA	NA	NA	NA	5.583	0.06132
17	rs11545302	12899963	3	ADD	388	1.054	0.1969	0.7164	1.55	0.2663	0.79
17	rs11545302	12899963	3	DOMDEV	388	0.7543	0.2516	0.4607	1.235	-1.121	0.2623
17	rs11545302	12899963	3	C2	388	0.296	0.239	0.1853	0.4729	-5.093	3.529e-07
17	rs11545302	12899963	3	GENO_2DF	388	NA	NA	NA	NA	1.414	0.4931
17	rs17552022	12994978	4	ADD	525	1.358	0.5843	0.4321	4.27	0.5241	0.6002
17	rs17552022	12994978	4	DOMDEV	525	0.8628	0.6165	0.2577	2.889	-0.2393	0.8109
17	rs17552022	12994978	4	C2	525	0.4702	0.2209	0.305	0.725	-3.416	0.0006347
17	rs17552022	12994978	4	GENO_2DF	525	NA	NA	NA	NA	0.7538	0.686
17	rs4054823	13721707	4	ADD	485	0.8378	0.1352	0.6429	1.092	-1.309	0.1906
17	rs4054823	13721707	4	DOMDEV	485	1.29	0.1924	0.8847	1.881	1.323	0.1857
17	rs4054823	13721707	4	C2	485	0.47	0.2253	0.3022	0.731	-3.351	0.0008065
17	rs4054823	13721707	4	GENO_2DF	485	NA	NA	NA	NA	2.972	0.2263
17	rs3094509	37702294	2	ADD	534	0.9848	0.1505	0.7332	1.323	-0.1016	0.919
17	rs3094509	37702294	2	DOMDEV	534	1.158	0.2031	0.7779	1.725	0.7235	0.4694
17	rs3094509	37702294	2	C2	534	0.451	0.2216	0.2921	0.6962	-3.594	0.0003254
17	rs3094509	37702294	2	GENO_2DF	534	NA	NA	NA	NA	0.5735	0.7507
17	rs4794758	37720433	2	ADD	525	0.9188	0.1783	0.6478	1.303	-0.4749	0.6349
17	rs4794758	37720433	2	DOMDEV	525	1.235	0.2343	0.7801	1.954	0.8997	0.3683
17	rs4794758	37720433	2	C2	525	0.494	0.2218	0.3198	0.763	-3.18	0.001474
17	rs4794758	37720433	2	GENO_2DF	525	NA	NA	NA	NA	0.813	0.666
17	rs1016990	37728924	3	ADD	538	1.203	0.1519	0.8929	1.62	1.214	0.2246
17	rs1016990	37728924	3	DOMDEV	538	1.004	0.2042	0.6732	1.499	0.02135	0.983
17	rs1016990	37728924	3	C2	538	0.4589	0.2196	0.2984	0.7058	-3.547	0.0003903
17	rs1016990	37728924	3	GENO_2DF	538	NA	NA	NA	NA	1.854	0.3958
17	rs799923	41251931	1	ADD	539	0.6827	0.215	0.4479	1.04	-1.775	0.07582
17	rs799923	41251931	1	DOMDEV	539	1.237	0.2656	0.7351	2.082	0.801	0.4231
17	rs799923	41251931	1	C2	539	0.4725	0.2181	0.3081	0.7245	-3.438	0.000587
17	rs799923	41251931	1	GENO_2DF	539	NA	NA	NA	NA	3.496	0.1741
17	rs983085	69212061	3	ADD	487	0.9333	0.133	0.7191	1.211	-0.5188	0.6039
17	rs983085	69212061	3	DOMDEV	487	1.035	0.1894	0.7138	1.5	0.1797	0.8574
17	rs983085	69212061	3	C2	487	0.4791	0.2267	0.3072	0.7472	-3.246	0.001172
17	rs983085	69212061	3	GENO_2DF	487	NA	NA	NA	NA	0.291	0.8646
17	rs1859962	71112612	3	ADD	484	0.8856	0.1403	0.6726	1.166	-0.8662	0.3864
17	rs1859962	71112612	3	DOMDEV	484	0.9195	0.1913	0.6319	1.338	-0.4387	0.6608
17	rs1859962	71112612	3	C2	484	0.4771	0.2261	0.3064	0.7431	-3.273	0.001063
17	rs1859962	71112612	3	GENO_2DF	484	NA	NA	NA	NA	1.05	0.5915
17	rs8066956	80034443	2	ADD	478	0.9994	0.252	0.6099	1.638	-0.002401	0.9981
17	rs8066956	80034443	2	DOMDEV	478	1.194	0.303	0.6594	2.163	0.5857	0.5581
17	rs8066956	80034443	2	C2	478	0.4678	0.2296	0.2983	0.7336	-3.31	0.0009343
17	rs8066956	80034443	2	GENO_2DF	478	NA	NA	NA	NA	0.748	0.688
17	rs6502051	80059332	1	ADD	480	1.195	0.1396	0.9088	1.571	1.275	0.2023
17	rs6502051	80059332	1	DOMDEV	480	1.065	0.1949	0.7268	1.56	0.3223	0.7472
17	rs6502051	80059332	1	C2	480	0.4677	0.2274	0.2995	0.7303	-3.342	0.0008307
17	rs6502051	80059332	1	GENO_2DF	480	NA	NA	NA	NA	1.997	0.3684
17	rs1127678	82101611	1	ADD	321	1.038	0.3971	0.4766	2.26	0.09351	0.9255
17	rs1127678	82101611	1	DOMDEV	321	0.5952	0.4539	0.2445	1.449	-1.143	0.2531
17	rs1127678	82101611	1	C2	321	0.5763	0.3258	0.3043	1.091	-1.692	0.09069
17	rs1127678	82101611	1	GENO_2DF	321	NA	NA	NA	NA	2.862	0.2391
19	rs713041	1106616	2	ADD	518	0.9254	0.1393	0.7042	1.216	-0.5568	0.5777
19	rs713041	1106616	2	DOMDEV	518	0.9011	0.197	0.6125	1.326	-0.5287	0.597
19	rs713041	1106616	2	C2	518	0.5331	0.2303	0.3395	0.8373	-2.731	0.006315
19	rs713041	1106616	2	GENO_2DF	518	NA	NA	NA	NA	0.6629	0.7179
19	rs8102476	38244973	2	ADD	483	1.128	0.136	0.8642	1.473	0.887	0.3751
19	rs8102476	38244973	2	DOMDEV	483	0.805	0.1922	0.5523	1.173	-1.129	0.2591
19	rs8102476	38244973	2	C2	483	0.4662	0.2252	0.2999	0.7249	-3.389	0.0007026
19	rs8102476	38244973	2	GENO_2DF	483	NA	NA	NA	NA	1.793	0.408
19	rs887391	41479716	4	ADD	479	1.744	0.2375	1.095	2.779	2.343	0.01913
19	rs887391	41479716	4	DOMDEV	479	0.8118	0.294	0.4563	1.444	-0.7091	0.4783
19	rs887391	41479716	4	C2	479	0.4602	0.2285	0.2941	0.7203	-3.396	0.0006839
19	rs887391	41479716	4	GENO_2DF	479	NA	NA	NA	NA	7.28	0.02625
19	rs2659056	50832687	3	ADD	484	1.381	0.1914	0.9492	2.01	1.687	0.09152
19	rs2659056	50832687	3	DOMDEV	484	0.9259	0.2419	0.5763	1.488	-0.3181	0.7504
19	rs2659056	50832687	3	C2	484	0.4671	0.2258	0.3001	0.727	-3.372	0.0007457
19	rs2659056	50832687	3	GENO_2DF	484	NA	NA	NA	NA	3.608	0.1647
19	rs17632542	50858501	4	ADD	545	0.6524	0.7227	0.1583	2.69	-0.591	0.5545
19	rs17632542	50858501	4	DOMDEV	545	0.7705	0.7721	0.1696	3.499	-0.3377	0.7356
19	rs17632542	50858501	4	C2	545	0.4599	0.2179	0.3001	0.705	-3.564	0.0003647
19	rs17632542	50858501	4	GENO_2DF	545	NA	NA	NA	NA	6.015	0.04942
19	rs1354774	50889862	4	ADD	541	0.8414	0.1395	0.6401	1.106	-1.238	0.2158
19	rs1354774	50889862	4	DOMDEV	541	1.263	0.1968	0.8586	1.857	1.185	0.236
19	rs1354774	50889862	4	C2	541	0.4504	0.22	0.2927	0.6933	-3.625	0.0002893
19	rs1354774	50889862	4	GENO_2DF	541	NA	NA	NA	NA	2.168	0.3382
19	rs2659122	51363026	3	ADD	485	0.638	0.2077	0.4246	0.9586	-2.164	0.0305
19	rs2659122	51363026	3	DOMDEV	485	1.272	0.2559	0.7703	2.101	0.9403	0.3471
19	rs2659122	51363026	3	C2	485	0.4598	0.2261	0.2952	0.7162	-3.437	0.0005889
19	rs2659122	51363026	3	GENO_2DF	485	NA	NA	NA	NA	5.074	0.07912
19	rs1506684	51371419	2	ADD	481	0.9793	0.1326	0.7552	1.27	-0.1577	0.8747
19	rs1506684	51371419	2	DOMDEV	481	1.06	0.1939	0.7252	1.551	0.3026	0.7622
19	rs1506684	51371419	2	C2	481	0.4703	0.2252	0.3025	0.7313	-3.35	0.0008087
19	rs1506684	51371419	2	GENO_2DF	481	NA	NA	NA	NA	0.1026	0.95
20	rs3918256	44640959	3	ADD	525	0.7872	0.1332	0.6063	1.022	-1.796	0.07253
20	rs3918256	44640959	3	DOMDEV	525	1.23	0.1903	0.847	1.786	1.087	0.2769
20	rs3918256	44640959	3	C2	525	0.4361	0.2229	0.2817	0.6751	-3.722	0.0001973
20	rs3918256	44640959	3	GENO_2DF	525	NA	NA	NA	NA	3.714	0.1561
20	rs3787268	46013092	1	ADD	402	0.7466	0.2664	0.4429	1.258	-1.097	0.2725
20	rs3787268	46013092	1	DOMDEV	402	1.474	0.3497	0.7428	2.925	1.11	0.2671
20	rs3787268	46013092	1	C2	402	0.5095	0.2849	0.2915	0.8905	-2.367	0.01792
20	rs3787268	46013092	1	GENO_2DF	402	NA	NA	NA	NA	1.481	0.4769
20	rs3787557	52783135	4	ADD	484	0.8533	0.7097	0.2123	3.429	-0.2235	0.8231
20	rs3787557	52783135	4	DOMDEV	484	1.016	0.7348	0.2407	4.29	0.02181	0.9826
20	rs3787557	52783135	4	C2	484	0.4725	0.2248	0.3041	0.7341	-3.335	0.0008526
20	rs3787557	52783135	4	GENO_2DF	484	NA	NA	NA	NA	0.4629	0.7934
20	rs2762939	54164712	4	ADD	499	0.9669	0.1993	0.6542	1.429	-0.1687	0.866
20	rs2762939	54164712	4	DOMDEV	499	1.112	0.2491	0.6822	1.811	0.4248	0.671
20	rs2762939	54164712	4	C2	499	0.4503	0.2253	0.2895	0.7002	-3.541	0.0003979
20	rs2762939	54164712	4	GENO_2DF	499	NA	NA	NA	NA	0.1987	0.9054
20	rs2296241	54169680	3	ADD	489	0.9616	0.1323	0.742	1.246	-0.2963	0.767
20	rs2296241	54169680	3	DOMDEV	489	1.029	0.189	0.7104	1.49	0.151	0.88
20	rs2296241	54169680	3	C2	489	0.4855	0.2244	0.3127	0.7536	-3.221	0.001277
20	rs2296241	54169680	3	GENO_2DF	489	NA	NA	NA	NA	0.1049	0.9489
22	rs5759167	43104206	2	ADD	328	1.038	0.1801	0.7293	1.477	0.2071	0.8359
22	rs5759167	43104206	2	DOMDEV	328	1.861	0.2848	1.065	3.253	2.181	0.02916
22	rs5759167	43104206	2	C2	328	0.5187	0.3175	0.2784	0.9666	-2.067	0.03873
22	rs5759167	43104206	2	GENO_2DF	328	NA	NA	NA	NA	4.931	0.08495
23	rs5945619	51498820	4	ADD	483	NA	NA	NA	NA	NA	NA
23	rs5945619	51498820	4	DOMDEV	483	NA	NA	NA	NA	NA	NA
23	rs5945619	51498820	4	C2	483	NA	NA	NA	NA	NA	NA
23	rs5945619	51498820	4	GENO_2DF	483	NA	NA	NA	NA	NA	NA
23	rs5919432	67801708	4	ADD	513	NA	NA	NA	NA	NA	NA
23	rs5919432	67801708	4	DOMDEV	513	NA	NA	NA	NA	NA	NA
23	rs5919432	67801708	4	C2	513	NA	NA	NA	NA	NA	NA
23	rs5919432	67801708	4	GENO_2DF	513	NA	NA	NA	NA	NA	NA

## Sheet: BMI_Agg_vs_Control_Adjusted
CHR	SNP	UNADJ	GC	BONF	HOLM	SIDAK_SS	SIDAK_SD	FDR_BH	FDR_BY
11	rs7931342	0.0002222	0.0002222	0.022	0.022	0.02176	0.02176	0.022	0.1139
11	rs10896438	0.001213	0.001213	0.1201	0.1189	0.1132	0.1121	0.06004	0.3109
10	rs7920517	0.005373	0.005373	0.532	0.5212	0.4134	0.407	0.1773	0.9181
11	rs11228565	0.01887	0.01887	1	1	0.8483	0.8394	0.3788	1
19	rs887391	0.01913	0.01913	1	1	0.8523	0.8404	0.3788	1
7	rs10244329	0.02679	0.02679	1	1	0.932	0.9221	0.4313	1
19	rs2659122	0.0305	0.0305	1	1	0.9534	0.9439	0.4313	1
2	rs632148	0.03795	0.03795	1	1	0.9783	0.9716	0.4573	1
6	rs130067	0.04157	0.04157	1	1	0.9851	0.979	0.4573	1
10	rs12529	0.07041	0.07041	1	1	0.9993	0.9986	0.6255	1
20	rs3918256	0.07253	0.07253	1	1	0.9994	0.9988	0.6255	1
17	rs799923	0.07582	0.07582	1	1	0.9996	0.999	0.6255	1
1	rs5845	0.08931	0.08931	1	1	0.9999	0.9997	0.6472	1
19	rs2659056	0.09152	0.09152	1	1	0.9999	0.9997	0.6472	1
11	rs2727270	0.09992	0.09992	1	1	1	0.9999	0.6595	1
3	rs1799977	0.1515	0.1515	1	1	1	1	0.8345	1
8	rs6983267	0.1599	0.1599	1	1	1	1	0.8345	1
4	rs629242	0.1644	0.1644	1	1	1	1	0.8345	1
11	rs1001179	0.1653	0.1653	1	1	1	1	0.8345	1
16	rs1529916	0.1748	0.1748	1	1	1	1	0.8345	1
3	rs4135275	0.1808	0.1808	1	1	1	1	0.8345	1
17	rs4054823	0.1906	0.1906	1	1	1	1	0.8345	1
12	rs6823	0.2006	0.2006	1	1	1	1	0.8345	1
17	rs6502051	0.2023	0.2023	1	1	1	1	0.8345	1
19	rs1354774	0.2158	0.2158	1	1	1	1	0.8547	1
17	rs1016990	0.2246	0.2246	1	1	1	1	0.8548	1
8	rs2928679	0.2331	0.2331	1	1	1	1	0.8548	1
7	rs10486567	0.2488	0.2488	1	1	1	1	0.8795	1
20	rs3787268	0.2725	0.2725	1	1	1	1	0.9303	1
12	rs2071358	0.3232	0.3232	1	1	1	1	1	1
12	rs7299460	0.3282	0.3282	1	1	1	1	1	1
2	rs721048	0.3464	0.3464	1	1	1	1	1	1
10	rs10740051	0.3714	0.3714	1	1	1	1	1	1
19	rs8102476	0.3751	0.3751	1	1	1	1	1	1
3	rs1050450	0.3754	0.3754	1	1	1	1	1	1
1	rs1380576	0.3754	0.3754	1	1	1	1	1	1
17	rs1859962	0.3864	0.3864	1	1	1	1	1	1
12	rs2946834	0.4017	0.4017	1	1	1	1	1	1
5	rs3733890	0.406	0.406	1	1	1	1	1	1
2	rs10187424	0.4178	0.4178	1	1	1	1	1	1
16	rs9939609	0.4202	0.4202	1	1	1	1	1	1
12	rs902774	0.4373	0.4373	1	1	1	1	1	1
7	rs6465657	0.4484	0.4484	1	1	1	1	1	1
10	rs6162	0.4576	0.4576	1	1	1	1	1	1
3	rs10934853	0.4724	0.4724	1	1	1	1	1	1
15	rs28665122	0.5078	0.5078	1	1	1	1	1	1
8	rs1016343	0.5193	0.5193	1	1	1	1	1	1
8	rs1512268	0.5322	0.5322	1	1	1	1	1	1
19	rs17632542	0.5545	0.5545	1	1	1	1	1	1
15	rs4965373	0.5558	0.5558	1	1	1	1	1	1
3	rs6763931	0.5716	0.5716	1	1	1	1	1	1
19	rs713041	0.5777	0.5777	1	1	1	1	1	1
6	rs4880	0.5953	0.5953	1	1	1	1	1	1
17	rs17552022	0.6002	0.6002	1	1	1	1	1	1
5	rs2121875	0.6025	0.6025	1	1	1	1	1	1
8	rs6470517	0.6032	0.6032	1	1	1	1	1	1
17	rs983085	0.6039	0.6039	1	1	1	1	1	1
8	rs6470494	0.604	0.604	1	1	1	1	1	1
8	rs16902094	0.6089	0.6089	1	1	1	1	1	1
5	rs3877899	0.6117	0.6117	1	1	1	1	1	1
17	rs4794758	0.6349	0.6349	1	1	1	1	1	1
4	rs7679673	0.6363	0.6363	1	1	1	1	1	1
12	rs3782905	0.678	0.678	1	1	1	1	1	1
9	rs11536889	0.6864	0.6864	1	1	1	1	1	1
8	rs2294008	0.6931	0.6931	1	1	1	1	1	1
5	rs2242652	0.7206	0.7206	1	1	1	1	1	1
11	rs594519	0.7237	0.7237	1	1	1	1	1	1
12	rs10875943	0.7308	0.7308	1	1	1	1	1	1
11	rs7127900	0.735	0.735	1	1	1	1	1	1
4	rs17021918	0.7396	0.7396	1	1	1	1	1	1
2	rs1056827	0.7553	0.7553	1	1	1	1	1	1
10	rs4962416	0.7595	0.7595	1	1	1	1	1	1
20	rs2296241	0.767	0.767	1	1	1	1	1	1
17	rs11545302	0.79	0.79	1	1	1	1	1	1
8	rs7000448	0.8116	0.8116	1	1	1	1	1	1
20	rs3787557	0.8231	0.8231	1	1	1	1	1	1
7	rs12155172	0.8331	0.8331	1	1	1	1	1	1
22	rs5759167	0.8359	0.8359	1	1	1	1	1	1
2	rs1465618	0.8553	0.8553	1	1	1	1	1	1
20	rs2762939	0.866	0.866	1	1	1	1	1	1
11	rs174448	0.8712	0.8712	1	1	1	1	1	1
19	rs1506684	0.8747	0.8747	1	1	1	1	1	1
2	rs2710647	0.8759	0.8759	1	1	1	1	1	1
17	rs3094509	0.919	0.919	1	1	1	1	1	1
8	rs13254738	0.9239	0.9239	1	1	1	1	1	1
17	rs1127678	0.9255	0.9255	1	1	1	1	1	1
1	rs12042763	0.9389	0.9389	1	1	1	1	1	1
7	rs3735035	0.9719	0.9719	1	1	1	1	1	1
2	rs2292884	0.9725	0.9725	1	1	1	1	1	1
4	rs12500426	0.9943	0.9943	1	1	1	1	1	1
12	rs2279744	0.9952	0.9952	1	1	1	1	1	1
17	rs8066956	0.9981	0.9981	1	1	1	1	1	1
2	rs12621278	0.9992	0.9992	1	1	1	1	1	1
8	rs6983561	0.9993	0.9993	1	1	1	1	1	1
3	rs17793693	0.9993	0.9993	1	1	1	1	1	1
8	rs1378897	1	1	1	1	1	1	1	1
12	rs7965399	1	1	1	1	1	1	1	1
23	rs5945619	1	1	1	1	1	1	1	1
23	rs5919432	1	1	1	1	1	1	1	1

## Sheet: BMI_Agg_vs_NAgg_OR
CHR	SNP	BP	A1	TEST	NMISS	OR	SE	L95	U95	STAT	P
1	rs5845	86863156	2	ADD	194	1.021	0.3518	0.5122	2.034	0.05816	0.9536
1	rs5845	86863156	2	DOMDEV	194	0.9938	0.4492	0.412	2.397	-0.01381	0.989
1	rs5845	86863156	2	C2	194	1.465	0.4581	0.597	3.596	0.8337	0.4044
1	rs5845	86863156	2	GENO_2DF	194	NA	NA	NA	NA	0.004236	0.9979
1	rs12042763	186682744	2	ADD	233	0.8719	0.4022	0.3964	1.918	-0.3408	0.7332
1	rs12042763	186682744	2	DOMDEV	233	1.513	0.4724	0.5996	3.821	0.8772	0.3804
1	rs12042763	186682744	2	C2	233	1.552	0.4486	0.6441	3.739	0.9794	0.3274
1	rs12042763	186682744	2	GENO_2DF	233	NA	NA	NA	NA	0.9656	0.617
1	rs1380576	204519150	4	ADD	86	1.165	0.3586	0.5769	2.353	0.4259	0.6701
1	rs1380576	204519150	4	DOMDEV	86	0.6593	0.5383	0.2295	1.893	-0.774	0.4389
1	rs1380576	204519150	4	C2	86	1.529	0.6326	0.4424	5.281	0.6707	0.5024
1	rs1380576	204519150	4	GENO_2DF	86	NA	NA	NA	NA	0.6315	0.7292
2	rs632148	31580962	4	ADD	196	2.138	0.3001	1.187	3.849	2.532	0.01134
2	rs632148	31580962	4	DOMDEV	196	0.7391	0.3867	0.3463	1.577	-0.7819	0.4343
2	rs632148	31580962	4	C2	196	1.507	0.4663	0.604	3.758	0.8789	0.3794
2	rs632148	31580962	4	GENO_2DF	196	NA	NA	NA	NA	6.615	0.03661
2	rs1056827	38075034	2	ADD	30	3.441e-05	12190	0	inf	-0.0008431	0.9993
2	rs1056827	38075034	2	DOMDEV	30	31600	12190	0	inf	0.00085	0.9993
2	rs1056827	38075034	2	C2	30	4.344	1.164	0.4441	42.49	1.262	0.2068
2	rs1056827	38075034	2	GENO_2DF	30	NA	NA	NA	NA	0.008879	0.9956
2	rs1465618	43326810	1	ADD	243	1.073	0.4146	0.476	2.418	0.1696	0.8653
2	rs1465618	43326810	1	DOMDEV	243	1.353	0.4817	0.5265	3.479	0.6282	0.5299
2	rs1465618	43326810	1	C2	243	1.48	0.4483	0.6148	3.564	0.8749	0.3816
2	rs1465618	43326810	1	GENO_2DF	243	NA	NA	NA	NA	1.366	0.5051
2	rs721048	62904596	1	ADD	250	4.615e-05	3849	0	inf	-0.002594	0.9979
2	rs721048	62904596	1	DOMDEV	250	25900	3849	0	inf	0.00264	0.9979
2	rs721048	62904596	1	C2	250	1.397	0.4263	0.6058	3.222	0.7842	0.4329
2	rs721048	62904596	1	GENO_2DF	250	NA	NA	NA	NA	0.3164	0.8537
2	rs2710647	63213970	2	ADD	241	1.144	0.2204	0.7424	1.761	0.6084	0.5429
2	rs2710647	63213970	2	DOMDEV	241	0.9315	0.3083	0.509	1.704	-0.2303	0.8179
2	rs2710647	63213970	2	C2	241	1.405	0.4263	0.6094	3.241	0.7983	0.4247
2	rs2710647	63213970	2	GENO_2DF	241	NA	NA	NA	NA	0.3947	0.8209
2	rs10187424	85567174	4	ADD	242	1.082	0.2219	0.7001	1.671	0.3538	0.7235
2	rs10187424	85567174	4	DOMDEV	242	0.5848	0.3239	0.31	1.103	-1.656	0.09767
2	rs10187424	85567174	4	C2	242	1.321	0.442	0.5555	3.141	0.6297	0.5289
2	rs10187424	85567174	4	GENO_2DF	242	NA	NA	NA	NA	2.746	0.2534
2	rs12621278	172446825	3	ADD	85	5.485e-05	12190	0	inf	-0.0008049	0.9994
2	rs12621278	172446825	3	DOMDEV	85	9736	12190	0	inf	0.0007534	0.9994
2	rs12621278	172446825	3	C2	85	2.136	0.6925	0.5497	8.301	1.096	0.2731
2	rs12621278	172446825	3	GENO_2DF	85	NA	NA	NA	NA	0.5703	0.7519
2	rs2292884	238443226	3	ADD	245	3.901e-05	3258	0	inf	-0.003116	0.9975
2	rs2292884	238443226	3	DOMDEV	245	16930	3258	0	inf	0.002989	0.9976
2	rs2292884	238443226	3	C2	245	1.466	0.4286	0.6331	3.397	0.8932	0.3717
2	rs2292884	238443226	3	GENO_2DF	245	NA	NA	NA	NA	1.73	0.421
3	rs17793693	12345971	1	ADD	190	70450	12190	0	inf	0.0009158	0.9993
3	rs17793693	12345971	1	DOMDEV	190	1.679e-05	12190	0	inf	-0.000902	0.9993
3	rs17793693	12345971	1	C2	190	1.508	0.4601	0.6122	3.717	0.8934	0.3716
3	rs17793693	12345971	1	GENO_2DF	190	NA	NA	NA	NA	0.03979	0.9803
3	rs4135275	12443844	3	ADD	235	1.206	0.431	0.518	2.806	0.4339	0.6643
3	rs4135275	12443844	3	DOMDEV	235	0.9833	0.506	0.3647	2.651	-0.03336	0.9734
3	rs4135275	12443844	3	C2	235	1.584	0.4485	0.6575	3.814	1.025	0.3053
3	rs4135275	12443844	3	GENO_2DF	235	NA	NA	NA	NA	0.3969	0.82
3	rs1799977	37012077	3	ADD	246	1.076	0.2479	0.6622	1.75	0.2973	0.7663
3	rs1799977	37012077	3	DOMDEV	246	0.617	0.3653	0.3015	1.263	-1.322	0.1863
3	rs1799977	37012077	3	C2	246	1.361	0.429	0.5869	3.154	0.7177	0.4729
3	rs1799977	37012077	3	GENO_2DF	246	NA	NA	NA	NA	1.86	0.3945
3	rs1050450	49357401	2	ADD	195	1.227	0.264	0.7317	2.059	0.7765	0.4375
3	rs1050450	49357401	2	DOMDEV	195	0.775	0.3697	0.3755	1.6	-0.6892	0.4907
3	rs1050450	49357401	2	C2	195	1.422	0.462	0.5752	3.517	0.7627	0.4456
3	rs1050450	49357401	2	GENO_2DF	195	NA	NA	NA	NA	0.79	0.6737
3	rs10934853	128319530	1	ADD	235	1.081	0.2859	0.6171	1.893	0.2715	0.786
3	rs10934853	128319530	1	DOMDEV	235	0.4909	0.4087	0.2204	1.094	-1.741	0.08168
3	rs10934853	128319530	1	C2	235	1.648	0.4533	0.6777	4.006	1.102	0.2706
3	rs10934853	128319530	1	GENO_2DF	235	NA	NA	NA	NA	3.574	0.1675
3	rs6763931	141383991	1	ADD	246	1.12	0.2255	0.7198	1.742	0.5019	0.6157
3	rs6763931	141383991	1	DOMDEV	246	1.483	0.3082	0.8105	2.713	1.278	0.2012
3	rs6763931	141383991	1	C2	246	1.381	0.4272	0.5976	3.189	0.7549	0.4503
3	rs6763931	141383991	1	GENO_2DF	246	NA	NA	NA	NA	2.042	0.3603
4	rs629242	56276871	2	ADD	242	1.196	0.3675	0.5822	2.458	0.4877	0.6258
4	rs629242	56276871	2	DOMDEV	242	0.5808	0.4656	0.2332	1.447	-1.167	0.2432
4	rs629242	56276871	2	C2	242	1.37	0.4284	0.5917	3.173	0.735	0.4623
4	rs629242	56276871	2	GENO_2DF	242	NA	NA	NA	NA	1.545	0.4618
4	rs12500426	94593458	1	ADD	233	1.214	0.2238	0.7831	1.882	0.8671	0.3859
4	rs12500426	94593458	1	DOMDEV	233	1.461	0.3171	0.785	2.72	1.196	0.2315
4	rs12500426	94593458	1	C2	233	1.518	0.4509	0.6271	3.672	0.9251	0.3549
4	rs12500426	94593458	1	GENO_2DF	233	NA	NA	NA	NA	2.182	0.336
4	rs17021918	94641726	2	ADD	244	0.8107	0.2695	0.4781	1.375	-0.7788	0.4361
4	rs17021918	94641726	2	DOMDEV	244	0.9965	0.365	0.4873	2.038	-0.009507	0.9924
4	rs17021918	94641726	2	C2	244	1.54	0.4467	0.6416	3.696	0.9666	0.3337
4	rs17021918	94641726	2	GENO_2DF	244	NA	NA	NA	NA	0.8224	0.6629
4	rs7679673	105140377	1	ADD	231	1.146	0.2572	0.6924	1.898	0.5311	0.5953
4	rs7679673	105140377	1	DOMDEV	231	0.6483	0.3473	0.3282	1.28	-1.248	0.212
4	rs7679673	105140377	1	C2	231	1.549	0.4496	0.6418	3.739	0.9737	0.3302
4	rs7679673	105140377	1	GENO_2DF	231	NA	NA	NA	NA	1.558	0.4588
5	rs2242652	1279913	2	ADD	246	0.6264	0.5379	0.2183	1.798	-0.8695	0.3846
5	rs2242652	1279913	2	DOMDEV	246	1.373	0.6288	0.4003	4.708	0.5041	0.6142
5	rs2242652	1279913	2	C2	246	1.338	0.4278	0.5785	3.095	0.6808	0.496
5	rs2242652	1279913	2	GENO_2DF	246	NA	NA	NA	NA	0.8713	0.6468
5	rs3877899	42801166	1	ADD	195	1.146	0.3179	0.6145	2.137	0.4282	0.6685
5	rs3877899	42801166	1	DOMDEV	195	0.961	0.428	0.4153	2.224	-0.09294	0.926
5	rs3877899	42801166	1	C2	195	1.429	0.4608	0.579	3.525	0.774	0.4389
5	rs3877899	42801166	1	GENO_2DF	195	NA	NA	NA	NA	0.2131	0.8989
5	rs2121875	44365443	3	ADD	242	0.8286	0.2407	0.517	1.328	-0.7809	0.4349
5	rs2121875	44365443	3	DOMDEV	242	1.365	0.3306	0.7138	2.608	0.9402	0.3471
5	rs2121875	44365443	3	C2	242	1.379	0.4288	0.595	3.195	0.7492	0.4537
5	rs2121875	44365443	3	GENO_2DF	242	NA	NA	NA	NA	1.103	0.5762
5	rs3733890	79126136	1	ADD	243	0.7109	0.3958	0.3273	1.544	-0.8623	0.3885
5	rs3733890	79126136	1	DOMDEV	243	1.44	0.4558	0.5893	3.517	0.7996	0.4239
5	rs3733890	79126136	1	C2	243	1.533	0.4489	0.6361	3.696	0.9522	0.341
5	rs3733890	79126136	1	GENO_2DF	243	NA	NA	NA	NA	0.8036	0.6691
6	rs130067	31150734	4	ADD	243	0.627	0.3899	0.292	1.346	-1.197	0.2313
6	rs130067	31150734	4	DOMDEV	243	0.989	0.4895	0.3789	2.581	-0.02266	0.9819
6	rs130067	31150734	4	C2	243	1.272	0.4307	0.5469	2.959	0.559	0.5762
6	rs130067	31150734	4	GENO_2DF	243	NA	NA	NA	NA	2.938	0.2302
6	rs4880	159692840	2	ADD	196	0.9506	0.2336	0.6014	1.502	-0.2171	0.8282
6	rs4880	159692840	2	DOMDEV	196	0.8617	0.3371	0.4451	1.668	-0.4415	0.6588
6	rs4880	159692840	2	C2	196	1.486	0.4574	0.6062	3.642	0.8658	0.3866
6	rs4880	159692840	2	GENO_2DF	196	NA	NA	NA	NA	0.2576	0.8791
7	rs12155172	20954872	1	ADD	232	1.166	0.3169	0.6264	2.17	0.4838	0.6285
7	rs12155172	20954872	1	DOMDEV	232	0.5872	0.4405	0.2476	1.392	-1.209	0.2267
7	rs12155172	20954872	1	C2	232	1.481	0.4533	0.609	3.6	0.8659	0.3865
7	rs12155172	20954872	1	GENO_2DF	232	NA	NA	NA	NA	1.532	0.4649
7	rs10486567	27936944	1	ADD	238	0.8728	0.4047	0.3949	1.929	-0.3361	0.7368
7	rs10486567	27936944	1	DOMDEV	238	1.19	0.4726	0.4714	3.006	0.3689	0.7122
7	rs10486567	27936944	1	C2	238	1.215	0.4316	0.5214	2.831	0.4511	0.6519
7	rs10486567	27936944	1	GENO_2DF	238	NA	NA	NA	NA	0.1447	0.9302
7	rs6465657	98187015	4	ADD	235	1.054	0.2286	0.6733	1.649	0.2292	0.8187
7	rs6465657	98187015	4	DOMDEV	235	0.9688	0.3138	0.5237	1.792	-0.1011	0.9195
7	rs6465657	98187015	4	C2	235	1.573	0.4478	0.6539	3.782	1.011	0.312
7	rs6465657	98187015	4	GENO_2DF	235	NA	NA	NA	NA	0.06108	0.9699
7	rs10244329	128248636	2	ADD	92	2.288	0.3945	1.056	4.957	2.098	0.03593
7	rs10244329	128248636	2	DOMDEV	92	1.317	0.5057	0.4886	3.548	0.5438	0.5866
7	rs10244329	128248636	2	C2	92	1.41	0.6344	0.4066	4.889	0.5416	0.5881
7	rs10244329	128248636	2	GENO_2DF	92	NA	NA	NA	NA	4.438	0.1087
7	rs3735035	131195959	2	ADD	232	1.612	0.2305	1.026	2.533	2.073	0.03816
7	rs3735035	131195959	2	DOMDEV	232	0.9742	0.323	0.5172	1.835	-0.08092	0.9355
7	rs3735035	131195959	2	C2	232	1.421	0.4536	0.5842	3.457	0.775	0.4383
7	rs3735035	131195959	2	GENO_2DF	232	NA	NA	NA	NA	4.484	0.1062
8	rs2928679	23438975	2	ADD	241	0.8396	0.241	0.5235	1.346	-0.7255	0.4682
8	rs2928679	23438975	2	DOMDEV	241	1.036	0.3224	0.551	1.95	0.1111	0.9115
8	rs2928679	23438975	2	C2	241	1.567	0.4466	0.653	3.76	1.006	0.3146
8	rs2928679	23438975	2	GENO_2DF	241	NA	NA	NA	NA	0.531	0.7668
8	rs1512268	23668950	1	ADD	235	0.9434	0.2405	0.5888	1.512	-0.2423	0.8085
8	rs1512268	23668950	1	DOMDEV	235	1.105	0.324	0.5856	2.085	0.3083	0.7579
8	rs1512268	23668950	1	C2	235	1.561	0.4482	0.6484	3.757	0.9934	0.3205
8	rs1512268	23668950	1	GENO_2DF	235	NA	NA	NA	NA	0.1217	0.941
8	rs1016343	127081052	2	ADD	225	4.576e-05	3515	0	inf	-0.002842	0.9977
8	rs1016343	127081052	2	DOMDEV	225	25360	3515	0	inf	0.002885	0.9977
8	rs1016343	127081052	2	C2	225	1.261	0.4614	0.5103	3.114	0.5019	0.6157
8	rs1016343	127081052	2	GENO_2DF	225	NA	NA	NA	NA	0.1925	0.9082
8	rs13254738	127092098	4	ADD	235	0.8785	0.3	0.4879	1.582	-0.4317	0.666
8	rs13254738	127092098	4	DOMDEV	235	1.263	0.3831	0.5959	2.676	0.6089	0.5426
8	rs13254738	127092098	4	C2	235	1.572	0.4521	0.6479	3.812	0.9999	0.3174
8	rs13254738	127092098	4	GENO_2DF	235	NA	NA	NA	NA	0.3837	0.8254
8	rs6983561	127094635	4	ADD	242	4.893e-05	12190	0	inf	-0.0008143	0.9994
8	rs6983561	127094635	4	DOMDEV	242	14290	12190	0	inf	0.0007849	0.9994
8	rs6983561	127094635	4	C2	242	1.264	0.4366	0.5374	2.975	0.5373	0.591
8	rs6983561	127094635	4	GENO_2DF	242	NA	NA	NA	NA	0.4573	0.7956
8	rs1378897	127110414	1	ADD	242	NA	NA	NA	NA	NA	NA
8	rs1378897	127110414	1	DOMDEV	242	NA	NA	NA	NA	NA	NA
8	rs1378897	127110414	1	C2	242	NA	NA	NA	NA	NA	NA
8	rs1378897	127110414	1	GENO_2DF	242	NA	NA	NA	NA	NA	NA
8	rs16902094	127308101	3	ADD	240	1.153	0.5862	0.3653	3.636	0.2422	0.8086
8	rs16902094	127308101	3	DOMDEV	240	1.777	0.646	0.5011	6.304	0.8902	0.3733
8	rs16902094	127308101	3	C2	240	1.717	0.4545	0.7047	4.186	1.19	0.2341
8	rs16902094	127308101	3	GENO_2DF	240	NA	NA	NA	NA	4.661	0.09724
8	rs6983267	127401060	2	ADD	244	1.352	0.2022	0.9097	2.009	1.492	0.1358
8	rs6983267	127401060	2	DOMDEV	244	0.6194	0.3166	0.333	1.152	-1.513	0.1303
8	rs6983267	127401060	2	C2	244	1.661	0.4512	0.686	4.022	1.125	0.2608
8	rs6983267	127401060	2	GENO_2DF	244	NA	NA	NA	NA	4.283	0.1175
8	rs7000448	127428925	2	ADD	234	0.9439	0.2446	0.5844	1.524	-0.2362	0.8133
8	rs7000448	127428925	2	DOMDEV	234	0.7603	0.3497	0.3831	1.509	-0.7836	0.4333
8	rs7000448	127428925	2	C2	234	1.547	0.449	0.6417	3.73	0.9719	0.3311
8	rs7000448	127428925	2	GENO_2DF	234	NA	NA	NA	NA	0.9563	0.6199
8	rs6470517	127448159	3	ADD	215	1.227	0.6211	0.3631	4.144	0.3289	0.7422
8	rs6470517	127448159	3	DOMDEV	215	0.463	0.7184	0.1133	1.892	-1.072	0.2837
8	rs6470517	127448159	3	C2	215	1.576	0.4884	0.6051	4.104	0.9314	0.3517
8	rs6470517	127448159	3	GENO_2DF	215	NA	NA	NA	NA	2.061	0.3568
8	rs6470494	128087904	2	ADD	239	0.6331	0.3907	0.2944	1.361	-1.17	0.2419
8	rs6470494	128087904	2	DOMDEV	239	1.497	0.4566	0.6117	3.662	0.8833	0.3771
8	rs6470494	128087904	2	C2	239	1.498	0.4492	0.6212	3.613	0.8999	0.3682
8	rs6470494	128087904	2	GENO_2DF	239	NA	NA	NA	NA	1.372	0.5035
8	rs2294008	142680513	2	ADD	235	1.439	0.2322	0.9129	2.268	1.567	0.117
8	rs2294008	142680513	2	DOMDEV	235	1.282	0.3162	0.6901	2.383	0.7869	0.4313
8	rs2294008	142680513	2	C2	235	1.507	0.4539	0.6192	3.67	0.904	0.366
8	rs2294008	142680513	2	GENO_2DF	235	NA	NA	NA	NA	3.213	0.2006
9	rs11536889	117715853	4	ADD	241	4.126e-05	5447	0	inf	-0.001853	0.9985
9	rs11536889	117715853	4	DOMDEV	241	11610	5447	0	inf	0.001718	0.9986
9	rs11536889	117715853	4	C2	241	1.265	0.432	0.5424	2.95	0.544	0.5865
9	rs11536889	117715853	4	GENO_2DF	241	NA	NA	NA	NA	3.38	0.1845
10	rs12529	5136651	3	ADD	250	1.091	0.2189	0.7103	1.675	0.3973	0.6911
10	rs12529	5136651	3	DOMDEV	250	1.55	0.3077	0.8479	2.832	1.424	0.1545
10	rs12529	5136651	3	C2	250	1.247	0.4293	0.5377	2.893	0.5147	0.6068
10	rs12529	5136651	3	GENO_2DF	250	NA	NA	NA	NA	2.402	0.3008
10	rs10740051	46025670	1	ADD	234	1.465	0.2789	0.8481	2.53	1.369	0.171
10	rs10740051	46025670	1	DOMDEV	234	0.7663	0.3701	0.371	1.583	-0.7192	0.472
10	rs10740051	46025670	1	C2	234	1.467	0.4513	0.6056	3.552	0.8487	0.3961
10	rs10740051	46025670	1	GENO_2DF	234	NA	NA	NA	NA	1.876	0.3915
10	rs7920517	46063201	1	ADD	232	1.077	0.2089	0.7148	1.621	0.3533	0.7239
10	rs7920517	46063201	1	DOMDEV	232	0.7354	0.317	0.395	1.369	-0.9696	0.3323
10	rs7920517	46063201	1	C2	232	1.52	0.4499	0.6294	3.672	0.9308	0.3519
10	rs7920517	46063201	1	GENO_2DF	232	NA	NA	NA	NA	1.069	0.5858
10	rs6162	102837224	1	ADD	249	1.083	0.2424	0.6735	1.742	0.3295	0.7418
10	rs6162	102837224	1	DOMDEV	249	1.305	0.3185	0.699	2.436	0.8358	0.4033
10	rs6162	102837224	1	C2	249	1.386	0.4282	0.5989	3.208	0.7628	0.4456
10	rs6162	102837224	1	GENO_2DF	249	NA	NA	NA	NA	1.077	0.5835
10	rs4962416	125008303	4	ADD	245	1.541	0.2586	0.9286	2.559	1.673	0.09426
10	rs4962416	125008303	4	DOMDEV	245	0.3542	0.3825	0.1674	0.7497	-2.713	0.006661
10	rs4962416	125008303	4	C2	245	1.415	0.453	0.5824	3.439	0.7666	0.4433
10	rs4962416	125008303	4	GENO_2DF	245	NA	NA	NA	NA	7.576	0.02264
11	rs7127900	2212344	1	ADD	241	0.6883	0.3914	0.3196	1.482	-0.9543	0.3399
11	rs7127900	2212344	1	DOMDEV	241	1.33	0.4737	0.5256	3.366	0.6024	0.5469
11	rs7127900	2212344	1	C2	241	1.509	0.4481	0.6269	3.631	0.9179	0.3587
11	rs7127900	2212344	1	GENO_2DF	241	NA	NA	NA	NA	0.9258	0.6295
11	rs1001179	34438684	2	ADD	196	0.5959	0.5394	0.207	1.715	-0.9596	0.3373
11	rs1001179	34438684	2	DOMDEV	196	2.103	0.601	0.6475	6.829	1.237	0.2162
11	rs1001179	34438684	2	C2	196	1.57	0.4592	0.6384	3.863	0.9828	0.3257
11	rs1001179	34438684	2	GENO_2DF	196	NA	NA	NA	NA	1.539	0.4632
11	rs594519	56305228	2	ADD	242	0.6095	0.5362	0.2131	1.743	-0.9234	0.3558
11	rs594519	56305228	2	DOMDEV	242	1.801	0.5951	0.5611	5.782	0.9888	0.3227
11	rs594519	56305228	2	C2	242	1.392	0.4267	0.6034	3.213	0.7758	0.4378
11	rs594519	56305228	2	GENO_2DF	242	NA	NA	NA	NA	1.006	0.6047
11	rs2727270	61603237	2	ADD	242	4.338e-05	7029	0	inf	-0.001429	0.9989
11	rs2727270	61603237	2	DOMDEV	242	12600	7029	0	inf	0.001343	0.9989
11	rs2727270	61603237	2	C2	242	1.297	0.4295	0.5588	3.009	0.6052	0.5451
11	rs2727270	61603237	2	GENO_2DF	242	NA	NA	NA	NA	2.07	0.3553
11	rs174448	61872101	4	ADD	247	0.843	0.2755	0.4913	1.447	-0.6199	0.5353
11	rs174448	61872101	4	DOMDEV	247	1.217	0.3478	0.6157	2.407	0.5654	0.5718
11	rs174448	61872101	4	C2	247	1.262	0.4275	0.5459	2.917	0.544	0.5864
11	rs174448	61872101	4	GENO_2DF	247	NA	NA	NA	NA	0.4807	0.7863
11	rs10896438	69139102	3	ADD	248	0.5844	0.2883	0.3321	1.028	-1.863	0.0624
11	rs10896438	69139102	3	DOMDEV	248	1.794	0.3627	0.881	3.652	1.611	0.1072
11	rs10896438	69139102	3	C2	248	1.41	0.4281	0.6094	3.263	0.8029	0.4221
11	rs10896438	69139102	3	GENO_2DF	248	NA	NA	NA	NA	3.989	0.136
11	rs11228565	69211113	1	ADD	244	0.6819	0.3941	0.3149	1.476	-0.9716	0.3313
11	rs11228565	69211113	1	DOMDEV	244	0.9822	0.4843	0.3802	2.537	-0.03717	0.9703
11	rs11228565	69211113	1	C2	244	1.5	0.4504	0.6204	3.626	0.9002	0.368
11	rs11228565	69211113	1	GENO_2DF	244	NA	NA	NA	NA	2.075	0.3543
11	rs7931342	69227030	2	ADD	240	1.292	0.2451	0.799	2.088	1.044	0.2963
11	rs7931342	69227030	2	DOMDEV	240	1.525	0.3186	0.8169	2.847	1.325	0.1852
11	rs7931342	69227030	2	C2	240	1.552	0.4509	0.6415	3.757	0.9752	0.3294
11	rs7931342	69227030	2	GENO_2DF	240	NA	NA	NA	NA	3.09	0.2133
12	rs3782905	47872384	3	ADD	208	1.152	0.2514	0.7038	1.886	0.5626	0.5737
12	rs3782905	47872384	3	DOMDEV	208	1.119	0.3611	0.5514	2.271	0.3115	0.7554
12	rs3782905	47872384	3	C2	208	1.427	0.434	0.6095	3.341	0.8194	0.4126
12	rs3782905	47872384	3	GENO_2DF	208	NA	NA	NA	NA	0.6328	0.7288
12	rs7299460	48296268	2	ADD	216	0.8145	0.3019	0.4507	1.472	-0.6795	0.4968
12	rs7299460	48296268	2	DOMDEV	216	0.789	0.4021	0.3588	1.735	-0.5894	0.5556
12	rs7299460	48296268	2	C2	216	1.655	0.4819	0.6435	4.256	1.045	0.2959
12	rs7299460	48296268	2	GENO_2DF	216	NA	NA	NA	NA	1.832	0.4001
12	rs6823	48362412	3	ADD	233	0.9491	0.2333	0.6008	1.499	-0.224	0.8227
12	rs6823	48362412	3	DOMDEV	233	1.057	0.324	0.5599	1.994	0.1698	0.8652
12	rs6823	48362412	3	C2	233	1.49	0.4511	0.6156	3.607	0.8843	0.3765
12	rs6823	48362412	3	GENO_2DF	233	NA	NA	NA	NA	0.06594	0.9676
12	rs2071358	48366449	1	ADD	240	1.51	0.467	0.6047	3.771	0.8826	0.3774
12	rs2071358	48366449	1	DOMDEV	240	0.8152	0.5433	0.281	2.365	-0.376	0.7069
12	rs2071358	48366449	1	C2	240	1.312	0.4308	0.564	3.052	0.6303	0.5285
12	rs2071358	48366449	1	GENO_2DF	240	NA	NA	NA	NA	1.06	0.5885
12	rs10875943	49282227	4	ADD	243	0.9044	0.3033	0.4991	1.639	-0.3312	0.7405
12	rs10875943	49282227	4	DOMDEV	243	0.7998	0.3902	0.3723	1.718	-0.5725	0.567
12	rs10875943	49282227	4	C2	243	1.273	0.4296	0.5483	2.954	0.5612	0.5746
12	rs10875943	49282227	4	GENO_2DF	243	NA	NA	NA	NA	1.017	0.6014
12	rs902774	52880120	1	ADD	245	0.8864	0.5675	0.2915	2.696	-0.2125	0.8317
12	rs902774	52880120	1	DOMDEV	245	1.022	0.6421	0.2905	3.599	0.03459	0.9724
12	rs902774	52880120	1	C2	245	1.528	0.4515	0.6305	3.701	0.9385	0.348
12	rs902774	52880120	1	GENO_2DF	245	NA	NA	NA	NA	0.1121	0.9455
12	rs2279744	68808800	3	ADD	228	0.9539	0.2589	0.5743	1.584	-0.1822	0.8554
12	rs2279744	68808800	3	DOMDEV	228	1.504	0.3461	0.7631	2.963	1.179	0.2385
12	rs2279744	68808800	3	C2	228	1.228	0.4336	0.5249	2.872	0.4733	0.636
12	rs2279744	68808800	3	GENO_2DF	228	NA	NA	NA	NA	1.496	0.4733
12	rs2946834	102394036	2	ADD	244	1.074	0.2818	0.6183	1.866	0.2537	0.7998
12	rs2946834	102394036	2	DOMDEV	244	0.9564	0.3647	0.4679	1.955	-0.1221	0.9028
12	rs2946834	102394036	2	C2	244	1.28	0.4278	0.5533	2.96	0.5765	0.5643
12	rs2946834	102394036	2	GENO_2DF	244	NA	NA	NA	NA	0.06455	0.9682
12	rs7965399	102497908	4	ADD	243	NA	NA	NA	NA	NA	NA
12	rs7965399	102497908	4	DOMDEV	243	NA	NA	NA	NA	NA	NA
12	rs7965399	102497908	4	C2	243	NA	NA	NA	NA	NA	NA
12	rs7965399	102497908	4	GENO_2DF	243	NA	NA	NA	NA	NA	NA
15	rs28665122	101277522	1	ADD	191	4.436e-05	8619	0	inf	-0.001163	0.9991
15	rs28665122	101277522	1	DOMDEV	191	38370	8619	0	inf	0.001225	0.999
15	rs28665122	101277522	1	C2	191	1.713	0.4857	0.6611	4.438	1.108	0.2679
15	rs28665122	101277522	1	GENO_2DF	191	NA	NA	NA	NA	1.722	0.4227
15	rs4965373	101812395	1	ADD	196	0.5512	0.3914	0.2559	1.187	-1.522	0.1281
15	rs4965373	101812395	1	DOMDEV	196	1.166	0.482	0.4535	3	0.3192	0.7496
15	rs4965373	101812395	1	C2	196	1.556	0.4604	0.6311	3.836	0.9603	0.3369
15	rs4965373	101812395	1	GENO_2DF	196	NA	NA	NA	NA	3.282	0.1938
16	rs1529916	8897333	2	ADD	231	0.6383	0.3912	0.2965	1.374	-1.148	0.2511
16	rs1529916	8897333	2	DOMDEV	231	1.59	0.4585	0.6473	3.905	1.011	0.3118
16	rs1529916	8897333	2	C2	231	1.516	0.4501	0.6275	3.663	0.9247	0.3551
16	rs1529916	8897333	2	GENO_2DF	231	NA	NA	NA	NA	1.39	0.4992
16	rs9939609	53786615	1	ADD	242	1.317	0.2108	0.8713	1.991	1.307	0.1914
16	rs9939609	53786615	1	DOMDEV	242	0.5338	0.3181	0.2862	0.9958	-1.973	0.04847
16	rs9939609	53786615	1	C2	242	1.279	0.4317	0.549	2.982	0.5709	0.5681
16	rs9939609	53786615	1	GENO_2DF	242	NA	NA	NA	NA	4.868	0.08769
17	rs11545302	12899963	3	ADD	235	0.8934	0.3039	0.4924	1.621	-0.3709	0.7107
17	rs11545302	12899963	3	DOMDEV	235	0.7054	0.392	0.3272	1.521	-0.8902	0.3733
17	rs11545302	12899963	3	C2	235	1.221	0.4314	0.5242	2.844	0.4627	0.6436
17	rs11545302	12899963	3	GENO_2DF	235	NA	NA	NA	NA	1.965	0.3743
17	rs17552022	12994978	4	ADD	248	4.367e-05	12190	0	inf	-0.0008236	0.9993
17	rs17552022	12994978	4	DOMDEV	248	16820	12190	0	inf	0.0007983	0.9994
17	rs17552022	12994978	4	C2	248	1.32	0.4264	0.5723	3.044	0.651	0.515
17	rs17552022	12994978	4	GENO_2DF	248	NA	NA	NA	NA	0.5775	0.7492
17	rs4054823	13721707	4	ADD	242	1.021	0.2111	0.6753	1.545	0.09991	0.9204
17	rs4054823	13721707	4	DOMDEV	242	1.023	0.3075	0.5598	1.869	0.07367	0.9413
17	rs4054823	13721707	4	C2	242	1.385	0.4271	0.5997	3.199	0.7625	0.4457
17	rs4054823	13721707	4	GENO_2DF	242	NA	NA	NA	NA	0.01697	0.9916
17	rs3094509	37702294	2	ADD	245	1.068	0.2249	0.6872	1.659	0.2917	0.7705
17	rs3094509	37702294	2	DOMDEV	245	0.5849	0.3437	0.2982	1.147	-1.561	0.1186
17	rs3094509	37702294	2	C2	245	1.317	0.4291	0.5678	3.053	0.6409	0.5216
17	rs3094509	37702294	2	GENO_2DF	245	NA	NA	NA	NA	2.511	0.285
17	rs4794758	37720433	2	ADD	248	0.7502	0.3292	0.3935	1.43	-0.8731	0.3826
17	rs4794758	37720433	2	DOMDEV	248	1.092	0.4237	0.4761	2.506	0.2084	0.8349
17	rs4794758	37720433	2	C2	248	1.356	0.4264	0.5882	3.128	0.7151	0.4745
17	rs4794758	37720433	2	GENO_2DF	248	NA	NA	NA	NA	0.9764	0.6137
17	rs1016990	37728924	3	ADD	248	1.154	0.2372	0.7253	1.838	0.6057	0.5447
17	rs1016990	37728924	3	DOMDEV	248	0.6968	0.3415	0.3568	1.361	-1.058	0.2901
17	rs1016990	37728924	3	C2	248	1.392	0.428	0.6014	3.22	0.772	0.4401
17	rs1016990	37728924	3	GENO_2DF	248	NA	NA	NA	NA	1.16	0.56
17	rs799923	41251931	1	ADD	251	0.6919	0.392	0.3209	1.492	-0.9393	0.3476
17	rs799923	41251931	1	DOMDEV	251	1.202	0.4733	0.4755	3.039	0.389	0.6973
17	rs799923	41251931	1	C2	251	1.382	0.4252	0.6008	3.181	0.7617	0.4463
17	rs799923	41251931	1	GENO_2DF	251	NA	NA	NA	NA	1.069	0.5859
17	rs983085	69212061	3	ADD	239	0.7651	0.2211	0.496	1.18	-1.211	0.2259
17	rs983085	69212061	3	DOMDEV	239	0.9511	0.3165	0.5114	1.769	-0.1585	0.8741
17	rs983085	69212061	3	C2	239	1.513	0.4488	0.6279	3.647	0.9232	0.3559
17	rs983085	69212061	3	GENO_2DF	239	NA	NA	NA	NA	1.61	0.4471
17	rs1859962	71112612	3	ADD	238	1.22	0.2195	0.7935	1.876	0.9063	0.3648
17	rs1859962	71112612	3	DOMDEV	238	0.7621	0.3131	0.4126	1.408	-0.8675	0.3857
17	rs1859962	71112612	3	C2	238	1.635	0.4505	0.676	3.953	1.091	0.2754
17	rs1859962	71112612	3	GENO_2DF	238	NA	NA	NA	NA	1.598	0.4498
17	rs8066956	80034443	2	ADD	233	1.721	0.3117	0.9344	3.171	1.742	0.08145
17	rs8066956	80034443	2	DOMDEV	233	0.8452	0.4073	0.3804	1.878	-0.4128	0.6797
17	rs8066956	80034443	2	C2	233	1.413	0.4543	0.5801	3.443	0.7614	0.4464
17	rs8066956	80034443	2	GENO_2DF	233	NA	NA	NA	NA	3.616	0.164
17	rs6502051	80059332	1	ADD	238	0.9191	0.2362	0.5785	1.46	-0.357	0.7211
17	rs6502051	80059332	1	DOMDEV	238	1.021	0.3276	0.5371	1.94	0.06258	0.9501
17	rs6502051	80059332	1	C2	238	1.484	0.4481	0.6164	3.571	0.8803	0.3787
17	rs6502051	80059332	1	GENO_2DF	238	NA	NA	NA	NA	0.1296	0.9373
17	rs1127678	82101611	1	ADD	85	1.611	0.6717	0.4319	6.009	0.7099	0.4777
17	rs1127678	82101611	1	DOMDEV	85	0.9559	0.759	0.2159	4.231	-0.05947	0.9526
17	rs1127678	82101611	1	C2	85	2.12	0.719	0.5179	8.677	1.045	0.296
17	rs1127678	82101611	1	GENO_2DF	85	NA	NA	NA	NA	1.011	0.6033
19	rs713041	1106616	2	ADD	196	0.614	0.281	0.354	1.065	-1.736	0.08258
19	rs713041	1106616	2	DOMDEV	196	1.303	0.3641	0.6385	2.661	0.7277	0.4668
19	rs713041	1106616	2	C2	196	1.547	0.4614	0.6263	3.821	0.9459	0.3442
19	rs713041	1106616	2	GENO_2DF	196	NA	NA	NA	NA	3.025	0.2204
19	rs8102476	38244973	2	ADD	242	0.939	0.2322	0.5957	1.48	-0.2713	0.7861
19	rs8102476	38244973	2	DOMDEV	242	1.067	0.3143	0.5762	1.976	0.2063	0.8366
19	rs8102476	38244973	2	C2	242	1.375	0.4273	0.5949	3.176	0.7447	0.4565
19	rs8102476	38244973	2	GENO_2DF	242	NA	NA	NA	NA	0.09505	0.9536
19	rs887391	41479716	4	ADD	240	1.47	0.3699	0.712	3.036	1.042	0.2975
19	rs887391	41479716	4	DOMDEV	240	1.445	0.4469	0.6017	3.469	0.8231	0.4104
19	rs887391	41479716	4	C2	240	1.365	0.4348	0.5823	3.202	0.7163	0.4738
19	rs887391	41479716	4	GENO_2DF	240	NA	NA	NA	NA	5.805	0.05489
19	rs2659056	50832687	3	ADD	241	1.015	0.3085	0.5543	1.858	0.04737	0.9622
19	rs2659056	50832687	3	DOMDEV	241	0.6563	0.4096	0.2941	1.465	-1.028	0.3038
19	rs2659056	50832687	3	C2	241	1.419	0.4271	0.6142	3.277	0.8187	0.413
19	rs2659056	50832687	3	GENO_2DF	241	NA	NA	NA	NA	1.563	0.4576
19	rs17632542	50858501	4	ADD	252	4.235e-05	12190	0	inf	-0.0008261	0.9993
19	rs17632542	50858501	4	DOMDEV	252	7480	12190	0	inf	0.0007318	0.9994
19	rs17632542	50858501	4	C2	252	1.389	0.4265	0.6021	3.204	0.7705	0.441
19	rs17632542	50858501	4	GENO_2DF	252	NA	NA	NA	NA	3.363	0.1861
19	rs1354774	50889862	4	ADD	251	0.7231	0.2669	0.4285	1.22	-1.215	0.2245
19	rs1354774	50889862	4	DOMDEV	251	1.459	0.3476	0.7383	2.883	1.087	0.2771
19	rs1354774	50889862	4	C2	251	1.328	0.4266	0.5756	3.065	0.6651	0.506
19	rs1354774	50889862	4	GENO_2DF	251	NA	NA	NA	NA	1.799	0.4067
19	rs2659122	51363026	3	ADD	242	0.7339	0.3323	0.3826	1.408	-0.9312	0.3518
19	rs2659122	51363026	3	DOMDEV	242	0.9254	0.4196	0.4066	2.106	-0.1848	0.8534
19	rs2659122	51363026	3	C2	242	1.423	0.4274	0.6156	3.287	0.8247	0.4095
19	rs2659122	51363026	3	GENO_2DF	242	NA	NA	NA	NA	1.934	0.3802
19	rs1506684	51371419	2	ADD	241	1.233	0.2159	0.8073	1.882	0.9688	0.3326
19	rs1506684	51371419	2	DOMDEV	241	1.254	0.3092	0.6841	2.299	0.7323	0.464
19	rs1506684	51371419	2	C2	241	1.492	0.4297	0.6426	3.463	0.9309	0.3519
19	rs1506684	51371419	2	GENO_2DF	241	NA	NA	NA	NA	1.589	0.4519
20	rs3918256	44640959	3	ADD	246	0.5376	0.2901	0.3044	0.9493	-2.139	0.0324
20	rs3918256	44640959	3	DOMDEV	246	1.815	0.3603	0.8959	3.678	1.655	0.09796
20	rs3918256	44640959	3	C2	246	1.191	0.4347	0.508	2.792	0.402	0.6877
20	rs3918256	44640959	3	GENO_2DF	246	NA	NA	NA	NA	4.99	0.08251
20	rs3787268	46013092	1	ADD	118	0.9545	0.4306	0.4104	2.22	-0.1082	0.9138
20	rs3787268	46013092	1	DOMDEV	118	0.8616	0.6337	0.2488	2.983	-0.2351	0.8141
20	rs3787268	46013092	1	C2	118	3.238	0.7841	0.6964	15.06	1.498	0.134
20	rs3787268	46013092	1	GENO_2DF	118	NA	NA	NA	NA	0.1375	0.9336
20	rs3787557	52783135	4	ADD	242	4.329e-05	12190	0	inf	-0.0008243	0.9993
20	rs3787557	52783135	4	DOMDEV	242	20210	12190	0	inf	0.0008134	0.9994
20	rs3787557	52783135	4	C2	242	1.389	0.4261	0.6027	3.203	0.7717	0.4403
20	rs3787557	52783135	4	GENO_2DF	242	NA	NA	NA	NA	0.1381	0.9333
20	rs2762939	54164712	4	ADD	248	0.5292	0.5306	0.1871	1.497	-1.199	0.2304
20	rs2762939	54164712	4	DOMDEV	248	1.913	0.5824	0.6108	5.989	1.113	0.2655
20	rs2762939	54164712	4	C2	248	1.476	0.4485	0.613	3.556	0.8687	0.385
20	rs2762939	54164712	4	GENO_2DF	248	NA	NA	NA	NA	1.473	0.4787
20	rs2296241	54169680	3	ADD	240	1.145	0.2256	0.7358	1.781	0.5997	0.5487
20	rs2296241	54169680	3	DOMDEV	240	1.227	0.3108	0.6674	2.256	0.6587	0.5101
20	rs2296241	54169680	3	C2	240	1.569	0.4476	0.6527	3.773	1.007	0.314
20	rs2296241	54169680	3	GENO_2DF	240	NA	NA	NA	NA	0.7863	0.6749
22	rs5759167	43104206	2	ADD	92	1.063	0.3206	0.5673	1.993	0.1917	0.848
22	rs5759167	43104206	2	DOMDEV	92	1.482	0.485	0.5729	3.834	0.8114	0.4171
22	rs5759167	43104206	2	C2	92	1.572	0.6251	0.4618	5.353	0.7239	0.4691
22	rs5759167	43104206	2	GENO_2DF	92	NA	NA	NA	NA	0.7209	0.6974
23	rs5945619	51498820	4	ADD	242	NA	NA	NA	NA	NA	NA
23	rs5945619	51498820	4	DOMDEV	242	NA	NA	NA	NA	NA	NA
23	rs5945619	51498820	4	C2	242	NA	NA	NA	NA	NA	NA
23	rs5945619	51498820	4	GENO_2DF	242	NA	NA	NA	NA	NA	NA
23	rs5919432	67801708	4	ADD	244	NA	NA	NA	NA	NA	NA
23	rs5919432	67801708	4	DOMDEV	244	NA	NA	NA	NA	NA	NA
23	rs5919432	67801708	4	C2	244	NA	NA	NA	NA	NA	NA
23	rs5919432	67801708	4	GENO_2DF	244	NA	NA	NA	NA	NA	NA

## Sheet: BMI_Agg_vs_NAgg_Adjusted
CHR	SNP	UNADJ	GC	BONF	HOLM	SIDAK_SS	SIDAK_SD	FDR_BH	FDR_BY
2	rs632148	0.01134	0.01134	1	1	0.6767	0.6767	0.9445	1
20	rs3918256	0.0324	0.0324	1	1	0.9616	0.9603	0.9445	1
7	rs10244329	0.03593	0.03593	1	1	0.9733	0.9713	0.9445	1
7	rs3735035	0.03816	0.03816	1	1	0.9788	0.9761	0.9445	1
11	rs10896438	0.0624	0.0624	1	1	0.9983	0.9978	1	1
17	rs8066956	0.08145	0.08145	1	1	0.9998	0.9997	1	1
19	rs713041	0.08258	0.08258	1	1	0.9998	0.9997	1	1
10	rs4962416	0.09426	0.09426	1	1	0.9999	0.9999	1	1
8	rs2294008	0.117	0.117	1	1	1	1	1	1
15	rs4965373	0.1281	0.1281	1	1	1	1	1	1
8	rs6983267	0.1358	0.1358	1	1	1	1	1	1
10	rs10740051	0.171	0.171	1	1	1	1	1	1
16	rs9939609	0.1914	0.1914	1	1	1	1	1	1
19	rs1354774	0.2245	0.2245	1	1	1	1	1	1
17	rs983085	0.2259	0.2259	1	1	1	1	1	1
20	rs2762939	0.2304	0.2304	1	1	1	1	1	1
6	rs130067	0.2313	0.2313	1	1	1	1	1	1
8	rs6470494	0.2419	0.2419	1	1	1	1	1	1
16	rs1529916	0.2511	0.2511	1	1	1	1	1	1
11	rs7931342	0.2963	0.2963	1	1	1	1	1	1
19	rs887391	0.2975	0.2975	1	1	1	1	1	1
11	rs11228565	0.3313	0.3313	1	1	1	1	1	1
19	rs1506684	0.3326	0.3326	1	1	1	1	1	1
11	rs1001179	0.3373	0.3373	1	1	1	1	1	1
11	rs7127900	0.3399	0.3399	1	1	1	1	1	1
17	rs799923	0.3476	0.3476	1	1	1	1	1	1
19	rs2659122	0.3518	0.3518	1	1	1	1	1	1
11	rs594519	0.3558	0.3558	1	1	1	1	1	1
17	rs1859962	0.3648	0.3648	1	1	1	1	1	1
12	rs2071358	0.3774	0.3774	1	1	1	1	1	1
17	rs4794758	0.3826	0.3826	1	1	1	1	1	1
5	rs2242652	0.3846	0.3846	1	1	1	1	1	1
4	rs12500426	0.3859	0.3859	1	1	1	1	1	1
5	rs3733890	0.3885	0.3885	1	1	1	1	1	1
5	rs2121875	0.4349	0.4349	1	1	1	1	1	1
4	rs17021918	0.4361	0.4361	1	1	1	1	1	1
3	rs1050450	0.4375	0.4375	1	1	1	1	1	1
8	rs2928679	0.4682	0.4682	1	1	1	1	1	1
17	rs1127678	0.4777	0.4777	1	1	1	1	1	1
12	rs7299460	0.4968	0.4968	1	1	1	1	1	1
11	rs174448	0.5353	0.5353	1	1	1	1	1	1
2	rs2710647	0.5429	0.5429	1	1	1	1	1	1
17	rs1016990	0.5447	0.5447	1	1	1	1	1	1
20	rs2296241	0.5487	0.5487	1	1	1	1	1	1
12	rs3782905	0.5737	0.5737	1	1	1	1	1	1
4	rs7679673	0.5953	0.5953	1	1	1	1	1	1
3	rs6763931	0.6157	0.6157	1	1	1	1	1	1
4	rs629242	0.6258	0.6258	1	1	1	1	1	1
7	rs12155172	0.6285	0.6285	1	1	1	1	1	1
3	rs4135275	0.6643	0.6643	1	1	1	1	1	1
8	rs13254738	0.666	0.666	1	1	1	1	1	1
5	rs3877899	0.6685	0.6685	1	1	1	1	1	1
1	rs1380576	0.6701	0.6701	1	1	1	1	1	1
10	rs12529	0.6911	0.6911	1	1	1	1	1	1
17	rs11545302	0.7107	0.7107	1	1	1	1	1	1
17	rs6502051	0.7211	0.7211	1	1	1	1	1	1
2	rs10187424	0.7235	0.7235	1	1	1	1	1	1
10	rs7920517	0.7239	0.7239	1	1	1	1	1	1
1	rs12042763	0.7332	0.7332	1	1	1	1	1	1
7	rs10486567	0.7368	0.7368	1	1	1	1	1	1
12	rs10875943	0.7405	0.7405	1	1	1	1	1	1
10	rs6162	0.7418	0.7418	1	1	1	1	1	1
8	rs6470517	0.7422	0.7422	1	1	1	1	1	1
3	rs1799977	0.7663	0.7663	1	1	1	1	1	1
17	rs3094509	0.7705	0.7705	1	1	1	1	1	1
3	rs10934853	0.786	0.786	1	1	1	1	1	1
19	rs8102476	0.7861	0.7861	1	1	1	1	1	1
12	rs2946834	0.7998	0.7998	1	1	1	1	1	1
8	rs1512268	0.8085	0.8085	1	1	1	1	1	1
8	rs16902094	0.8086	0.8086	1	1	1	1	1	1
8	rs7000448	0.8133	0.8133	1	1	1	1	1	1
7	rs6465657	0.8187	0.8187	1	1	1	1	1	1
12	rs6823	0.8227	0.8227	1	1	1	1	1	1
6	rs4880	0.8282	0.8282	1	1	1	1	1	1
12	rs902774	0.8317	0.8317	1	1	1	1	1	1
22	rs5759167	0.848	0.848	1	1	1	1	1	1
12	rs2279744	0.8554	0.8554	1	1	1	1	1	1
2	rs1465618	0.8653	0.8653	1	1	1	1	1	1
20	rs3787268	0.9138	0.9138	1	1	1	1	1	1
17	rs4054823	0.9204	0.9204	1	1	1	1	1	1
1	rs5845	0.9536	0.9536	1	1	1	1	1	1
19	rs2659056	0.9622	0.9622	1	1	1	1	1	1
2	rs2292884	0.9975	0.9975	1	1	1	1	1	1
8	rs1016343	0.9977	0.9977	1	1	1	1	1	1
2	rs721048	0.9979	0.9979	1	1	1	1	1	1
9	rs11536889	0.9985	0.9985	1	1	1	1	1	1
11	rs2727270	0.9989	0.9989	1	1	1	1	1	1
15	rs28665122	0.9991	0.9991	1	1	1	1	1	1
3	rs17793693	0.9993	0.9993	1	1	1	1	1	1
2	rs1056827	0.9993	0.9993	1	1	1	1	1	1
19	rs17632542	0.9993	0.9993	1	1	1	1	1	1
20	rs3787557	0.9993	0.9993	1	1	1	1	1	1
17	rs17552022	0.9993	0.9993	1	1	1	1	1	1
8	rs6983561	0.9994	0.9994	1	1	1	1	1	1
2	rs12621278	0.9994	0.9994	1	1	1	1	1	1
8	rs1378897	1	1	1	1	1	1	1	1
12	rs7965399	1	1	1	1	1	1	1	1
23	rs5945619	1	1	1	1	1	1	1	1
23	rs5919432	1	1	1	1	1	1	1	1

## Sheet: BMI_NAgg_vs_Control_OR
CHR	SNP	BP	A1	TEST	NMISS	OR	SE	L95	U95	STAT	P
1	rs5845	86863156	2	ADD	47	1	7503	0	inf	1.054e-18	1
1	rs5845	86863156	2	DOMDEV	47	1	9497	0	inf	-3.394e-19	1
1	rs5845	86863156	2	C2	47	1	10120	0	inf	3.668e-19	1
1	rs5845	86863156	2	GENO_2DF	47	NA	NA	NA	NA	1.28e-36	1
1	rs12042763	186682744	2	ADD	52	1	9189	0	inf	4.486e-19	1
1	rs12042763	186682744	2	DOMDEV	52	1	10380	0	inf	-3.359e-19	1
1	rs12042763	186682744	2	C2	52	1	10270	0	inf	5.239e-19	1
1	rs12042763	186682744	2	GENO_2DF	52	NA	NA	NA	NA	2.012e-37	1
1	rs1380576	204519150	4	ADD	23	1	7200	0	inf	-9.675e-19	1
1	rs1380576	204519150	4	DOMDEV	23	1	11230	0	inf	-5.461e-19	1
1	rs1380576	204519150	4	C2	23	1	13720	0	inf	-1.678e-18	1
1	rs1380576	204519150	4	GENO_2DF	23	NA	NA	NA	NA	1.655e-36	1
2	rs632148	31580962	4	ADD	47	1	5494	0	inf	7.127e-20	1
2	rs632148	31580962	4	DOMDEV	47	1	7542	0	inf	-5.704e-20	1
2	rs632148	31580962	4	C2	47	1	10170	0	inf	6.348e-19	1
2	rs632148	31580962	4	GENO_2DF	47	NA	NA	NA	NA	6.526e-39	1
2	rs1056827	38075034	2	ADD	8	NA	NA	NA	NA	NA	NA
2	rs1056827	38075034	2	DOMDEV	8	NA	NA	NA	NA	NA	NA
2	rs1056827	38075034	2	C2	8	NA	NA	NA	NA	NA	NA
2	rs1056827	38075034	2	GENO_2DF	8	NA	NA	NA	NA	NA	NA
2	rs1465618	43326810	1	ADD	55	1	9093	0	inf	3.71e-19	1
2	rs1465618	43326810	1	DOMDEV	55	1	10510	0	inf	-5.257e-19	1
2	rs1465618	43326810	1	C2	55	1	10130	0	inf	1.068e-18	1
2	rs1465618	43326810	1	GENO_2DF	55	NA	NA	NA	NA	2.793e-37	1
2	rs721048	62904596	1	ADD	57	NA	NA	NA	NA	NA	NA
2	rs721048	62904596	1	DOMDEV	57	NA	NA	NA	NA	NA	NA
2	rs721048	62904596	1	C2	57	NA	NA	NA	NA	NA	NA
2	rs721048	62904596	1	GENO_2DF	57	NA	NA	NA	NA	NA	NA
2	rs2710647	63213970	2	ADD	56	1	4656	0	inf	-2.705e-18	1
2	rs2710647	63213970	2	DOMDEV	56	1	6686	0	inf	-6.118e-19	1
2	rs2710647	63213970	2	C2	56	1	9512	0	inf	-1.24e-18	1
2	rs2710647	63213970	2	GENO_2DF	56	NA	NA	NA	NA	8.08e-36	1
2	rs10187424	85567174	4	ADD	55	1	5075	0	inf	-1.479e-18	1
2	rs10187424	85567174	4	DOMDEV	55	1	7005	0	inf	-3.743e-19	1
2	rs10187424	85567174	4	C2	55	1	10590	0	inf	-8.032e-19	1
2	rs10187424	85567174	4	GENO_2DF	55	NA	NA	NA	NA	2.802e-36	1
2	rs12621278	172446825	3	ADD	22	NA	NA	NA	NA	NA	NA
2	rs12621278	172446825	3	DOMDEV	22	NA	NA	NA	NA	NA	NA
2	rs12621278	172446825	3	C2	22	NA	NA	NA	NA	NA	NA
2	rs12621278	172446825	3	GENO_2DF	22	NA	NA	NA	NA	NA	NA
2	rs2292884	238443226	3	ADD	56	NA	NA	NA	NA	NA	NA
2	rs2292884	238443226	3	DOMDEV	56	NA	NA	NA	NA	NA	NA
2	rs2292884	238443226	3	C2	56	NA	NA	NA	NA	NA	NA
2	rs2292884	238443226	3	GENO_2DF	56	NA	NA	NA	NA	NA	NA
3	rs17793693	12345971	1	ADD	45	1	12360	0	inf	-7.043e-20	1
3	rs17793693	12345971	1	DOMDEV	45	1	21210	0	inf	8.264e-20	1
3	rs17793693	12345971	1	C2	45	1	10090	0	inf	-7.016e-19	1
3	rs17793693	12345971	1	GENO_2DF	45	NA	NA	NA	NA	7.723e-39	1
3	rs4135275	12443844	3	ADD	53	1	8890	0	inf	2.749e-19	1
3	rs4135275	12443844	3	DOMDEV	53	1	10770	0	inf	-1.221e-18	1
3	rs4135275	12443844	3	C2	53	1	10340	0	inf	-2.852e-18	1
3	rs4135275	12443844	3	GENO_2DF	53	NA	NA	NA	NA	2.338e-36	1
3	rs1799977	37012077	3	ADD	57	1	5072	0	inf	6.904e-19	1
3	rs1799977	37012077	3	DOMDEV	57	1	7795	0	inf	4.082e-19	1
3	rs1799977	37012077	3	C2	57	1	9305	0	inf	1.973e-18	1
3	rs1799977	37012077	3	GENO_2DF	57	NA	NA	NA	NA	1.073e-36	1
3	rs1050450	49357401	2	ADD	46	1	5407	0	inf	8.918e-19	1
3	rs1050450	49357401	2	DOMDEV	46	1	7864	0	inf	7.689e-20	1
3	rs1050450	49357401	2	C2	46	1	10200	0	inf	3.466e-19	1
3	rs1050450	49357401	2	GENO_2DF	46	NA	NA	NA	NA	9.671e-37	1
3	rs10934853	128319530	1	ADD	52	1	5921	0	inf	-6.59e-19	1
3	rs10934853	128319530	1	DOMDEV	52	1	8758	0	inf	-2.005e-19	1
3	rs10934853	128319530	1	C2	52	1	10090	0	inf	3.004e-18	1
3	rs10934853	128319530	1	GENO_2DF	52	NA	NA	NA	NA	7.848e-37	1
3	rs6763931	141383991	1	ADD	56	1	4912	0	inf	-9.668e-19	1
3	rs6763931	141383991	1	DOMDEV	56	1	6664	0	inf	-1.105e-19	1
3	rs6763931	141383991	1	C2	56	1	9435	0	inf	1.013e-18	1
3	rs6763931	141383991	1	GENO_2DF	56	NA	NA	NA	NA	9.722e-37	1
4	rs629242	56276871	2	ADD	56	1	7336	0	inf	1.022e-18	1
4	rs629242	56276871	2	DOMDEV	56	1	9728	0	inf	-2.089e-18	1
4	rs629242	56276871	2	C2	56	1	9389	0	inf	-4.373e-18	1
4	rs629242	56276871	2	GENO_2DF	56	NA	NA	NA	NA	4.561e-36	1
4	rs12500426	94593458	1	ADD	52	1	4880	0	inf	-1.187e-18	1
4	rs12500426	94593458	1	DOMDEV	52	1	6787	0	inf	-7.16e-20	1
4	rs12500426	94593458	1	C2	52	1	9931	0	inf	-6.707e-20	1
4	rs12500426	94593458	1	GENO_2DF	52	NA	NA	NA	NA	1.411e-36	1
4	rs17021918	94641726	2	ADD	55	1	5964	0	inf	7.621e-19	1
4	rs17021918	94641726	2	DOMDEV	55	1	8043	0	inf	-5.471e-19	1
4	rs17021918	94641726	2	C2	55	1	10320	0	inf	-8.404e-19	1
4	rs17021918	94641726	2	GENO_2DF	55	NA	NA	NA	NA	6.204e-37	1
4	rs7679673	105140377	1	ADD	53	1	5302	0	inf	1.09e-18	1
4	rs7679673	105140377	1	DOMDEV	53	1	7397	0	inf	-5.381e-19	1
4	rs7679673	105140377	1	C2	53	1	10030	0	inf	-1.766e-18	1
4	rs7679673	105140377	1	GENO_2DF	53	NA	NA	NA	NA	1.201e-36	1
5	rs2242652	1279913	2	ADD	56	1	12360	0	inf	-2.115e-18	1
5	rs2242652	1279913	2	DOMDEV	56	1	14220	0	inf	1.725e-18	1
5	rs2242652	1279913	2	C2	56	1	9553	0	inf	1.403e-18	1
5	rs2242652	1279913	2	GENO_2DF	56	NA	NA	NA	NA	4.475e-36	1
5	rs3877899	42801166	1	ADD	46	1	6582	0	inf	-4.095e-19	1
5	rs3877899	42801166	1	DOMDEV	46	1	8945	0	inf	-1.746e-19	1
5	rs3877899	42801166	1	C2	46	1	10090	0	inf	-1.483e-18	1
5	rs3877899	42801166	1	GENO_2DF	46	NA	NA	NA	NA	3.835e-37	1
5	rs2121875	44365443	3	ADD	56	1	5345	0	inf	-1.261e-18	1
5	rs2121875	44365443	3	DOMDEV	56	1	7116	0	inf	4.467e-19	1
5	rs2121875	44365443	3	C2	56	1	9461	0	inf	-1.875e-18	1
5	rs2121875	44365443	3	GENO_2DF	56	NA	NA	NA	NA	1.592e-36	1
5	rs3733890	79126136	1	ADD	55	1	8949	0	inf	-1.05e-18	1
5	rs3733890	79126136	1	DOMDEV	55	1	10180	0	inf	-9.325e-20	1
5	rs3733890	79126136	1	C2	55	1	9910	0	inf	-3.077e-19	1
5	rs3733890	79126136	1	GENO_2DF	55	NA	NA	NA	NA	2.996e-36	1
6	rs130067	31150734	4	ADD	55	1	8867	0	inf	-1.631e-18	1
6	rs130067	31150734	4	DOMDEV	55	1	11000	0	inf	1.159e-18	1
6	rs130067	31150734	4	C2	55	1	9355	0	inf	-1.788e-18	1
6	rs130067	31150734	4	GENO_2DF	55	NA	NA	NA	NA	2.663e-36	1
6	rs4880	159692840	2	ADD	47	1	4950	0	inf	8.133e-19	1
6	rs4880	159692840	2	DOMDEV	47	1	7153	0	inf	3.059e-19	1
6	rs4880	159692840	2	C2	47	1	10070	0	inf	7.401e-20	1
6	rs4880	159692840	2	GENO_2DF	47	NA	NA	NA	NA	7.993e-37	1
7	rs12155172	20954872	1	ADD	52	1	6473	0	inf	-1.544e-19	1
7	rs12155172	20954872	1	DOMDEV	52	1	9369	0	inf	-8.68e-20	1
7	rs12155172	20954872	1	C2	52	1	9971	0	inf	-2.413e-18	1
7	rs12155172	20954872	1	GENO_2DF	52	NA	NA	NA	NA	6.643e-38	1
7	rs10486567	27936944	1	ADD	54	1	8914	0	inf	-1.339e-18	1
7	rs10486567	27936944	1	DOMDEV	54	1	10450	0	inf	8.657e-19	1
7	rs10486567	27936944	1	C2	54	1	9515	0	inf	1.345e-18	1
7	rs10486567	27936944	1	GENO_2DF	54	NA	NA	NA	NA	1.841e-36	1
7	rs6465657	98187015	4	ADD	53	1	4900	0	inf	-8.676e-19	1
7	rs6465657	98187015	4	DOMDEV	53	1	6714	0	inf	1.421e-19	1
7	rs6465657	98187015	4	C2	53	1	9937	0	inf	1.997e-18	1
7	rs6465657	98187015	4	GENO_2DF	53	NA	NA	NA	NA	7.671e-37	1
7	rs10244329	128248636	2	ADD	24	1	9924	0	inf	-9.351e-19	1
7	rs10244329	128248636	2	DOMDEV	24	1	11060	0	inf	-7.996e-19	1
7	rs10244329	128248636	2	C2	24	1	15800	0	inf	-1.694e-19	1
7	rs10244329	128248636	2	GENO_2DF	24	NA	NA	NA	NA	1.088e-36	1
7	rs3735035	131195959	2	ADD	52	1	4976	0	inf	-1.845e-20	1
7	rs3735035	131195959	2	DOMDEV	52	1	6984	0	inf	-2.016e-19	1
7	rs3735035	131195959	2	C2	52	1	9930	0	inf	-4.462e-19	1
7	rs3735035	131195959	2	GENO_2DF	52	NA	NA	NA	NA	4.157e-38	1
8	rs2928679	23438975	2	ADD	53	1	5232	0	inf	-5.763e-19	1
8	rs2928679	23438975	2	DOMDEV	53	1	6980	0	inf	4.377e-19	1
8	rs2928679	23438975	2	C2	53	1	9932	0	inf	-1.014e-18	1
8	rs2928679	23438975	2	GENO_2DF	53	NA	NA	NA	NA	4.191e-37	1
8	rs1512268	23668950	1	ADD	54	1	5191	0	inf	6.431e-19	1
8	rs1512268	23668950	1	DOMDEV	54	1	6988	0	inf	-2.953e-19	1
8	rs1512268	23668950	1	C2	54	1	10010	0	inf	-8.427e-19	1
8	rs1512268	23668950	1	GENO_2DF	54	NA	NA	NA	NA	4.286e-37	1
8	rs1016343	127081052	2	ADD	52	NA	NA	NA	NA	NA	NA
8	rs1016343	127081052	2	DOMDEV	52	NA	NA	NA	NA	NA	NA
8	rs1016343	127081052	2	C2	52	NA	NA	NA	NA	NA	NA
8	rs1016343	127081052	2	GENO_2DF	52	NA	NA	NA	NA	NA	NA
8	rs13254738	127092098	4	ADD	52	1	6667	0	inf	5.137e-19	1
8	rs13254738	127092098	4	DOMDEV	52	1	8255	0	inf	-4.971e-19	1
8	rs13254738	127092098	4	C2	52	1	10130	0	inf	1.087e-18	1
8	rs13254738	127092098	4	GENO_2DF	52	NA	NA	NA	NA	3.281e-37	1
8	rs6983561	127094635	4	ADD	56	NA	NA	NA	NA	NA	NA
8	rs6983561	127094635	4	DOMDEV	56	NA	NA	NA	NA	NA	NA
8	rs6983561	127094635	4	C2	56	NA	NA	NA	NA	NA	NA
8	rs6983561	127094635	4	GENO_2DF	56	NA	NA	NA	NA	NA	NA
8	rs1378897	127110414	1	ADD	56	NA	NA	NA	NA	NA	NA
8	rs1378897	127110414	1	DOMDEV	56	NA	NA	NA	NA	NA	NA
8	rs1378897	127110414	1	C2	56	NA	NA	NA	NA	NA	NA
8	rs1378897	127110414	1	GENO_2DF	56	NA	NA	NA	NA	NA	NA
8	rs16902094	127308101	3	ADD	54	1	12390	0	inf	6.823e-19	1
8	rs16902094	127308101	3	DOMDEV	54	1	13500	0	inf	-4.248e-19	1
8	rs16902094	127308101	3	C2	54	1	9894	0	inf	-1.859e-18	1
8	rs16902094	127308101	3	GENO_2DF	54	NA	NA	NA	NA	5.717e-37	1
8	rs6983267	127401060	2	ADD	55	1	4191	0	inf	-1.31e-18	1
8	rs6983267	127401060	2	DOMDEV	55	1	6786	0	inf	-7.494e-19	1
8	rs6983267	127401060	2	C2	55	1	9915	0	inf	-2.093e-18	1
8	rs6983267	127401060	2	GENO_2DF	55	NA	NA	NA	NA	2.266e-36	1
8	rs7000448	127428925	2	ADD	52	1	5251	0	inf	-3.781e-19	1
8	rs7000448	127428925	2	DOMDEV	52	1	7745	0	inf	2.734e-19	1
8	rs7000448	127428925	2	C2	52	1	10180	0	inf	-1.334e-18	1
8	rs7000448	127428925	2	GENO_2DF	52	NA	NA	NA	NA	1.604e-37	1
8	rs6470517	127448159	3	ADD	46	1	12390	0	inf	1.214e-19	1
8	rs6470517	127448159	3	DOMDEV	46	1	14820	0	inf	3.091e-19	1
8	rs6470517	127448159	3	C2	46	1	10900	0	inf	-2.799e-18	1
8	rs6470517	127448159	3	GENO_2DF	46	NA	NA	NA	NA	4.355e-37	1
8	rs6470494	128087904	2	ADD	53	1	8950	0	inf	3.94e-19	1
8	rs6470494	128087904	2	DOMDEV	53	1	10280	0	inf	3.574e-19	1
8	rs6470494	128087904	2	C2	53	1	9922	0	inf	-6.975e-19	1
8	rs6470494	128087904	2	GENO_2DF	53	NA	NA	NA	NA	1.147e-36	1
8	rs2294008	142680513	2	ADD	53	1	4993	0	inf	-1.023e-18	1
8	rs2294008	142680513	2	DOMDEV	53	1	6728	0	inf	1.161e-18	1
8	rs2294008	142680513	2	C2	53	1	9926	0	inf	1.88e-18	1
8	rs2294008	142680513	2	GENO_2DF	53	NA	NA	NA	NA	2.399e-36	1
9	rs11536889	117715853	4	ADD	56	NA	NA	NA	NA	NA	NA
9	rs11536889	117715853	4	DOMDEV	56	NA	NA	NA	NA	NA	NA
9	rs11536889	117715853	4	C2	56	NA	NA	NA	NA	NA	NA
9	rs11536889	117715853	4	GENO_2DF	56	NA	NA	NA	NA	NA	NA
10	rs12529	5136651	3	ADD	57	1	4818	0	inf	7.911e-20	1
10	rs12529	5136651	3	DOMDEV	57	1	6863	0	inf	-5.288e-19	1
10	rs12529	5136651	3	C2	57	1	9919	0	inf	-2.155e-18	1
10	rs12529	5136651	3	GENO_2DF	57	NA	NA	NA	NA	2.807e-37	1
10	rs10740051	46025670	1	ADD	52	1	5629	0	inf	5.228e-19	1
10	rs10740051	46025670	1	DOMDEV	52	1	7899	0	inf	-4.459e-19	1
10	rs10740051	46025670	1	C2	52	1	10280	0	inf	1.299e-18	1
10	rs10740051	46025670	1	GENO_2DF	52	NA	NA	NA	NA	3.272e-37	1
10	rs7920517	46063201	1	ADD	53	1	4503	0	inf	-1.975e-19	1
10	rs7920517	46063201	1	DOMDEV	53	1	6839	0	inf	1e-18	1
10	rs7920517	46063201	1	C2	53	1	10220	0	inf	1.277e-18	1
10	rs7920517	46063201	1	GENO_2DF	53	NA	NA	NA	NA	1.06e-36	1
10	rs6162	102837224	1	ADD	57	1	5190	0	inf	-1.36e-18	1
10	rs6162	102837224	1	DOMDEV	57	1	6852	0	inf	1.716e-19	1
10	rs6162	102837224	1	C2	57	1	9448	0	inf	-6.251e-20	1
10	rs6162	102837224	1	GENO_2DF	57	NA	NA	NA	NA	1.897e-36	1
10	rs4962416	125008303	4	ADD	55	1	4859	0	inf	2.391e-19	1
10	rs4962416	125008303	4	DOMDEV	55	1	8019	0	inf	-1.468e-19	1
10	rs4962416	125008303	4	C2	55	1	10010	0	inf	1.41e-18	1
10	rs4962416	125008303	4	GENO_2DF	55	NA	NA	NA	NA	6.091e-38	1
11	rs7127900	2212344	1	ADD	54	1	8899	0	inf	7.344e-19	1
11	rs7127900	2212344	1	DOMDEV	54	1	10570	0	inf	-1.012e-18	1
11	rs7127900	2212344	1	C2	54	1	9917	0	inf	-6.888e-19	1
11	rs7127900	2212344	1	GENO_2DF	54	NA	NA	NA	NA	1.026e-36	1
11	rs1001179	34438684	2	ADD	47	1	12450	0	inf	-1.897e-18	1
11	rs1001179	34438684	2	DOMDEV	47	1	13580	0	inf	1.477e-18	1
11	rs1001179	34438684	2	C2	47	1	10010	0	inf	6.27e-19	1
11	rs1001179	34438684	2	GENO_2DF	47	NA	NA	NA	NA	3.663e-36	1
11	rs594519	56305228	2	ADD	56	1	12380	0	inf	-1.388e-18	1
11	rs594519	56305228	2	DOMDEV	56	1	13530	0	inf	1.306e-18	1
11	rs594519	56305228	2	C2	56	1	9324	0	inf	-1.347e-18	1
11	rs594519	56305228	2	GENO_2DF	56	NA	NA	NA	NA	1.972e-36	1
11	rs2727270	61603237	2	ADD	56	NA	NA	NA	NA	NA	NA
11	rs2727270	61603237	2	DOMDEV	56	NA	NA	NA	NA	NA	NA
11	rs2727270	61603237	2	C2	56	NA	NA	NA	NA	NA	NA
11	rs2727270	61603237	2	GENO_2DF	56	NA	NA	NA	NA	NA	NA
11	rs174448	61872101	4	ADD	55	1	6150	0	inf	2.224e-18	1
11	rs174448	61872101	4	DOMDEV	55	1	7881	0	inf	-1.148e-18	1
11	rs174448	61872101	4	C2	55	1	9712	0	inf	2.049e-18	1
11	rs174448	61872101	4	GENO_2DF	55	NA	NA	NA	NA	4.945e-36	1
11	rs10896438	69139102	3	ADD	57	1	6588	0	inf	-1.209e-18	1
11	rs10896438	69139102	3	DOMDEV	57	1	8096	0	inf	-2.443e-19	1
11	rs10896438	69139102	3	C2	57	1	9385	0	inf	3.816e-19	1
11	rs10896438	69139102	3	GENO_2DF	57	NA	NA	NA	NA	2.909e-36	1
11	rs11228565	69211113	1	ADD	55	1	8858	0	inf	4.783e-19	1
11	rs11228565	69211113	1	DOMDEV	55	1	10950	0	inf	2.964e-19	1
11	rs11228565	69211113	1	C2	55	1	10160	0	inf	7.788e-20	1
11	rs11228565	69211113	1	GENO_2DF	55	NA	NA	NA	NA	1.135e-36	1
11	rs7931342	69227030	2	ADD	54	1	5326	0	inf	-1.585e-18	1
11	rs7931342	69227030	2	DOMDEV	54	1	6832	0	inf	-4.308e-19	1
11	rs7931342	69227030	2	C2	54	1	9910	0	inf	-5.23e-19	1
11	rs7931342	69227030	2	GENO_2DF	54	NA	NA	NA	NA	2.752e-36	1
12	rs3782905	47872384	3	ADD	49	1	5401	0	inf	1.186e-18	1
12	rs3782905	47872384	3	DOMDEV	49	1	7604	0	inf	5.271e-19	1
12	rs3782905	47872384	3	C2	49	1	9626	0	inf	2.813e-19	1
12	rs3782905	47872384	3	GENO_2DF	49	NA	NA	NA	NA	2.458e-36	1
12	rs7299460	48296268	2	ADD	52	1	6498	0	inf	2.536e-19	1
12	rs7299460	48296268	2	DOMDEV	52	1	8909	0	inf	6.928e-19	1
12	rs7299460	48296268	2	C2	52	1	10930	0	inf	1.869e-18	1
12	rs7299460	48296268	2	GENO_2DF	52	NA	NA	NA	NA	1.101e-36	1
12	rs6823	48362412	3	ADD	52	1	5091	0	inf	5.373e-19	1
12	rs6823	48362412	3	DOMDEV	52	1	6937	0	inf	-3.707e-19	1
12	rs6823	48362412	3	C2	52	1	10050	0	inf	-7.108e-19	1
12	rs6823	48362412	3	GENO_2DF	52	NA	NA	NA	NA	3.565e-37	1
12	rs2071358	48366449	1	ADD	56	1	8871	0	inf	3.958e-20	1
12	rs2071358	48366449	1	DOMDEV	56	1	10670	0	inf	2.948e-19	1
12	rs2071358	48366449	1	C2	56	1	9442	0	inf	1.506e-18	1
12	rs2071358	48366449	1	GENO_2DF	56	NA	NA	NA	NA	2.421e-37	1
12	rs10875943	49282227	4	ADD	55	1	6506	0	inf	-3.351e-19	1
12	rs10875943	49282227	4	DOMDEV	55	1	8581	0	inf	-5.18e-19	1
12	rs10875943	49282227	4	C2	55	1	9555	0	inf	-2.345e-18	1
12	rs10875943	49282227	4	GENO_2DF	55	NA	NA	NA	NA	9.025e-37	1
12	rs902774	52880120	1	ADD	55	1	12370	0	inf	1.332e-18	1
12	rs902774	52880120	1	DOMDEV	55	1	13980	0	inf	-8.703e-19	1
12	rs902774	52880120	1	C2	55	1	10140	0	inf	-1.246e-18	1
12	rs902774	52880120	1	GENO_2DF	55	NA	NA	NA	NA	1.959e-36	1
12	rs2279744	68808800	3	ADD	53	1	5683	0	inf	-6.066e-19	1
12	rs2279744	68808800	3	DOMDEV	53	1	7484	0	inf	3.084e-19	1
12	rs2279744	68808800	3	C2	53	1	9482	0	inf	-1.41e-18	1
12	rs2279744	68808800	3	GENO_2DF	53	NA	NA	NA	NA	3.705e-37	1
12	rs2946834	102394036	2	ADD	55	1	6021	0	inf	-3.144e-19	1
12	rs2946834	102394036	2	DOMDEV	55	1	7763	0	inf	-6.62e-19	1
12	rs2946834	102394036	2	C2	55	1	9444	0	inf	-5.11e-19	1
12	rs2946834	102394036	2	GENO_2DF	55	NA	NA	NA	NA	1.03e-36	1
12	rs7965399	102497908	4	ADD	57	NA	NA	NA	NA	NA	NA
12	rs7965399	102497908	4	DOMDEV	57	NA	NA	NA	NA	NA	NA
12	rs7965399	102497908	4	C2	57	NA	NA	NA	NA	NA	NA
12	rs7965399	102497908	4	GENO_2DF	57	NA	NA	NA	NA	NA	NA
15	rs28665122	101277522	1	ADD	46	NA	NA	NA	NA	NA	NA
15	rs28665122	101277522	1	DOMDEV	46	NA	NA	NA	NA	NA	NA
15	rs28665122	101277522	1	C2	46	NA	NA	NA	NA	NA	NA
15	rs28665122	101277522	1	GENO_2DF	46	NA	NA	NA	NA	NA	NA
15	rs4965373	101812395	1	ADD	47	1	9070	0	inf	6.53e-19	1
15	rs4965373	101812395	1	DOMDEV	47	1	11160	0	inf	-4.898e-19	1
15	rs4965373	101812395	1	C2	47	1	10320	0	inf	9.784e-19	1
15	rs4965373	101812395	1	GENO_2DF	47	NA	NA	NA	NA	4.267e-37	1
16	rs1529916	8897333	2	ADD	52	1	8950	0	inf	2.725e-19	1
16	rs1529916	8897333	2	DOMDEV	52	1	10350	0	inf	-5.803e-19	1
16	rs1529916	8897333	2	C2	52	1	9977	0	inf	-1.685e-18	1
16	rs1529916	8897333	2	GENO_2DF	52	NA	NA	NA	NA	3.974e-37	1
16	rs9939609	53786615	1	ADD	56	1	4250	0	inf	-6.711e-19	1
16	rs9939609	53786615	1	DOMDEV	56	1	6846	0	inf	5.502e-19	1
16	rs9939609	53786615	1	C2	56	1	9495	0	inf	-1.659e-19	1
16	rs9939609	53786615	1	GENO_2DF	56	NA	NA	NA	NA	6.767e-37	1
17	rs11545302	12899963	3	ADD	53	1	6510	0	inf	8.49e-19	1
17	rs11545302	12899963	3	DOMDEV	53	1	8882	0	inf	4.261e-19	1
17	rs11545302	12899963	3	C2	53	1	9901	0	inf	1.977e-18	1
17	rs11545302	12899963	3	GENO_2DF	53	NA	NA	NA	NA	1.944e-36	1
17	rs17552022	12994978	4	ADD	56	NA	NA	NA	NA	NA	NA
17	rs17552022	12994978	4	DOMDEV	56	NA	NA	NA	NA	NA	NA
17	rs17552022	12994978	4	C2	56	NA	NA	NA	NA	NA	NA
17	rs17552022	12994978	4	GENO_2DF	56	NA	NA	NA	NA	NA	NA
17	rs4054823	13721707	4	ADD	56	1	4543	0	inf	1.138e-19	1
17	rs4054823	13721707	4	DOMDEV	56	1	6807	0	inf	-4.147e-19	1
17	rs4054823	13721707	4	C2	56	1	9804	0	inf	-2.191e-18	1
17	rs4054823	13721707	4	GENO_2DF	56	NA	NA	NA	NA	1.809e-37	1
17	rs3094509	37702294	2	ADD	56	1	4653	0	inf	5.577e-19	1
17	rs3094509	37702294	2	DOMDEV	56	1	7403	0	inf	-1.42e-19	1
17	rs3094509	37702294	2	C2	56	1	9323	0	inf	1.114e-18	1
17	rs3094509	37702294	2	GENO_2DF	56	NA	NA	NA	NA	3.132e-37	1
17	rs4794758	37720433	2	ADD	57	1	7399	0	inf	-6.701e-21	1
17	rs4794758	37720433	2	DOMDEV	57	1	9324	0	inf	-5.154e-19	1
17	rs4794758	37720433	2	C2	57	1	9403	0	inf	1.145e-18	1
17	rs4794758	37720433	2	GENO_2DF	57	NA	NA	NA	NA	4.857e-37	1
17	rs1016990	37728924	3	ADD	56	1	4908	0	inf	-6.469e-19	1
17	rs1016990	37728924	3	DOMDEV	56	1	7599	0	inf	6.884e-19	1
17	rs1016990	37728924	3	C2	56	1	9817	0	inf	-2.392e-18	1
17	rs1016990	37728924	3	GENO_2DF	56	NA	NA	NA	NA	6.575e-37	1
17	rs799923	41251931	1	ADD	56	1	8879	0	inf	4.156e-19	1
17	rs799923	41251931	1	DOMDEV	56	1	10600	0	inf	1.119e-19	1
17	rs799923	41251931	1	C2	56	1	9345	0	inf	-3.928e-19	1
17	rs799923	41251931	1	GENO_2DF	56	NA	NA	NA	NA	5.875e-37	1
17	rs983085	69212061	3	ADD	54	1	4767	0	inf	1.702e-18	1
17	rs983085	69212061	3	DOMDEV	54	1	6887	0	inf	-4.319e-19	1
17	rs983085	69212061	3	C2	54	1	9980	0	inf	4.427e-18	1
17	rs983085	69212061	3	GENO_2DF	54	NA	NA	NA	NA	2.901e-36	1
17	rs1859962	71112612	3	ADD	54	1	4645	0	inf	3.777e-19	1
17	rs1859962	71112612	3	DOMDEV	54	1	6731	0	inf	-8.242e-20	1
17	rs1859962	71112612	3	C2	54	1	10050	0	inf	1.802e-18	1
17	rs1859962	71112612	3	GENO_2DF	54	NA	NA	NA	NA	1.542e-37	1
17	rs8066956	80034443	2	ADD	53	1	5925	0	inf	5.938e-19	1
17	rs8066956	80034443	2	DOMDEV	53	1	8077	0	inf	5.415e-19	1
17	rs8066956	80034443	2	C2	53	1	9929	0	inf	1.742e-18	1
17	rs8066956	80034443	2	GENO_2DF	53	NA	NA	NA	NA	1.328e-36	1
17	rs6502051	80059332	1	ADD	53	1	5113	0	inf	1.136e-18	1
17	rs6502051	80059332	1	DOMDEV	53	1	7103	0	inf	6.814e-20	1
17	rs6502051	80059332	1	C2	53	1	10020	0	inf	-8.217e-19	1
17	rs6502051	80059332	1	GENO_2DF	53	NA	NA	NA	NA	1.473e-36	1
17	rs1127678	82101611	1	ADD	22	1	12880	0	inf	-4.482e-19	1
17	rs1127678	82101611	1	DOMDEV	22	1	14750	0	inf	-1.585e-19	1
17	rs1127678	82101611	1	C2	22	1	15250	0	inf	-1.179e-18	1
17	rs1127678	82101611	1	GENO_2DF	22	NA	NA	NA	NA	6.445e-37	1
19	rs713041	1106616	2	ADD	47	1	6265	0	inf	-7.364e-19	1
19	rs713041	1106616	2	DOMDEV	47	1	7922	0	inf	-1.912e-19	1
19	rs713041	1106616	2	C2	47	1	10100	0	inf	-1.649e-18	1
19	rs713041	1106616	2	GENO_2DF	47	NA	NA	NA	NA	8.658e-37	1
19	rs8102476	38244973	2	ADD	56	1	5004	0	inf	-3.925e-19	1
19	rs8102476	38244973	2	DOMDEV	56	1	6754	0	inf	2.43e-19	1
19	rs8102476	38244973	2	C2	56	1	9425	0	inf	1.25e-18	1
19	rs8102476	38244973	2	GENO_2DF	56	NA	NA	NA	NA	1.781e-37	1
19	rs887391	41479716	4	ADD	55	1	7422	0	inf	-1.98e-20	1
19	rs887391	41479716	4	DOMDEV	55	1	9041	0	inf	-1.103e-18	1
19	rs887391	41479716	4	C2	55	1	9463	0	inf	-2.509e-18	1
19	rs887391	41479716	4	GENO_2DF	55	NA	NA	NA	NA	2.264e-36	1
19	rs2659056	50832687	3	ADD	56	1	6438	0	inf	4.128e-19	1
19	rs2659056	50832687	3	DOMDEV	56	1	9005	0	inf	-2.736e-19	1
19	rs2659056	50832687	3	C2	56	1	9674	0	inf	7.918e-19	1
19	rs2659056	50832687	3	GENO_2DF	56	NA	NA	NA	NA	1.723e-37	1
19	rs17632542	50858501	4	ADD	57	NA	NA	NA	NA	NA	NA
19	rs17632542	50858501	4	DOMDEV	57	NA	NA	NA	NA	NA	NA
19	rs17632542	50858501	4	C2	57	NA	NA	NA	NA	NA	NA
19	rs17632542	50858501	4	GENO_2DF	57	NA	NA	NA	NA	NA	NA
19	rs1354774	50889862	4	ADD	57	1	6046	0	inf	-1.048e-18	1
19	rs1354774	50889862	4	DOMDEV	57	1	7595	0	inf	7.724e-19	1
19	rs1354774	50889862	4	C2	57	1	9442	0	inf	2.06e-18	1
19	rs1354774	50889862	4	GENO_2DF	57	NA	NA	NA	NA	1.17e-36	1
19	rs2659122	51363026	3	ADD	56	1	7388	0	inf	-6.098e-19	1
19	rs2659122	51363026	3	DOMDEV	56	1	9230	0	inf	4.067e-19	1
19	rs2659122	51363026	3	C2	56	1	9397	0	inf	1.84e-18	1
19	rs2659122	51363026	3	GENO_2DF	56	NA	NA	NA	NA	3.718e-37	1
19	rs1506684	51371419	2	ADD	56	1	4642	0	inf	-2.578e-19	1
19	rs1506684	51371419	2	DOMDEV	56	1	6562	0	inf	1.435e-18	1
19	rs1506684	51371419	2	C2	56	1	9404	0	inf	1.917e-18	1
19	rs1506684	51371419	2	GENO_2DF	56	NA	NA	NA	NA	2.089e-36	1
20	rs3918256	44640959	3	ADD	56	1	6616	0	inf	5.33e-19	1
20	rs3918256	44640959	3	DOMDEV	56	1	8155	0	inf	3.276e-19	1
20	rs3918256	44640959	3	C2	56	1	9500	0	inf	-9.413e-19	1
20	rs3918256	44640959	3	GENO_2DF	56	NA	NA	NA	NA	8.961e-37	1
20	rs3787268	46013092	1	ADD	27	1	9112	0	inf	-4.842e-19	1
20	rs3787268	46013092	1	DOMDEV	27	1	13490	0	inf	7.679e-20	1
20	rs3787268	46013092	1	C2	27	1	18220	0	inf	3.584e-19	1
20	rs3787268	46013092	1	GENO_2DF	27	NA	NA	NA	NA	2.803e-37	1
20	rs3787557	52783135	4	ADD	56	NA	NA	NA	NA	NA	NA
20	rs3787557	52783135	4	DOMDEV	56	NA	NA	NA	NA	NA	NA
20	rs3787557	52783135	4	C2	56	NA	NA	NA	NA	NA	NA
20	rs3787557	52783135	4	GENO_2DF	56	NA	NA	NA	NA	NA	NA
20	rs2762939	54164712	4	ADD	56	1	12400	0	inf	5.763e-20	1
20	rs2762939	54164712	4	DOMDEV	56	1	13380	0	inf	5.942e-19	1
20	rs2762939	54164712	4	C2	56	1	9915	0	inf	-8.706e-19	1
20	rs2762939	54164712	4	GENO_2DF	56	NA	NA	NA	NA	1.683e-36	1
20	rs2296241	54169680	3	ADD	54	1	4941	0	inf	1.921e-19	1
20	rs2296241	54169680	3	DOMDEV	54	1	6726	0	inf	2.023e-19	1
20	rs2296241	54169680	3	C2	54	1	10100	0	inf	3.183e-20	1
20	rs2296241	54169680	3	GENO_2DF	54	NA	NA	NA	NA	7.405e-38	1
22	rs5759167	43104206	2	ADD	24	1	6882	0	inf	8.234e-20	1
22	rs5759167	43104206	2	DOMDEV	24	1	10350	0	inf	-9.322e-19	1
22	rs5759167	43104206	2	C2	24	1	14040	0	inf	-1.354e-18	1
22	rs5759167	43104206	2	GENO_2DF	24	NA	NA	NA	NA	8.748e-37	1
23	rs5945619	51498820	4	ADD	56	NA	NA	NA	NA	NA	NA
23	rs5945619	51498820	4	DOMDEV	56	NA	NA	NA	NA	NA	NA
23	rs5945619	51498820	4	C2	56	NA	NA	NA	NA	NA	NA
23	rs5945619	51498820	4	GENO_2DF	56	NA	NA	NA	NA	NA	NA
23	rs5919432	67801708	4	ADD	56	NA	NA	NA	NA	NA	NA
23	rs5919432	67801708	4	DOMDEV	56	NA	NA	NA	NA	NA	NA
23	rs5919432	67801708	4	C2	56	NA	NA	NA	NA	NA	NA
23	rs5919432	67801708	4	GENO_2DF	56	NA	NA	NA	NA	NA	NA

## Sheet: BMI_NAgg_vs_Control_Adjusted
CHR	SNP	UNADJ	GC	BONF	HOLM	SIDAK_SS	SIDAK_SD	FDR_BH	FDR_BY
17	rs4054823	1	1	1	1	1	1	1	1
17	rs17552022	1	1	1	1	1	1	1	1
17	rs11545302	1	1	1	1	1	1	1	1
16	rs9939609	1	1	1	1	1	1	1	1
16	rs1529916	1	1	1	1	1	1	1	1
15	rs4965373	1	1	1	1	1	1	1	1
15	rs28665122	1	1	1	1	1	1	1	1
12	rs7965399	1	1	1	1	1	1	1	1
12	rs2946834	1	1	1	1	1	1	1	1
12	rs2279744	1	1	1	1	1	1	1	1
12	rs902774	1	1	1	1	1	1	1	1
12	rs10875943	1	1	1	1	1	1	1	1
12	rs2071358	1	1	1	1	1	1	1	1
12	rs6823	1	1	1	1	1	1	1	1
12	rs7299460	1	1	1	1	1	1	1	1
12	rs3782905	1	1	1	1	1	1	1	1
11	rs7931342	1	1	1	1	1	1	1	1
11	rs11228565	1	1	1	1	1	1	1	1
11	rs10896438	1	1	1	1	1	1	1	1
11	rs174448	1	1	1	1	1	1	1	1
11	rs2727270	1	1	1	1	1	1	1	1
11	rs594519	1	1	1	1	1	1	1	1
11	rs1001179	1	1	1	1	1	1	1	1
11	rs7127900	1	1	1	1	1	1	1	1
23	rs5919432	1	1	1	1	1	1	1	1
23	rs5945619	1	1	1	1	1	1	1	1
22	rs5759167	1	1	1	1	1	1	1	1
20	rs2296241	1	1	1	1	1	1	1	1
20	rs2762939	1	1	1	1	1	1	1	1
20	rs3787557	1	1	1	1	1	1	1	1
20	rs3787268	1	1	1	1	1	1	1	1
20	rs3918256	1	1	1	1	1	1	1	1
19	rs1506684	1	1	1	1	1	1	1	1
19	rs2659122	1	1	1	1	1	1	1	1
19	rs1354774	1	1	1	1	1	1	1	1
19	rs17632542	1	1	1	1	1	1	1	1
19	rs2659056	1	1	1	1	1	1	1	1
19	rs887391	1	1	1	1	1	1	1	1
19	rs8102476	1	1	1	1	1	1	1	1
19	rs713041	1	1	1	1	1	1	1	1
17	rs1127678	1	1	1	1	1	1	1	1
17	rs6502051	1	1	1	1	1	1	1	1
17	rs8066956	1	1	1	1	1	1	1	1
17	rs1859962	1	1	1	1	1	1	1	1
17	rs983085	1	1	1	1	1	1	1	1
17	rs799923	1	1	1	1	1	1	1	1
17	rs1016990	1	1	1	1	1	1	1	1
17	rs4794758	1	1	1	1	1	1	1	1
17	rs3094509	1	1	1	1	1	1	1	1
5	rs3733890	1	1	1	1	1	1	1	1
5	rs2121875	1	1	1	1	1	1	1	1
5	rs3877899	1	1	1	1	1	1	1	1
5	rs2242652	1	1	1	1	1	1	1	1
4	rs7679673	1	1	1	1	1	1	1	1
4	rs17021918	1	1	1	1	1	1	1	1
4	rs12500426	1	1	1	1	1	1	1	1
4	rs629242	1	1	1	1	1	1	1	1
3	rs6763931	1	1	1	1	1	1	1	1
3	rs10934853	1	1	1	1	1	1	1	1
3	rs1050450	1	1	1	1	1	1	1	1
3	rs1799977	1	1	1	1	1	1	1	1
3	rs4135275	1	1	1	1	1	1	1	1
3	rs17793693	1	1	1	1	1	1	1	1
2	rs2292884	1	1	1	1	1	1	1	1
2	rs12621278	1	1	1	1	1	1	1	1
2	rs10187424	1	1	1	1	1	1	1	1
2	rs2710647	1	1	1	1	1	1	1	1
2	rs721048	1	1	1	1	1	1	1	1
2	rs1465618	1	1	1	1	1	1	1	1
2	rs1056827	1	1	1	1	1	1	1	1
2	rs632148	1	1	1	1	1	1	1	1
1	rs1380576	1	1	1	1	1	1	1	1
1	rs12042763	1	1	1	1	1	1	1	1
1	rs5845	1	1	1	1	1	1	1	1
10	rs4962416	1	1	1	1	1	1	1	1
10	rs6162	1	1	1	1	1	1	1	1
10	rs7920517	1	1	1	1	1	1	1	1
10	rs10740051	1	1	1	1	1	1	1	1
10	rs12529	1	1	1	1	1	1	1	1
9	rs11536889	1	1	1	1	1	1	1	1
8	rs2294008	1	1	1	1	1	1	1	1
8	rs6470494	1	1	1	1	1	1	1	1
8	rs6470517	1	1	1	1	1	1	1	1
8	rs7000448	1	1	1	1	1	1	1	1
8	rs6983267	1	1	1	1	1	1	1	1
8	rs16902094	1	1	1	1	1	1	1	1
8	rs1378897	1	1	1	1	1	1	1	1
8	rs6983561	1	1	1	1	1	1	1	1
8	rs13254738	1	1	1	1	1	1	1	1
8	rs1016343	1	1	1	1	1	1	1	1
8	rs1512268	1	1	1	1	1	1	1	1
8	rs2928679	1	1	1	1	1	1	1	1
7	rs3735035	1	1	1	1	1	1	1	1
7	rs10244329	1	1	1	1	1	1	1	1
7	rs6465657	1	1	1	1	1	1	1	1
7	rs10486567	1	1	1	1	1	1	1	1
7	rs12155172	1	1	1	1	1	1	1	1
6	rs4880	1	1	1	1	1	1	1	1
6	rs130067	1	1	1	1	1	1	1	1

## Sheet: Smoke_Agg_vs_Control_OR
CHR	SNP	BP	A1	TEST	NMISS	OR	SE	L95	U95	STAT	P
1	rs5845	86863156	2	ADD	507	0.657	0.2338	0.4155	1.039	-1.797	0.07232
1	rs5845	86863156	2	DOMDEV	507	1.249	0.2859	0.713	2.186	0.7766	0.4374
1	rs5845	86863156	2	C3	507	0.497	0.2005	0.3355	0.7363	-3.486	0.0004895
1	rs5845	86863156	2	GENO_2DF	507	NA	NA	NA	NA	3.621	0.1636
1	rs12042763	186682744	2	ADD	481	0.9781	0.2161	0.6403	1.494	-0.1027	0.9182
1	rs12042763	186682744	2	DOMDEV	481	1.339	0.2666	0.7938	2.257	1.094	0.2741
1	rs12042763	186682744	2	C3	481	0.5262	0.1911	0.3618	0.7653	-3.36	0.0007803
1	rs12042763	186682744	2	GENO_2DF	481	NA	NA	NA	NA	1.93	0.381
1	rs1380576	204519150	4	ADD	115	0.7444	0.3409	0.3816	1.452	-0.8658	0.3866
1	rs1380576	204519150	4	DOMDEV	115	1.343	0.4437	0.5631	3.205	0.6656	0.5057
1	rs1380576	204519150	4	C3	115	0.4859	0.4054	0.2195	1.075	-1.781	0.07497
1	rs1380576	204519150	4	GENO_2DF	115	NA	NA	NA	NA	0.8208	0.6634
2	rs632148	31580962	4	ADD	506	1.532	0.2184	0.9988	2.351	1.955	0.05063
2	rs632148	31580962	4	DOMDEV	506	0.6519	0.2651	0.3877	1.096	-1.614	0.1066
2	rs632148	31580962	4	C3	506	0.5326	0.1982	0.3612	0.7855	-3.179	0.00148
2	rs632148	31580962	4	GENO_2DF	506	NA	NA	NA	NA	4.012	0.1345
2	rs1056827	38075034	2	ADD	336	1.179	0.5326	0.415	3.348	0.3087	0.7575
2	rs1056827	38075034	2	DOMDEV	336	0.8244	0.6462	0.2323	2.926	-0.2988	0.7651
2	rs1056827	38075034	2	C3	336	0.7444	0.4443	0.3116	1.778	-0.6644	0.5065
2	rs1056827	38075034	2	GENO_2DF	336	NA	NA	NA	NA	0.1085	0.9472
2	rs1465618	43326810	1	ADD	494	1.025	0.2471	0.6314	1.663	0.09891	0.9212
2	rs1465618	43326810	1	DOMDEV	494	0.9277	0.2968	0.5185	1.66	-0.2529	0.8003
2	rs1465618	43326810	1	C3	494	0.5675	0.1873	0.3932	0.8192	-3.025	0.002488
2	rs1465618	43326810	1	GENO_2DF	494	NA	NA	NA	NA	0.08097	0.9603
2	rs721048	62904596	1	ADD	496	0.7467	0.2395	0.4669	1.194	-1.22	0.2226
2	rs721048	62904596	1	DOMDEV	496	1.477	0.2915	0.8342	2.615	1.338	0.1808
2	rs721048	62904596	1	C3	496	0.5467	0.1871	0.3789	0.7888	-3.228	0.001245
2	rs721048	62904596	1	GENO_2DF	496	NA	NA	NA	NA	1.921	0.3826
2	rs2710647	63213970	2	ADD	479	1.004	0.1403	0.7624	1.321	0.02606	0.9792
2	rs2710647	63213970	2	DOMDEV	479	0.944	0.1931	0.6465	1.378	-0.2986	0.7653
2	rs2710647	63213970	2	C3	479	0.5568	0.1899	0.3838	0.8079	-3.083	0.002049
2	rs2710647	63213970	2	GENO_2DF	479	NA	NA	NA	NA	0.09007	0.956
2	rs10187424	85567174	4	ADD	530	1.17	0.1406	0.8882	1.542	1.117	0.264
2	rs10187424	85567174	4	DOMDEV	530	0.938	0.1907	0.6455	1.363	-0.3355	0.7372
2	rs10187424	85567174	4	C3	530	0.5265	0.1847	0.3666	0.7561	-3.474	0.0005134
2	rs10187424	85567174	4	GENO_2DF	530	NA	NA	NA	NA	1.25	0.5353
2	rs12621278	172446825	3	ADD	319	1.305e-05	12190	0	inf	-0.0009227	0.9993
2	rs12621278	172446825	3	DOMDEV	319	66350	12190	0	inf	0.0009109	0.9993
2	rs12621278	172446825	3	C3	319	0.7719	0.2856	0.441	1.351	-0.9068	0.3645
2	rs12621278	172446825	3	GENO_2DF	319	NA	NA	NA	NA	0.1245	0.9396
2	rs2292884	238443226	3	ADD	535	0.9606	0.182	0.6724	1.373	-0.2205	0.8255
2	rs2292884	238443226	3	DOMDEV	535	1.028	0.2283	0.657	1.608	0.1197	0.9047
2	rs2292884	238443226	3	C3	535	0.5537	0.1828	0.387	0.7923	-3.233	0.001223
2	rs2292884	238443226	3	GENO_2DF	535	NA	NA	NA	NA	0.04881	0.9759
3	rs17793693	12345971	1	ADD	431	26640	12190	0	inf	0.000836	0.9993
3	rs17793693	12345971	1	DOMDEV	431	0.0001813	12190	0	inf	-0.0007068	0.9994
3	rs17793693	12345971	1	C3	431	0.5439	0.2098	0.3605	0.8205	-2.903	0.003697
3	rs17793693	12345971	1	GENO_2DF	431	NA	NA	NA	NA	12.33	0.002103
3	rs4135275	12443844	3	ADD	478	1.437	0.2647	0.8555	2.415	1.37	0.1706
3	rs4135275	12443844	3	DOMDEV	478	0.6926	0.3128	0.3752	1.278	-1.174	0.2402
3	rs4135275	12443844	3	C3	478	0.5818	0.1905	0.4005	0.8452	-2.843	0.004472
3	rs4135275	12443844	3	GENO_2DF	478	NA	NA	NA	NA	1.919	0.383
3	rs1799977	37012077	3	ADD	481	1.278	0.1632	0.9284	1.76	1.505	0.1324
3	rs1799977	37012077	3	DOMDEV	481	0.9951	0.2202	0.6463	1.532	-0.02241	0.9821
3	rs1799977	37012077	3	C3	481	0.5114	0.19	0.3524	0.7422	-3.529	0.0004172
3	rs1799977	37012077	3	GENO_2DF	481	NA	NA	NA	NA	2.911	0.2333
3	rs1050450	49357401	2	ADD	514	0.8333	0.1758	0.5904	1.176	-1.037	0.2995
3	rs1050450	49357401	2	DOMDEV	514	1.098	0.2314	0.6978	1.728	0.4046	0.6858
3	rs1050450	49357401	2	C3	514	0.5205	0.198	0.3531	0.7673	-3.297	0.0009763
3	rs1050450	49357401	2	GENO_2DF	514	NA	NA	NA	NA	1.097	0.5778
3	rs10934853	128319530	1	ADD	479	1.176	0.1876	0.8144	1.699	0.8655	0.3868
3	rs10934853	128319530	1	DOMDEV	479	0.8386	0.2401	0.5238	1.343	-0.7327	0.4637
3	rs10934853	128319530	1	C3	479	0.5977	0.1901	0.4118	0.8676	-2.707	0.006793
3	rs10934853	128319530	1	GENO_2DF	479	NA	NA	NA	NA	0.8243	0.6622
3	rs6763931	141383991	1	ADD	537	0.8947	0.1312	0.6918	1.157	-0.8481	0.3964
3	rs6763931	141383991	1	DOMDEV	537	1.331	0.1867	0.9232	1.92	1.532	0.1255
3	rs6763931	141383991	1	C3	537	0.5376	0.183	0.3755	0.7695	-3.391	0.0006959
3	rs6763931	141383991	1	GENO_2DF	537	NA	NA	NA	NA	2.666	0.2637
4	rs629242	56276871	2	ADD	483	1.308	0.2487	0.8036	2.13	1.081	0.2799
4	rs629242	56276871	2	DOMDEV	483	0.7526	0.296	0.4213	1.344	-0.9605	0.3368
4	rs629242	56276871	2	C3	483	0.5696	0.1892	0.3931	0.8253	-2.975	0.002932
4	rs629242	56276871	2	GENO_2DF	483	NA	NA	NA	NA	1.224	0.5423
4	rs12500426	94593458	1	ADD	479	1.001	0.1313	0.7742	1.295	0.009924	0.9921
4	rs12500426	94593458	1	DOMDEV	479	1.445	0.1923	0.9913	2.107	1.914	0.05556
4	rs12500426	94593458	1	C3	479	0.5967	0.191	0.4104	0.8676	-2.704	0.00686
4	rs12500426	94593458	1	GENO_2DF	479	NA	NA	NA	NA	3.707	0.1567
4	rs17021918	94641726	2	ADD	494	1.037	0.153	0.7683	1.4	0.2374	0.8123
4	rs17021918	94641726	2	DOMDEV	494	1.279	0.2081	0.8509	1.924	1.184	0.2365
4	rs17021918	94641726	2	C3	494	0.5471	0.1876	0.3788	0.7903	-3.214	0.001307
4	rs17021918	94641726	2	GENO_2DF	494	NA	NA	NA	NA	2.058	0.3573
4	rs7679673	105140377	1	ADD	474	1.057	0.1719	0.7548	1.481	0.3237	0.7462
4	rs7679673	105140377	1	DOMDEV	474	0.8064	0.2184	0.5256	1.237	-0.9854	0.3244
4	rs7679673	105140377	1	C3	474	0.5882	0.1916	0.404	0.8562	-2.77	0.005602
4	rs7679673	105140377	1	GENO_2DF	474	NA	NA	NA	NA	1	0.6064
5	rs2242652	1279913	2	ADD	539	0.8787	0.2412	0.5476	1.41	-0.5363	0.5918
5	rs2242652	1279913	2	DOMDEV	539	1.787	0.3003	0.9919	3.218	1.933	0.05324
5	rs2242652	1279913	2	C3	539	0.5601	0.1834	0.391	0.8024	-3.16	0.001576
5	rs2242652	1279913	2	GENO_2DF	539	NA	NA	NA	NA	5.26	0.07207
5	rs3877899	42801166	1	ADD	516	0.8717	0.2077	0.5802	1.31	-0.661	0.5086
5	rs3877899	42801166	1	DOMDEV	516	1.223	0.2678	0.7237	2.068	0.7525	0.4518
5	rs3877899	42801166	1	C3	516	0.5228	0.1971	0.3552	0.7693	-3.291	0.0009986
5	rs3877899	42801166	1	GENO_2DF	516	NA	NA	NA	NA	0.6245	0.7318
5	rs2121875	44365443	3	ADD	519	0.9147	0.134	0.7034	1.189	-0.6653	0.5058
5	rs2121875	44365443	3	DOMDEV	519	1.084	0.1967	0.737	1.593	0.408	0.6833
5	rs2121875	44365443	3	C3	519	0.5499	0.1852	0.3825	0.7905	-3.23	0.001239
5	rs2121875	44365443	3	GENO_2DF	519	NA	NA	NA	NA	0.4919	0.782
5	rs3733890	79126136	1	ADD	494	1.093	0.1822	0.7647	1.562	0.4879	0.6256
5	rs3733890	79126136	1	DOMDEV	494	0.8265	0.2301	0.5265	1.298	-0.8278	0.4078
5	rs3733890	79126136	1	C3	494	0.5671	0.1885	0.3919	0.8205	-3.009	0.002619
5	rs3733890	79126136	1	GENO_2DF	494	NA	NA	NA	NA	0.6856	0.7098
6	rs130067	31150734	4	ADD	520	0.6264	0.2122	0.4133	0.9495	-2.204	0.0275
6	rs130067	31150734	4	DOMDEV	520	1.257	0.2662	0.7463	2.119	0.8606	0.3895
6	rs130067	31150734	4	C3	520	0.5481	0.186	0.3806	0.7892	-3.232	0.001228
6	rs130067	31150734	4	GENO_2DF	520	NA	NA	NA	NA	5.561	0.06202
6	rs4880	159692840	2	ADD	518	1.042	0.1397	0.7925	1.37	0.295	0.768
6	rs4880	159692840	2	DOMDEV	518	0.885	0.1967	0.6019	1.301	-0.6208	0.5347
6	rs4880	159692840	2	C3	518	0.5213	0.1968	0.3545	0.7667	-3.31	0.0009342
6	rs4880	159692840	2	GENO_2DF	518	NA	NA	NA	NA	0.4607	0.7943
7	rs12155172	20954872	1	ADD	476	0.8854	0.2345	0.5592	1.402	-0.5189	0.6038
7	rs12155172	20954872	1	DOMDEV	476	1.285	0.2861	0.7333	2.251	0.8756	0.3813
7	rs12155172	20954872	1	C3	476	0.6075	0.191	0.4178	0.8834	-2.609	0.009078
7	rs12155172	20954872	1	GENO_2DF	476	NA	NA	NA	NA	0.7876	0.6745
7	rs10486567	27936944	1	ADD	544	0.824	0.2243	0.5309	1.279	-0.8634	0.3879
7	rs10486567	27936944	1	DOMDEV	544	0.9043	0.2701	0.5327	1.535	-0.3724	0.7096
7	rs10486567	27936944	1	C3	544	0.5426	0.1838	0.3785	0.778	-3.326	0.000882
7	rs10486567	27936944	1	GENO_2DF	544	NA	NA	NA	NA	2.713	0.2576
7	rs6465657	98187015	4	ADD	480	0.9171	0.1382	0.6995	1.203	-0.6257	0.5315
7	rs6465657	98187015	4	DOMDEV	480	0.847	0.1916	0.5818	1.233	-0.8664	0.3863
7	rs6465657	98187015	4	C3	480	0.5925	0.1909	0.4076	0.8613	-2.742	0.006107
7	rs6465657	98187015	4	GENO_2DF	480	NA	NA	NA	NA	1.249	0.5356
7	rs10244329	128248636	2	ADD	321	1.622	0.2093	1.076	2.444	2.31	0.02088
7	rs10244329	128248636	2	DOMDEV	321	0.7945	0.2842	0.4552	1.387	-0.8093	0.4183
7	rs10244329	128248636	2	C3	321	0.7723	0.2794	0.4467	1.335	-0.9247	0.3551
7	rs10244329	128248636	2	GENO_2DF	321	NA	NA	NA	NA	5.423	0.06643
7	rs3735035	131195959	2	ADD	472	1.002	0.1381	0.7642	1.313	0.01266	0.9899
7	rs3735035	131195959	2	DOMDEV	472	1.093	0.1922	0.7501	1.594	0.4644	0.6424
7	rs3735035	131195959	2	C3	472	0.597	0.192	0.4098	0.8697	-2.687	0.007205
7	rs3735035	131195959	2	GENO_2DF	472	NA	NA	NA	NA	0.2184	0.8966
8	rs2928679	23438975	2	ADD	488	1.179	0.1374	0.9004	1.543	1.196	0.2315
8	rs2928679	23438975	2	DOMDEV	488	0.8705	0.1897	0.6001	1.263	-0.7312	0.4646
8	rs2928679	23438975	2	C3	488	0.5475	0.1886	0.3784	0.7923	-3.195	0.001401
8	rs2928679	23438975	2	GENO_2DF	488	NA	NA	NA	NA	1.801	0.4063
8	rs1512268	23668950	1	ADD	478	0.9135	0.1439	0.689	1.211	-0.6284	0.5298
8	rs1512268	23668950	1	DOMDEV	478	0.9543	0.1974	0.6481	1.405	-0.2371	0.8126
8	rs1512268	23668950	1	C3	478	0.5864	0.1904	0.4038	0.8517	-2.803	0.005065
8	rs1512268	23668950	1	GENO_2DF	478	NA	NA	NA	NA	0.5702	0.7519
8	rs1016343	127081052	2	ADD	457	0.8876	0.2049	0.594	1.326	-0.5816	0.5608
8	rs1016343	127081052	2	DOMDEV	457	1.508	0.269	0.89	2.555	1.527	0.1268
8	rs1016343	127081052	2	C3	457	0.5909	0.1957	0.4026	0.8672	-2.688	0.007188
8	rs1016343	127081052	2	GENO_2DF	457	NA	NA	NA	NA	2.559	0.2781
8	rs13254738	127092098	4	ADD	483	0.994	0.1665	0.7172	1.378	-0.03605	0.9712
8	rs13254738	127092098	4	DOMDEV	483	1.059	0.219	0.6893	1.626	0.2606	0.7944
8	rs13254738	127092098	4	C3	483	0.5943	0.1892	0.4102	0.8612	-2.75	0.005962
8	rs13254738	127092098	4	GENO_2DF	483	NA	NA	NA	NA	0.07932	0.9611
8	rs6983561	127094635	4	ADD	486	1.639e-05	12190	0	inf	-0.000904	0.9993
8	rs6983561	127094635	4	DOMDEV	486	31890	12190	0	inf	0.0008508	0.9993
8	rs6983561	127094635	4	C3	486	0.5483	0.1903	0.3776	0.7961	-3.159	0.001586
8	rs6983561	127094635	4	GENO_2DF	486	NA	NA	NA	NA	4.31	0.1159
8	rs1378897	127110414	1	ADD	485	NA	NA	NA	NA	NA	NA
8	rs1378897	127110414	1	DOMDEV	485	NA	NA	NA	NA	NA	NA
8	rs1378897	127110414	1	C3	485	NA	NA	NA	NA	NA	NA
8	rs1378897	127110414	1	GENO_2DF	485	NA	NA	NA	NA	NA	NA
8	rs16902094	127308101	3	ADD	486	1.229	0.3527	0.6158	2.454	0.5853	0.5584
8	rs16902094	127308101	3	DOMDEV	486	0.8256	0.4003	0.3767	1.809	-0.4787	0.6322
8	rs16902094	127308101	3	C3	486	0.5441	0.1889	0.3757	0.7879	-3.221	0.001275
8	rs16902094	127308101	3	GENO_2DF	486	NA	NA	NA	NA	0.343	0.8424
8	rs6983267	127401060	2	ADD	493	1.23	0.1372	0.9398	1.609	1.507	0.1317
8	rs6983267	127401060	2	DOMDEV	493	1.233	0.1902	0.8493	1.79	1.101	0.2707
8	rs6983267	127401060	2	C3	493	0.5604	0.1882	0.3876	0.8104	-3.078	0.002087
8	rs6983267	127401060	2	GENO_2DF	493	NA	NA	NA	NA	4.059	0.1314
8	rs7000448	127428925	2	ADD	477	1.08	0.1513	0.803	1.453	0.5097	0.6102
8	rs7000448	127428925	2	DOMDEV	477	1.071	0.2061	0.715	1.604	0.3324	0.7396
8	rs7000448	127428925	2	C3	477	0.5949	0.1915	0.4087	0.8659	-2.712	0.006685
8	rs7000448	127428925	2	GENO_2DF	477	NA	NA	NA	NA	0.5765	0.7496
8	rs6470517	127448159	3	ADD	456	1.222	0.4248	0.5317	2.81	0.4726	0.6365
8	rs6470517	127448159	3	DOMDEV	456	0.6698	0.464	0.2698	1.663	-0.8635	0.3879
8	rs6470517	127448159	3	C3	456	0.6284	0.196	0.4279	0.9227	-2.37	0.01776
8	rs6470517	127448159	3	GENO_2DF	456	NA	NA	NA	NA	1.114	0.5729
8	rs6470494	128087904	2	ADD	483	1.07	0.1652	0.774	1.479	0.4092	0.6824
8	rs6470494	128087904	2	DOMDEV	483	0.8392	0.2209	0.5443	1.294	-0.7939	0.4272
8	rs6470494	128087904	2	C3	483	0.5703	0.1892	0.3936	0.8264	-2.968	0.003002
8	rs6470494	128087904	2	GENO_2DF	483	NA	NA	NA	NA	0.6307	0.7295
8	rs2294008	142680513	2	ADD	479	1.076	0.1398	0.818	1.415	0.5225	0.6013
8	rs2294008	142680513	2	DOMDEV	479	1.121	0.1953	0.7647	1.644	0.586	0.5579
8	rs2294008	142680513	2	C3	479	0.5596	0.1906	0.3852	0.813	-3.047	0.002314
8	rs2294008	142680513	2	GENO_2DF	479	NA	NA	NA	NA	0.7901	0.6736
9	rs11536889	117715853	4	ADD	486	1.178	0.2778	0.6832	2.03	0.5887	0.5561
9	rs11536889	117715853	4	DOMDEV	486	0.7025	0.3329	0.3658	1.349	-1.06	0.289
9	rs11536889	117715853	4	C3	486	0.5705	0.1894	0.3936	0.8269	-2.964	0.00304
9	rs11536889	117715853	4	GENO_2DF	486	NA	NA	NA	NA	1.248	0.5359
10	rs12529	5136651	3	ADD	538	0.7663	0.1281	0.5961	0.9851	-2.077	0.0378
10	rs12529	5136651	3	DOMDEV	538	1.235	0.1911	0.8495	1.797	1.106	0.2686
10	rs12529	5136651	3	C3	538	0.532	0.1832	0.3715	0.7618	-3.446	0.0005696
10	rs12529	5136651	3	GENO_2DF	538	NA	NA	NA	NA	4.705	0.09512
10	rs10740051	46025670	1	ADD	479	1.121	0.1952	0.765	1.644	0.5872	0.557
10	rs10740051	46025670	1	DOMDEV	479	0.8085	0.2449	0.5003	1.307	-0.8681	0.3853
10	rs10740051	46025670	1	C3	479	0.6106	0.1924	0.4188	0.8902	-2.564	0.01033
10	rs10740051	46025670	1	GENO_2DF	479	NA	NA	NA	NA	0.7594	0.6841
10	rs7920517	46063201	3	ADD	473	0.7044	0.1365	0.5391	0.9204	-2.567	0.01025
10	rs7920517	46063201	3	DOMDEV	473	1.064	0.1928	0.7294	1.553	0.3235	0.7463
10	rs7920517	46063201	3	C3	473	0.5905	0.1929	0.4046	0.8619	-2.73	0.006325
10	rs7920517	46063201	3	GENO_2DF	473	NA	NA	NA	NA	6.623	0.03645
10	rs6162	102837224	1	ADD	538	1.057	0.1393	0.8042	1.388	0.3958	0.6923
10	rs6162	102837224	1	DOMDEV	538	0.9169	0.1932	0.6279	1.339	-0.4491	0.6534
10	rs6162	102837224	1	C3	538	0.5394	0.1821	0.3775	0.7707	-3.391	0.0006966
10	rs6162	102837224	1	GENO_2DF	538	NA	NA	NA	NA	0.271	0.8733
10	rs4962416	125008303	4	ADD	551	1.018	0.2016	0.6854	1.511	0.08633	0.9312
10	rs4962416	125008303	4	DOMDEV	551	0.7919	0.2451	0.4898	1.28	-0.9519	0.3411
10	rs4962416	125008303	4	C3	551	0.5375	0.1818	0.3764	0.7675	-3.416	0.0006361
10	rs4962416	125008303	4	GENO_2DF	551	NA	NA	NA	NA	1.433	0.4884
11	rs7127900	2212344	1	ADD	485	0.9333	0.1854	0.6489	1.342	-0.3726	0.7094
11	rs7127900	2212344	1	DOMDEV	485	1.045	0.2456	0.646	1.692	0.1806	0.8567
11	rs7127900	2212344	1	C3	485	0.5358	0.1891	0.3698	0.7762	-3.3	0.0009678
11	rs7127900	2212344	1	GENO_2DF	485	NA	NA	NA	NA	0.141	0.9319
11	rs1001179	34438684	2	ADD	512	0.7079	0.2367	0.4451	1.126	-1.459	0.1446
11	rs1001179	34438684	2	DOMDEV	512	1.42	0.2873	0.8088	2.494	1.221	0.222
11	rs1001179	34438684	2	C3	512	0.5155	0.1973	0.3501	0.7589	-3.358	0.0007857
11	rs1001179	34438684	2	GENO_2DF	512	NA	NA	NA	NA	2.205	0.332
11	rs594519	56305228	2	ADD	481	1.067	0.2163	0.6985	1.63	0.3005	0.7638
11	rs594519	56305228	2	DOMDEV	481	0.7823	0.2745	0.4568	1.34	-0.8942	0.3712
11	rs594519	56305228	2	C3	481	0.5712	0.1896	0.3939	0.8282	-2.954	0.003135
11	rs594519	56305228	2	GENO_2DF	481	NA	NA	NA	NA	0.9598	0.6188
11	rs2727270	61603237	2	ADD	490	0.4328	0.5847	0.1376	1.361	-1.432	0.1521
11	rs2727270	61603237	2	DOMDEV	490	1.645	0.6205	0.4876	5.551	0.8023	0.4224
11	rs2727270	61603237	2	C3	490	0.5474	0.1893	0.3777	0.7934	-3.183	0.001459
11	rs2727270	61603237	2	GENO_2DF	490	NA	NA	NA	NA	4.001	0.1353
11	rs174448	61872101	4	ADD	539	0.9868	0.1466	0.7404	1.315	-0.09065	0.9278
11	rs174448	61872101	4	DOMDEV	539	0.8001	0.1972	0.5436	1.178	-1.131	0.258
11	rs174448	61872101	4	C3	539	0.5544	0.1827	0.3875	0.7931	-3.228	0.001245
11	rs174448	61872101	4	GENO_2DF	539	NA	NA	NA	NA	1.589	0.4517
11	rs10896438	69139102	3	ADD	540	0.6382	0.141	0.4841	0.8414	-3.185	0.001449
11	rs10896438	69139102	3	DOMDEV	540	1.158	0.199	0.7842	1.711	0.7387	0.4601
11	rs10896438	69139102	3	C3	540	0.519	0.1847	0.3614	0.7454	-3.551	0.0003844
11	rs10896438	69139102	3	GENO_2DF	540	NA	NA	NA	NA	10.31	0.005764
11	rs11228565	69211113	1	ADD	492	0.5241	0.2595	0.3151	0.8715	-2.49	0.01279
11	rs11228565	69211113	1	DOMDEV	492	1.527	0.3027	0.8439	2.765	1.399	0.1617
11	rs11228565	69211113	1	C3	492	0.565	0.1887	0.3903	0.8178	-3.026	0.002482
11	rs11228565	69211113	1	GENO_2DF	492	NA	NA	NA	NA	6.797	0.03343
11	rs7931342	69227030	2	ADD	486	1.612	0.1398	1.226	2.121	3.415	0.0006367
11	rs7931342	69227030	2	DOMDEV	486	1.08	0.1923	0.7407	1.574	0.3993	0.6897
11	rs7931342	69227030	2	C3	486	0.5402	0.1914	0.3712	0.7862	-3.217	0.001296
11	rs7931342	69227030	2	GENO_2DF	486	NA	NA	NA	NA	12.22	0.002221
12	rs3782905	47872384	3	ADD	449	0.9752	0.1634	0.7079	1.343	-0.1534	0.8781
12	rs3782905	47872384	3	DOMDEV	449	1.661	0.2282	1.062	2.598	2.225	0.02611
12	rs3782905	47872384	3	C3	449	0.5731	0.2012	0.3863	0.8502	-2.766	0.005667
12	rs3782905	47872384	3	GENO_2DF	449	NA	NA	NA	NA	5.779	0.05561
12	rs7299460	48296268	2	ADD	452	1.14	0.1728	0.8127	1.6	0.7596	0.4475
12	rs7299460	48296268	2	DOMDEV	452	0.8764	0.229	0.5595	1.373	-0.576	0.5646
12	rs7299460	48296268	2	C3	452	0.525	0.1986	0.3558	0.7748	-3.245	0.001175
12	rs7299460	48296268	2	GENO_2DF	452	NA	NA	NA	NA	0.633	0.7287
12	rs6823	48362412	3	ADD	478	1.2	0.1369	0.9174	1.569	1.33	0.1834
12	rs6823	48362412	3	DOMDEV	478	0.9691	0.1922	0.665	1.412	-0.1632	0.8703
12	rs6823	48362412	3	C3	478	0.5986	0.1906	0.412	0.8697	-2.692	0.007098
12	rs6823	48362412	3	GENO_2DF	478	NA	NA	NA	NA	1.77	0.4126
12	rs2071358	48366449	1	ADD	480	1.36	0.3407	0.6973	2.651	0.9017	0.3672
12	rs2071358	48366449	1	DOMDEV	480	0.4743	0.3903	0.2207	1.019	-1.911	0.05598
12	rs2071358	48366449	1	C3	480	0.5625	0.1909	0.3869	0.8177	-3.014	0.002575
12	rs2071358	48366449	1	GENO_2DF	480	NA	NA	NA	NA	5.095	0.07826
12	rs10875943	49282227	4	ADD	513	1.072	0.1758	0.7596	1.513	0.3961	0.692
12	rs10875943	49282227	4	DOMDEV	513	0.72	0.2255	0.4628	1.12	-1.457	0.145
12	rs10875943	49282227	4	C3	513	0.537	0.186	0.373	0.7732	-3.343	0.0008283
12	rs10875943	49282227	4	GENO_2DF	513	NA	NA	NA	NA	2.37	0.3058
12	rs902774	52880120	1	ADD	494	0.6367	0.3895	0.2968	1.366	-1.159	0.2465
12	rs902774	52880120	1	DOMDEV	494	1.495	0.4321	0.6411	3.487	0.9311	0.3518
12	rs902774	52880120	1	C3	494	0.5503	0.188	0.3806	0.7955	-3.177	0.001488
12	rs902774	52880120	1	GENO_2DF	494	NA	NA	NA	NA	1.365	0.5053
12	rs2279744	68808800	3	ADD	464	0.988	0.1481	0.7391	1.321	-0.0812	0.9353
12	rs2279744	68808800	3	DOMDEV	464	1.133	0.212	0.7477	1.716	0.5886	0.5561
12	rs2279744	68808800	3	C3	464	0.5591	0.1939	0.3823	0.8176	-2.999	0.002711
12	rs2279744	68808800	3	GENO_2DF	464	NA	NA	NA	NA	0.3676	0.8321
12	rs2946834	102394036	2	ADD	535	1.151	0.1692	0.8262	1.604	0.8313	0.4058
12	rs2946834	102394036	2	DOMDEV	535	0.8686	0.2194	0.565	1.335	-0.6423	0.5207
12	rs2946834	102394036	2	C3	535	0.5395	0.1832	0.3768	0.7725	-3.369	0.0007538
12	rs2946834	102394036	2	GENO_2DF	535	NA	NA	NA	NA	0.7447	0.6891
12	rs7965399	102497908	4	ADD	515	NA	NA	NA	NA	NA	NA
12	rs7965399	102497908	4	DOMDEV	515	NA	NA	NA	NA	NA	NA
12	rs7965399	102497908	4	C3	515	NA	NA	NA	NA	NA	NA
12	rs7965399	102497908	4	GENO_2DF	515	NA	NA	NA	NA	NA	NA
15	rs28665122	101277522	1	ADD	497	1.237	0.4027	0.5619	2.724	0.5286	0.5971
15	rs28665122	101277522	1	DOMDEV	497	1.235	0.4673	0.4942	3.086	0.4514	0.6517
15	rs28665122	101277522	1	C3	497	0.512	0.2009	0.3454	0.759	-3.333	0.0008588
15	rs28665122	101277522	1	GENO_2DF	497	NA	NA	NA	NA	2.831	0.2428
15	rs4965373	101812395	1	ADD	517	1.003	0.1651	0.7255	1.386	0.01655	0.9868
15	rs4965373	101812395	1	DOMDEV	517	1.075	0.225	0.6914	1.67	0.3202	0.7488
15	rs4965373	101812395	1	C3	517	0.524	0.1979	0.3555	0.7722	-3.266	0.00109
15	rs4965373	101812395	1	GENO_2DF	517	NA	NA	NA	NA	0.137	0.9338
16	rs1529916	8897333	2	ADD	475	1.189	0.1665	0.8578	1.648	1.039	0.2987
16	rs1529916	8897333	2	DOMDEV	475	0.8793	0.2231	0.5679	1.362	-0.5764	0.5643
16	rs1529916	8897333	2	C3	475	0.6244	0.1912	0.4292	0.9083	-2.463	0.01379
16	rs1529916	8897333	2	GENO_2DF	475	NA	NA	NA	NA	1.085	0.5813
16	rs9939609	53786615	1	ADD	484	0.8577	0.1506	0.6385	1.152	-1.02	0.3079
16	rs9939609	53786615	1	DOMDEV	484	0.6847	0.2014	0.4614	1.016	-1.881	0.05997
16	rs9939609	53786615	1	C3	484	0.5579	0.1921	0.3828	0.8129	-3.038	0.002382
16	rs9939609	53786615	1	GENO_2DF	484	NA	NA	NA	NA	6.555	0.03772
17	rs11545302	12899963	3	ADD	388	1.09	0.1928	0.7469	1.59	0.4466	0.6551
17	rs11545302	12899963	3	DOMDEV	388	0.8049	0.2468	0.4962	1.306	-0.8796	0.3791
17	rs11545302	12899963	3	C3	388	0.4873	0.2089	0.3236	0.734	-3.44	0.0005813
17	rs11545302	12899963	3	GENO_2DF	388	NA	NA	NA	NA	0.7744	0.6789
17	rs17552022	12994978	4	ADD	525	1.163	0.5814	0.3721	3.634	0.2595	0.7952
17	rs17552022	12994978	4	DOMDEV	525	1.024	0.6143	0.3073	3.414	0.0389	0.969
17	rs17552022	12994978	4	C3	525	0.5439	0.184	0.3793	0.7801	-3.31	0.0009345
17	rs17552022	12994978	4	GENO_2DF	525	NA	NA	NA	NA	0.6698	0.7154
17	rs4054823	13721707	4	ADD	485	0.8343	0.1348	0.6406	1.087	-1.343	0.1791
17	rs4054823	13721707	4	DOMDEV	485	1.287	0.1919	0.8835	1.875	1.314	0.1887
17	rs4054823	13721707	4	C3	485	0.5647	0.1895	0.3895	0.8187	-3.016	0.002561
17	rs4054823	13721707	4	GENO_2DF	485	NA	NA	NA	NA	3.034	0.2194
17	rs3094509	37702294	2	ADD	534	1.008	0.1501	0.7513	1.353	0.05448	0.9566
17	rs3094509	37702294	2	DOMDEV	534	1.129	0.2027	0.759	1.68	0.5991	0.5491
17	rs3094509	37702294	2	C3	534	0.5521	0.1831	0.3856	0.7905	-3.244	0.001179
17	rs3094509	37702294	2	GENO_2DF	534	NA	NA	NA	NA	0.4731	0.7893
17	rs4794758	37720433	2	ADD	525	0.8595	0.1788	0.6054	1.22	-0.8466	0.3972
17	rs4794758	37720433	2	DOMDEV	525	1.307	0.2348	0.8251	2.071	1.141	0.2537
17	rs4794758	37720433	2	C3	525	0.5392	0.1838	0.3761	0.773	-3.36	0.0007782
17	rs4794758	37720433	2	GENO_2DF	525	NA	NA	NA	NA	1.353	0.5085
17	rs1016990	37728924	3	ADD	538	1.166	0.1518	0.8661	1.571	1.013	0.311
17	rs1016990	37728924	3	DOMDEV	538	1.037	0.2041	0.6951	1.547	0.1782	0.8586
17	rs1016990	37728924	3	C3	538	0.5536	0.1826	0.387	0.7918	-3.239	0.0012
17	rs1016990	37728924	3	GENO_2DF	538	NA	NA	NA	NA	1.51	0.47
17	rs799923	41251931	1	ADD	539	0.65	0.2157	0.4259	0.992	-1.997	0.04582
17	rs799923	41251931	1	DOMDEV	539	1.243	0.2663	0.7374	2.094	0.8163	0.4144
17	rs799923	41251931	1	C3	539	0.5152	0.1825	0.3603	0.7368	-3.634	0.0002795
17	rs799923	41251931	1	GENO_2DF	539	NA	NA	NA	NA	4.596	0.1005
17	rs983085	69212061	3	ADD	487	0.9052	0.1327	0.6978	1.174	-0.7505	0.453
17	rs983085	69212061	3	DOMDEV	487	1.076	0.1892	0.7429	1.56	0.3891	0.6972
17	rs983085	69212061	3	C3	487	0.5641	0.1889	0.3896	0.8168	-3.032	0.002433
17	rs983085	69212061	3	GENO_2DF	487	NA	NA	NA	NA	0.6804	0.7116
17	rs1859962	71112612	3	ADD	484	0.93	0.139	0.7083	1.221	-0.522	0.6017
17	rs1859962	71112612	3	DOMDEV	484	0.9363	0.1912	0.6437	1.362	-0.3442	0.7307
17	rs1859962	71112612	3	C3	484	0.5932	0.1898	0.4089	0.8604	-2.753	0.005914
17	rs1859962	71112612	3	GENO_2DF	484	NA	NA	NA	NA	0.4374	0.8036
17	rs8066956	80034443	2	ADD	478	0.9549	0.2511	0.5837	1.562	-0.184	0.854
17	rs8066956	80034443	2	DOMDEV	478	1.239	0.3027	0.6847	2.243	0.7086	0.4786
17	rs8066956	80034443	2	C3	478	0.5962	0.1913	0.4098	0.8674	-2.703	0.006864
17	rs8066956	80034443	2	GENO_2DF	478	NA	NA	NA	NA	0.7556	0.6854
17	rs6502051	80059332	1	ADD	480	1.178	0.1393	0.8965	1.548	1.176	0.2398
17	rs6502051	80059332	1	DOMDEV	480	1.096	0.1945	0.749	1.605	0.4737	0.6357
17	rs6502051	80059332	1	C3	480	0.5604	0.1899	0.3862	0.8131	-3.049	0.002295
17	rs6502051	80059332	1	GENO_2DF	480	NA	NA	NA	NA	1.935	0.38
17	rs1127678	82101611	1	ADD	321	1.125	0.3946	0.5189	2.437	0.2974	0.7662
17	rs1127678	82101611	1	DOMDEV	321	0.5456	0.4508	0.2255	1.32	-1.344	0.179
17	rs1127678	82101611	1	C3	321	0.8164	0.2847	0.4673	1.426	-0.7125	0.4761
17	rs1127678	82101611	1	GENO_2DF	321	NA	NA	NA	NA	3.162	0.2057
19	rs713041	1106616	2	ADD	518	0.899	0.1401	0.6831	1.183	-0.7596	0.4475
19	rs713041	1106616	2	DOMDEV	518	0.8871	0.1977	0.6021	1.307	-0.6059	0.5446
19	rs713041	1106616	2	C3	518	0.5168	0.1969	0.3513	0.7603	-3.351	0.0008038
19	rs713041	1106616	2	GENO_2DF	518	NA	NA	NA	NA	1.058	0.5892
19	rs8102476	38244973	2	ADD	483	1.141	0.1358	0.8741	1.488	0.9689	0.3326
19	rs8102476	38244973	2	DOMDEV	483	0.828	0.1915	0.5689	1.205	-0.9862	0.3241
19	rs8102476	38244973	2	C3	483	0.5681	0.1892	0.392	0.8231	-2.989	0.002803
19	rs8102476	38244973	2	GENO_2DF	483	NA	NA	NA	NA	1.654	0.4373
19	rs887391	41479716	4	ADD	479	1.702	0.2371	1.069	2.708	2.242	0.02494
19	rs887391	41479716	4	DOMDEV	479	0.812	0.2933	0.4569	1.443	-0.71	0.4777
19	rs887391	41479716	4	C3	479	0.5802	0.191	0.399	0.8436	-2.85	0.004369
19	rs887391	41479716	4	GENO_2DF	479	NA	NA	NA	NA	6.567	0.03749
19	rs2659056	50832687	3	ADD	484	1.333	0.1909	0.9169	1.937	1.505	0.1323
19	rs2659056	50832687	3	DOMDEV	484	0.9136	0.2415	0.5691	1.467	-0.3743	0.7082
19	rs2659056	50832687	3	C3	484	0.5817	0.1894	0.4013	0.8432	-2.86	0.004234
19	rs2659056	50832687	3	GENO_2DF	484	NA	NA	NA	NA	2.715	0.2573
19	rs17632542	50858501	4	ADD	545	0.8542	0.7102	0.2123	3.437	-0.2219	0.8244
19	rs17632542	50858501	4	DOMDEV	545	0.5263	0.7618	0.1182	2.343	-0.8426	0.3995
19	rs17632542	50858501	4	C3	545	0.5093	0.1832	0.3557	0.7293	-3.683	0.0002305
19	rs17632542	50858501	4	GENO_2DF	545	NA	NA	NA	NA	7.698	0.0213
19	rs1354774	50889862	4	ADD	541	0.8423	0.139	0.6414	1.106	-1.235	0.2168
19	rs1354774	50889862	4	DOMDEV	541	1.163	0.196	0.7923	1.709	0.7723	0.4399
19	rs1354774	50889862	4	C3	541	0.5501	0.1817	0.3853	0.7856	-3.288	0.001009
19	rs1354774	50889862	4	GENO_2DF	541	NA	NA	NA	NA	1.654	0.4373
19	rs2659122	51363026	3	ADD	485	0.66	0.2059	0.4409	0.9882	-2.018	0.04364
19	rs2659122	51363026	3	DOMDEV	485	1.225	0.2541	0.7447	2.016	0.7997	0.4239
19	rs2659122	51363026	3	C3	485	0.5732	0.1895	0.3954	0.8309	-2.938	0.003309
19	rs2659122	51363026	3	GENO_2DF	485	NA	NA	NA	NA	4.527	0.104
19	rs1506684	51371419	2	ADD	481	1.003	0.1318	0.7745	1.298	0.02171	0.9827
19	rs1506684	51371419	2	DOMDEV	481	1.062	0.1932	0.7272	1.551	0.3116	0.7553
19	rs1506684	51371419	2	C3	481	0.579	0.1892	0.3996	0.839	-2.888	0.003878
19	rs1506684	51371419	2	GENO_2DF	481	NA	NA	NA	NA	0.1032	0.9497
20	rs3918256	44640959	3	ADD	525	0.8166	0.1327	0.6296	1.059	-1.527	0.1269
20	rs3918256	44640959	3	DOMDEV	525	1.218	0.1896	0.8402	1.767	1.042	0.2976
20	rs3918256	44640959	3	C3	525	0.5462	0.1844	0.3806	0.784	-3.28	0.00104
20	rs3918256	44640959	3	GENO_2DF	525	NA	NA	NA	NA	2.844	0.2412
20	rs3787268	46013092	1	ADD	402	0.7416	0.2654	0.4409	1.248	-1.126	0.2601
20	rs3787268	46013092	1	DOMDEV	402	1.537	0.3481	0.7769	3.041	1.235	0.2169
20	rs3787268	46013092	1	C3	402	0.6706	0.2402	0.4188	1.074	-1.663	0.09623
20	rs3787268	46013092	1	GENO_2DF	402	NA	NA	NA	NA	1.711	0.425
20	rs3787557	52783135	4	ADD	484	0.6774	0.7107	0.1682	2.728	-0.5479	0.5837
20	rs3787557	52783135	4	DOMDEV	484	1.314	0.7357	0.3108	5.559	0.3717	0.7101
20	rs3787557	52783135	4	C3	484	0.557	0.1894	0.3843	0.8073	-3.091	0.001997
20	rs3787557	52783135	4	GENO_2DF	484	NA	NA	NA	NA	0.5607	0.7555
20	rs2762939	54164712	4	ADD	499	0.9533	0.1987	0.6458	1.407	-0.2405	0.8099
20	rs2762939	54164712	4	DOMDEV	499	1.083	0.2483	0.6656	1.761	0.3203	0.7488
20	rs2762939	54164712	4	C3	499	0.5418	0.1862	0.3761	0.7805	-3.291	0.001
20	rs2762939	54164712	4	GENO_2DF	499	NA	NA	NA	NA	0.1047	0.949
20	rs2296241	54169680	3	ADD	489	0.9724	0.1323	0.7503	1.26	-0.2113	0.8327
20	rs2296241	54169680	3	DOMDEV	489	1.088	0.1892	0.7507	1.576	0.4438	0.6572
20	rs2296241	54169680	3	C3	489	0.5486	0.1888	0.379	0.7943	-3.18	0.001472
20	rs2296241	54169680	3	GENO_2DF	489	NA	NA	NA	NA	0.23	0.8914
22	rs5759167	43104206	2	ADD	328	1.023	0.1787	0.7209	1.453	0.1292	0.8972
22	rs5759167	43104206	2	DOMDEV	328	1.769	0.2822	1.018	3.076	2.022	0.04318
22	rs5759167	43104206	2	C3	328	0.7812	0.2764	0.4545	1.343	-0.8934	0.3716
22	rs5759167	43104206	2	GENO_2DF	328	NA	NA	NA	NA	4.199	0.1225
23	rs5945619	51498820	4	ADD	483	NA	NA	NA	NA	NA	NA
23	rs5945619	51498820	4	DOMDEV	483	NA	NA	NA	NA	NA	NA
23	rs5945619	51498820	4	C3	483	NA	NA	NA	NA	NA	NA
23	rs5945619	51498820	4	GENO_2DF	483	NA	NA	NA	NA	NA	NA
23	rs5919432	67801708	4	ADD	513	NA	NA	NA	NA	NA	NA
23	rs5919432	67801708	4	DOMDEV	513	NA	NA	NA	NA	NA	NA
23	rs5919432	67801708	4	C3	513	NA	NA	NA	NA	NA	NA
23	rs5919432	67801708	4	GENO_2DF	513	NA	NA	NA	NA	NA	NA

## Sheet: Smoke_Agg_vs_Control_Adjusted
CHR	SNP	UNADJ	GC	BONF	HOLM	SIDAK_SS	SIDAK_SD	FDR_BH	FDR_BY
11	rs7931342	0.0006367	0.0006367	0.06303	0.06303	0.0611	0.0611	0.06303	0.3263
11	rs10896438	0.001449	0.001449	0.1434	0.142	0.1337	0.1325	0.07172	0.3713
10	rs7920517	0.01025	0.01025	1	0.994	0.6393	0.6318	0.3164	1
11	rs11228565	0.01279	0.01279	1	1	0.7203	0.7092	0.3164	1
7	rs10244329	0.02088	0.02088	1	1	0.8762	0.8653	0.3889	1
19	rs887391	0.02494	0.02494	1	1	0.9179	0.9069	0.3889	1
6	rs130067	0.0275	0.0275	1	1	0.9367	0.9252	0.3889	1
10	rs12529	0.0378	0.0378	1	1	0.9779	0.9711	0.4536	1
19	rs2659122	0.04364	0.04364	1	1	0.9879	0.9828	0.4536	1
17	rs799923	0.04582	0.04582	1	1	0.9904	0.9853	0.4536	1
2	rs632148	0.05063	0.05063	1	1	0.9942	0.9902	0.4556	1
1	rs5845	0.07232	0.07232	1	1	0.9994	0.9986	0.5967	1
20	rs3918256	0.1269	0.1269	1	1	1	1	0.8191	1
8	rs6983267	0.1317	0.1317	1	1	1	1	0.8191	1
19	rs2659056	0.1323	0.1323	1	1	1	1	0.8191	1
3	rs1799977	0.1324	0.1324	1	1	1	1	0.8191	1
11	rs1001179	0.1446	0.1446	1	1	1	1	0.8364	1
11	rs2727270	0.1521	0.1521	1	1	1	1	0.8364	1
3	rs4135275	0.1706	0.1706	1	1	1	1	0.8645	1
17	rs4054823	0.1791	0.1791	1	1	1	1	0.8645	1
12	rs6823	0.1834	0.1834	1	1	1	1	0.8645	1
19	rs1354774	0.2168	0.2168	1	1	1	1	0.9329	1
2	rs721048	0.2226	0.2226	1	1	1	1	0.9329	1
8	rs2928679	0.2315	0.2315	1	1	1	1	0.9329	1
17	rs6502051	0.2398	0.2398	1	1	1	1	0.9329	1
12	rs902774	0.2465	0.2465	1	1	1	1	0.9329	1
20	rs3787268	0.2601	0.2601	1	1	1	1	0.9329	1
2	rs10187424	0.264	0.264	1	1	1	1	0.9329	1
4	rs629242	0.2799	0.2799	1	1	1	1	0.9329	1
16	rs1529916	0.2987	0.2987	1	1	1	1	0.9329	1
3	rs1050450	0.2995	0.2995	1	1	1	1	0.9329	1
16	rs9939609	0.3079	0.3079	1	1	1	1	0.9329	1
17	rs1016990	0.311	0.311	1	1	1	1	0.9329	1
19	rs8102476	0.3326	0.3326	1	1	1	1	0.9684	1
12	rs2071358	0.3672	0.3672	1	1	1	1	0.9798	1
1	rs1380576	0.3866	0.3866	1	1	1	1	0.9798	1
3	rs10934853	0.3868	0.3868	1	1	1	1	0.9798	1
7	rs10486567	0.3879	0.3879	1	1	1	1	0.9798	1
3	rs6763931	0.3964	0.3964	1	1	1	1	0.9798	1
17	rs4794758	0.3972	0.3972	1	1	1	1	0.9798	1
12	rs2946834	0.4058	0.4058	1	1	1	1	0.9798	1
12	rs7299460	0.4475	0.4475	1	1	1	1	1	1
19	rs713041	0.4475	0.4475	1	1	1	1	1	1
17	rs983085	0.453	0.453	1	1	1	1	1	1
5	rs2121875	0.5058	0.5058	1	1	1	1	1	1
5	rs3877899	0.5086	0.5086	1	1	1	1	1	1
8	rs1512268	0.5298	0.5298	1	1	1	1	1	1
7	rs6465657	0.5315	0.5315	1	1	1	1	1	1
9	rs11536889	0.5561	0.5561	1	1	1	1	1	1
10	rs10740051	0.557	0.557	1	1	1	1	1	1
8	rs16902094	0.5584	0.5584	1	1	1	1	1	1
8	rs1016343	0.5608	0.5608	1	1	1	1	1	1
20	rs3787557	0.5837	0.5837	1	1	1	1	1	1
5	rs2242652	0.5918	0.5918	1	1	1	1	1	1
15	rs28665122	0.5971	0.5971	1	1	1	1	1	1
8	rs2294008	0.6013	0.6013	1	1	1	1	1	1
17	rs1859962	0.6017	0.6017	1	1	1	1	1	1
7	rs12155172	0.6038	0.6038	1	1	1	1	1	1
8	rs7000448	0.6102	0.6102	1	1	1	1	1	1
5	rs3733890	0.6256	0.6256	1	1	1	1	1	1
8	rs6470517	0.6365	0.6365	1	1	1	1	1	1
17	rs11545302	0.6551	0.6551	1	1	1	1	1	1
8	rs6470494	0.6824	0.6824	1	1	1	1	1	1
12	rs10875943	0.692	0.692	1	1	1	1	1	1
10	rs6162	0.6923	0.6923	1	1	1	1	1	1
11	rs7127900	0.7094	0.7094	1	1	1	1	1	1
4	rs7679673	0.7462	0.7462	1	1	1	1	1	1
2	rs1056827	0.7575	0.7575	1	1	1	1	1	1
11	rs594519	0.7638	0.7638	1	1	1	1	1	1
17	rs1127678	0.7662	0.7662	1	1	1	1	1	1
6	rs4880	0.768	0.768	1	1	1	1	1	1
17	rs17552022	0.7952	0.7952	1	1	1	1	1	1
20	rs2762939	0.8099	0.8099	1	1	1	1	1	1
4	rs17021918	0.8123	0.8123	1	1	1	1	1	1
19	rs17632542	0.8244	0.8244	1	1	1	1	1	1
2	rs2292884	0.8255	0.8255	1	1	1	1	1	1
20	rs2296241	0.8327	0.8327	1	1	1	1	1	1
17	rs8066956	0.854	0.854	1	1	1	1	1	1
12	rs3782905	0.8781	0.8781	1	1	1	1	1	1
22	rs5759167	0.8972	0.8972	1	1	1	1	1	1
1	rs12042763	0.9182	0.9182	1	1	1	1	1	1
2	rs1465618	0.9212	0.9212	1	1	1	1	1	1
11	rs174448	0.9278	0.9278	1	1	1	1	1	1
10	rs4962416	0.9312	0.9312	1	1	1	1	1	1
12	rs2279744	0.9353	0.9353	1	1	1	1	1	1
17	rs3094509	0.9566	0.9566	1	1	1	1	1	1
8	rs13254738	0.9712	0.9712	1	1	1	1	1	1
2	rs2710647	0.9792	0.9792	1	1	1	1	1	1
19	rs1506684	0.9827	0.9827	1	1	1	1	1	1
15	rs4965373	0.9868	0.9868	1	1	1	1	1	1
7	rs3735035	0.9899	0.9899	1	1	1	1	1	1
4	rs12500426	0.9921	0.9921	1	1	1	1	1	1
2	rs12621278	0.9993	0.9993	1	1	1	1	1	1
8	rs6983561	0.9993	0.9993	1	1	1	1	1	1
3	rs17793693	0.9993	0.9993	1	1	1	1	1	1
12	rs7965399	1	1	1	1	1	1	1	1
8	rs1378897	1	1	1	1	1	1	1	1
23	rs5945619	1	1	1	1	1	1	1	1
23	rs5919432	1	1	1	1	1	1	1	1

## Sheet: Smoke_Agg_vs_NAgg_OR
CHR	SNP	BP	A1	TEST	NMISS	OR	SE	L95	U95	STAT	P
1	rs5845	86863156	2	ADD	194	1.061	0.3544	0.5295	2.125	0.1661	0.868
1	rs5845	86863156	2	DOMDEV	194	0.9507	0.4514	0.3925	2.303	-0.1121	0.9108
1	rs5845	86863156	2	C3	194	1.322	0.3456	0.6714	2.602	0.8074	0.4194
1	rs5845	86863156	2	GENO_2DF	194	NA	NA	NA	NA	0.02768	0.9863
1	rs12042763	186682744	2	ADD	233	0.873	0.4017	0.3973	1.918	-0.3381	0.7353
1	rs12042763	186682744	2	DOMDEV	233	1.501	0.4717	0.5957	3.784	0.8616	0.3889
1	rs12042763	186682744	2	C3	233	1.14	0.3206	0.608	2.136	0.4076	0.6836
1	rs12042763	186682744	2	GENO_2DF	233	NA	NA	NA	NA	0.9277	0.6288
1	rs1380576	204519150	4	ADD	86	1.192	0.361	0.5874	2.418	0.4861	0.6269
1	rs1380576	204519150	4	DOMDEV	86	0.742	0.5484	0.2533	2.174	-0.5442	0.5863
1	rs1380576	204519150	4	C3	86	1.705	0.5129	0.6239	4.659	1.04	0.2983
1	rs1380576	204519150	4	GENO_2DF	86	NA	NA	NA	NA	0.4131	0.8134
2	rs632148	31580962	4	ADD	196	2.097	0.3	1.164	3.775	2.467	0.01361
2	rs632148	31580962	4	DOMDEV	196	0.7684	0.3866	0.3601	1.639	-0.6814	0.4956
2	rs632148	31580962	4	C3	196	1.253	0.3493	0.632	2.485	0.6462	0.5181
2	rs632148	31580962	4	GENO_2DF	196	NA	NA	NA	NA	6.373	0.04131
2	rs1056827	38075034	2	ADD	30	4.801e-05	12190	0	inf	-0.0008158	0.9993
2	rs1056827	38075034	2	DOMDEV	30	21590	12190	0	inf	0.0008188	0.9993
2	rs1056827	38075034	2	C3	30	1.84	0.8553	0.3441	9.835	0.7128	0.476
2	rs1056827	38075034	2	GENO_2DF	30	NA	NA	NA	NA	0.001721	0.9991
2	rs1465618	43326810	1	ADD	243	1.05	0.4145	0.4662	2.367	0.1187	0.9056
2	rs1465618	43326810	1	DOMDEV	243	1.401	0.4813	0.5456	3.599	0.7011	0.4832
2	rs1465618	43326810	1	C3	243	1.266	0.313	0.6857	2.339	0.7546	0.4505
2	rs1465618	43326810	1	GENO_2DF	243	NA	NA	NA	NA	1.477	0.4779
2	rs721048	62904596	1	ADD	250	4.647e-05	3853	0	inf	-0.002589	0.9979
2	rs721048	62904596	1	DOMDEV	250	25450	3853	0	inf	0.002633	0.9979
2	rs721048	62904596	1	C3	250	1.16	0.3092	0.6329	2.127	0.4808	0.6307
2	rs721048	62904596	1	GENO_2DF	250	NA	NA	NA	NA	0.2791	0.8698
2	rs2710647	63213970	2	ADD	241	1.128	0.2208	0.7315	1.738	0.5441	0.5864
2	rs2710647	63213970	2	DOMDEV	241	0.923	0.3079	0.5048	1.687	-0.2604	0.7945
2	rs2710647	63213970	2	C3	241	1.178	0.3103	0.6414	2.165	0.529	0.5968
2	rs2710647	63213970	2	GENO_2DF	241	NA	NA	NA	NA	0.3339	0.8462
2	rs10187424	85567174	4	ADD	242	1.027	0.2174	0.6708	1.573	0.123	0.9021
2	rs10187424	85567174	4	DOMDEV	242	0.5952	0.3241	0.3154	1.123	-1.601	0.1093
2	rs10187424	85567174	4	C3	242	1.229	0.3162	0.6614	2.284	0.6524	0.5141
2	rs10187424	85567174	4	GENO_2DF	242	NA	NA	NA	NA	2.642	0.2668
2	rs12621278	172446825	3	ADD	85	3.759e-05	12190	0	inf	-0.0008359	0.9993
2	rs12621278	172446825	3	DOMDEV	85	15820	12190	0	inf	0.0007932	0.9994
2	rs12621278	172446825	3	C3	85	1.356	0.4994	0.5097	3.609	0.6103	0.5417
2	rs12621278	172446825	3	GENO_2DF	85	NA	NA	NA	NA	0.3959	0.8204
2	rs2292884	238443226	3	ADD	245	4.054e-05	3256	0	inf	-0.003106	0.9975
2	rs2292884	238443226	3	DOMDEV	245	16450	3256	0	inf	0.002982	0.9976
2	rs2292884	238443226	3	C3	245	1.173	0.3124	0.636	2.164	0.5113	0.6091
2	rs2292884	238443226	3	GENO_2DF	245	NA	NA	NA	NA	1.656	0.437
3	rs17793693	12345971	1	ADD	190	75010	12190	0	inf	0.0009209	0.9993
3	rs17793693	12345971	1	DOMDEV	190	1.421e-05	12190	0	inf	-0.0009157	0.9993
3	rs17793693	12345971	1	C3	190	0.8928	0.3477	0.4516	1.765	-0.3262	0.7443
3	rs17793693	12345971	1	GENO_2DF	190	NA	NA	NA	NA	0.005687	0.9972
3	rs4135275	12443844	3	ADD	235	1.216	0.4305	0.5231	2.828	0.4548	0.6493
3	rs4135275	12443844	3	DOMDEV	235	0.9466	0.5054	0.3515	2.549	-0.1086	0.9135
3	rs4135275	12443844	3	C3	235	1.117	0.3154	0.6018	2.072	0.3498	0.7265
3	rs4135275	12443844	3	GENO_2DF	235	NA	NA	NA	NA	0.3413	0.8431
3	rs1799977	37012077	3	ADD	246	1.108	0.2466	0.6833	1.797	0.4156	0.6777
3	rs1799977	37012077	3	DOMDEV	246	0.6004	0.365	0.2936	1.228	-1.398	0.1621
3	rs1799977	37012077	3	C3	246	1.249	0.3085	0.6822	2.287	0.7207	0.4711
3	rs1799977	37012077	3	GENO_2DF	246	NA	NA	NA	NA	2.012	0.3657
3	rs1050450	49357401	2	ADD	195	1.276	0.2629	0.7623	2.137	0.928	0.3534
3	rs1050450	49357401	2	DOMDEV	195	0.7533	0.3721	0.3633	1.562	-0.7614	0.4464
3	rs1050450	49357401	2	C3	195	1.312	0.3473	0.6642	2.592	0.7819	0.4343
3	rs1050450	49357401	2	GENO_2DF	195	NA	NA	NA	NA	1.057	0.5895
3	rs10934853	128319530	1	ADD	235	1.108	0.2847	0.634	1.935	0.3588	0.7198
3	rs10934853	128319530	1	DOMDEV	235	0.5025	0.4074	0.2261	1.117	-1.689	0.09124
3	rs10934853	128319530	1	C3	235	1.09	0.3184	0.584	2.034	0.2708	0.7866
3	rs10934853	128319530	1	GENO_2DF	235	NA	NA	NA	NA	3.232	0.1986
3	rs6763931	141383991	1	ADD	246	1.137	0.2265	0.7295	1.773	0.5675	0.5703
3	rs6763931	141383991	1	DOMDEV	246	1.477	0.308	0.8075	2.701	1.266	0.2056
3	rs6763931	141383991	1	C3	246	1.226	0.3112	0.666	2.256	0.6539	0.5132
3	rs6763931	141383991	1	GENO_2DF	246	NA	NA	NA	NA	2.091	0.3515
4	rs629242	56276871	2	ADD	242	1.245	0.3666	0.6068	2.554	0.5975	0.5502
4	rs629242	56276871	2	DOMDEV	242	0.562	0.4653	0.2258	1.399	-1.238	0.2155
4	rs629242	56276871	2	C3	242	1.217	0.3105	0.6624	2.237	0.6332	0.5266
4	rs629242	56276871	2	GENO_2DF	242	NA	NA	NA	NA	1.652	0.4378
4	rs12500426	94593458	1	ADD	233	1.221	0.2239	0.7874	1.894	0.8926	0.3721
4	rs12500426	94593458	1	DOMDEV	233	1.436	0.3165	0.7722	2.67	1.143	0.2531
4	rs12500426	94593458	1	C3	233	1.12	0.3187	0.5996	2.092	0.3551	0.7225
4	rs12500426	94593458	1	GENO_2DF	233	NA	NA	NA	NA	2.105	0.349
4	rs17021918	94641726	2	ADD	244	0.8102	0.2693	0.4779	1.373	-0.7818	0.4343
4	rs17021918	94641726	2	DOMDEV	244	0.9879	0.3645	0.4835	2.018	-0.03328	0.9735
4	rs17021918	94641726	2	C3	244	1.245	0.3122	0.6751	2.295	0.7016	0.4829
4	rs17021918	94641726	2	GENO_2DF	244	NA	NA	NA	NA	0.8557	0.6519
4	rs7679673	105140377	1	ADD	231	1.173	0.2601	0.7047	1.954	0.6148	0.5387
4	rs7679673	105140377	1	DOMDEV	231	0.6293	0.3504	0.3166	1.251	-1.322	0.1862
4	rs7679673	105140377	1	C3	231	1.208	0.3218	0.6427	2.269	0.586	0.5579
4	rs7679673	105140377	1	GENO_2DF	231	NA	NA	NA	NA	1.75	0.4168
5	rs2242652	1279913	2	ADD	246	0.6399	0.5379	0.2229	1.836	-0.83	0.4065
5	rs2242652	1279913	2	DOMDEV	246	1.374	0.6288	0.4008	4.714	0.5058	0.613
5	rs2242652	1279913	2	C3	246	1.197	0.3089	0.6531	2.192	0.5809	0.5613
5	rs2242652	1279913	2	GENO_2DF	246	NA	NA	NA	NA	0.7695	0.6806
5	rs3877899	42801166	1	ADD	195	1.158	0.3173	0.6216	2.156	0.4612	0.6446
5	rs3877899	42801166	1	DOMDEV	195	0.9872	0.4299	0.4251	2.293	-0.02993	0.9761
5	rs3877899	42801166	1	C3	195	1.264	0.3459	0.6416	2.49	0.677	0.4984
5	rs3877899	42801166	1	GENO_2DF	195	NA	NA	NA	NA	0.2881	0.8658
5	rs2121875	44365443	3	ADD	242	0.8381	0.2399	0.5237	1.341	-0.736	0.4617
5	rs2121875	44365443	3	DOMDEV	242	1.362	0.3304	0.7129	2.603	0.9356	0.3495
5	rs2121875	44365443	3	C3	242	1.193	0.3099	0.6498	2.19	0.5691	0.5693
5	rs2121875	44365443	3	GENO_2DF	242	NA	NA	NA	NA	1.052	0.5909
5	rs3733890	79126136	1	ADD	243	0.7423	0.4022	0.3375	1.633	-0.7411	0.4587
5	rs3733890	79126136	1	DOMDEV	243	1.344	0.46	0.5455	3.311	0.6426	0.5205
5	rs3733890	79126136	1	C3	243	1.199	0.3177	0.6434	2.235	0.5716	0.5676
5	rs3733890	79126136	1	GENO_2DF	243	NA	NA	NA	NA	0.5681	0.7527
6	rs130067	31150734	4	ADD	243	0.6343	0.3896	0.2956	1.361	-1.169	0.2426
6	rs130067	31150734	4	DOMDEV	243	0.9773	0.4889	0.3749	2.548	-0.04703	0.9625
6	rs130067	31150734	4	C3	243	1.257	0.3137	0.6797	2.324	0.7291	0.4659
6	rs130067	31150734	4	GENO_2DF	243	NA	NA	NA	NA	2.877	0.2373
6	rs4880	159692840	2	ADD	196	0.9529	0.2336	0.6029	1.506	-0.2064	0.8365
6	rs4880	159692840	2	DOMDEV	196	0.851	0.3366	0.4399	1.646	-0.4792	0.6318
6	rs4880	159692840	2	C3	196	1.313	0.3426	0.6707	2.569	0.7942	0.4271
6	rs4880	159692840	2	GENO_2DF	196	NA	NA	NA	NA	0.2884	0.8657
7	rs12155172	20954872	1	ADD	232	1.175	0.3185	0.6296	2.194	0.5074	0.6119
7	rs12155172	20954872	1	DOMDEV	232	0.5963	0.4407	0.2514	1.414	-1.173	0.2407
7	rs12155172	20954872	1	C3	232	1.117	0.3204	0.5961	2.093	0.3457	0.7296
7	rs12155172	20954872	1	GENO_2DF	232	NA	NA	NA	NA	1.424	0.4906
7	rs10486567	27936944	1	ADD	238	0.8688	0.4051	0.3927	1.922	-0.3472	0.7284
7	rs10486567	27936944	1	DOMDEV	238	1.172	0.4728	0.4638	2.959	0.3348	0.7378
7	rs10486567	27936944	1	C3	238	1.348	0.3161	0.7257	2.505	0.9455	0.3444
7	rs10486567	27936944	1	GENO_2DF	238	NA	NA	NA	NA	0.1337	0.9353
7	rs6465657	98187015	4	ADD	235	1.053	0.2289	0.6725	1.65	0.2266	0.8207
7	rs6465657	98187015	4	DOMDEV	235	0.9888	0.3139	0.5345	1.829	-0.03577	0.9715
7	rs6465657	98187015	4	C3	235	1.15	0.3168	0.618	2.139	0.4407	0.6594
7	rs6465657	98187015	4	GENO_2DF	235	NA	NA	NA	NA	0.05219	0.9742
7	rs10244329	128248636	2	ADD	92	2.417	0.399	1.106	5.283	2.212	0.02697
7	rs10244329	128248636	2	DOMDEV	92	1.274	0.5088	0.4701	3.455	0.4764	0.6338
7	rs10244329	128248636	2	C3	92	1.588	0.4985	0.5978	4.219	0.9279	0.3535
7	rs10244329	128248636	2	GENO_2DF	92	NA	NA	NA	NA	4.912	0.08577
7	rs3735035	131195959	2	ADD	232	1.625	0.2306	1.034	2.553	2.105	0.03528
7	rs3735035	131195959	2	DOMDEV	232	0.9922	0.3264	0.5233	1.881	-0.02391	0.9809
7	rs3735035	131195959	2	C3	232	1.134	0.3237	0.6015	2.139	0.3894	0.697
7	rs3735035	131195959	2	GENO_2DF	232	NA	NA	NA	NA	4.587	0.1009
8	rs2928679	23438975	2	ADD	241	0.8445	0.2405	0.5271	1.353	-0.7027	0.4823
8	rs2928679	23438975	2	DOMDEV	241	1.029	0.3221	0.5473	1.934	0.08846	0.9295
8	rs2928679	23438975	2	C3	241	1.138	0.3156	0.6131	2.112	0.4094	0.6822
8	rs2928679	23438975	2	GENO_2DF	241	NA	NA	NA	NA	0.5012	0.7783
8	rs1512268	23668950	1	ADD	235	0.9309	0.2415	0.5799	1.494	-0.2967	0.7667
8	rs1512268	23668950	1	DOMDEV	235	1.086	0.3232	0.5765	2.046	0.2557	0.7982
8	rs1512268	23668950	1	C3	235	1.176	0.3149	0.6344	2.18	0.5148	0.6067
8	rs1512268	23668950	1	GENO_2DF	235	NA	NA	NA	NA	0.1208	0.9414
8	rs1016343	127081052	2	ADD	225	4.455e-05	3517	0	inf	-0.002849	0.9977
8	rs1016343	127081052	2	DOMDEV	225	25530	3517	0	inf	0.002885	0.9977
8	rs1016343	127081052	2	C3	225	1.152	0.3209	0.6141	2.161	0.4408	0.6593
8	rs1016343	127081052	2	GENO_2DF	225	NA	NA	NA	NA	0.1452	0.93
8	rs13254738	127092098	4	ADD	235	0.8898	0.2998	0.4944	1.601	-0.3893	0.697
8	rs13254738	127092098	4	DOMDEV	235	1.199	0.3795	0.5701	2.523	0.479	0.6319
8	rs13254738	127092098	4	C3	235	1.093	0.3167	0.5874	2.033	0.2802	0.7793
8	rs13254738	127092098	4	GENO_2DF	235	NA	NA	NA	NA	0.2517	0.8818
8	rs6983561	127094635	4	ADD	242	4.669e-05	12190	0	inf	-0.0008181	0.9993
8	rs6983561	127094635	4	DOMDEV	242	13770	12190	0	inf	0.0007819	0.9994
8	rs6983561	127094635	4	C3	242	1.217	0.3104	0.6625	2.237	0.6335	0.5264
8	rs6983561	127094635	4	GENO_2DF	242	NA	NA	NA	NA	0.7245	0.6961
8	rs1378897	127110414	1	ADD	242	NA	NA	NA	NA	NA	NA
8	rs1378897	127110414	1	DOMDEV	242	NA	NA	NA	NA	NA	NA
8	rs1378897	127110414	1	C3	242	NA	NA	NA	NA	NA	NA
8	rs1378897	127110414	1	GENO_2DF	242	NA	NA	NA	NA	NA	NA
8	rs16902094	127308101	3	ADD	240	1.224	0.5881	0.3866	3.876	0.3439	0.7309
8	rs16902094	127308101	3	DOMDEV	240	1.593	0.6447	0.4502	5.636	0.7221	0.4703
8	rs16902094	127308101	3	C3	240	1.167	0.3178	0.6259	2.175	0.4853	0.6275
8	rs16902094	127308101	3	GENO_2DF	240	NA	NA	NA	NA	4.148	0.1257
8	rs6983267	127401060	2	ADD	244	1.329	0.2021	0.8945	1.975	1.408	0.159
8	rs6983267	127401060	2	DOMDEV	244	0.6444	0.3156	0.3471	1.196	-1.392	0.1638
8	rs6983267	127401060	2	C3	244	1.181	0.3155	0.6364	2.192	0.5279	0.5976
8	rs6983267	127401060	2	GENO_2DF	244	NA	NA	NA	NA	3.717	0.1559
8	rs7000448	127428925	2	ADD	234	0.9309	0.2444	0.5766	1.503	-0.293	0.7695
8	rs7000448	127428925	2	DOMDEV	234	0.7753	0.3488	0.3914	1.536	-0.7297	0.4656
8	rs7000448	127428925	2	C3	234	1.109	0.3175	0.5953	2.066	0.3261	0.7444
8	rs7000448	127428925	2	GENO_2DF	234	NA	NA	NA	NA	0.9212	0.6309
8	rs6470517	127448159	3	ADD	215	1.252	0.625	0.3678	4.262	0.3596	0.7192
8	rs6470517	127448159	3	DOMDEV	215	0.4788	0.721	0.1165	1.967	-1.021	0.307
8	rs6470517	127448159	3	C3	215	1.096	0.3381	0.5648	2.125	0.2703	0.787
8	rs6470517	127448159	3	GENO_2DF	215	NA	NA	NA	NA	1.765	0.4136
8	rs6470494	128087904	2	ADD	239	0.6131	0.3893	0.2859	1.315	-1.257	0.2089
8	rs6470494	128087904	2	DOMDEV	239	1.519	0.4557	0.622	3.711	0.918	0.3586
8	rs6470494	128087904	2	C3	239	1.11	0.3152	0.5983	2.059	0.3304	0.7411
8	rs6470494	128087904	2	GENO_2DF	239	NA	NA	NA	NA	1.579	0.454
8	rs2294008	142680513	2	ADD	235	1.435	0.2322	0.9105	2.262	1.556	0.1197
8	rs2294008	142680513	2	DOMDEV	235	1.296	0.3168	0.6966	2.412	0.8187	0.413
8	rs2294008	142680513	2	C3	235	1.291	0.3202	0.6894	2.419	0.7986	0.4245
8	rs2294008	142680513	2	GENO_2DF	235	NA	NA	NA	NA	3.219	0.2
9	rs11536889	117715853	4	ADD	241	4.161e-05	5448	0	inf	-0.001851	0.9985
9	rs11536889	117715853	4	DOMDEV	241	11400	5448	0	inf	0.001715	0.9986
9	rs11536889	117715853	4	C3	241	1.178	0.3126	0.6385	2.174	0.5248	0.5997
9	rs11536889	117715853	4	GENO_2DF	241	NA	NA	NA	NA	3.487	0.1749
10	rs12529	5136651	3	ADD	250	1.087	0.2187	0.708	1.669	0.3814	0.7029
10	rs12529	5136651	3	DOMDEV	250	1.55	0.3075	0.8487	2.833	1.426	0.1537
10	rs12529	5136651	3	C3	250	1.193	0.3087	0.6515	2.185	0.5722	0.5672
10	rs12529	5136651	3	GENO_2DF	250	NA	NA	NA	NA	2.386	0.3034
10	rs10740051	46025670	1	ADD	234	1.476	0.2787	0.8548	2.549	1.397	0.1624
10	rs10740051	46025670	1	DOMDEV	234	0.8103	0.3734	0.3898	1.685	-0.5633	0.5732
10	rs10740051	46025670	1	C3	234	1.248	0.3247	0.6604	2.358	0.682	0.4953
10	rs10740051	46025670	1	GENO_2DF	234	NA	NA	NA	NA	1.971	0.3732
10	rs7920517	46063201	1	ADD	232	1.087	0.2084	0.7226	1.635	0.4008	0.6886
10	rs7920517	46063201	1	DOMDEV	232	0.7277	0.317	0.391	1.355	-1.003	0.316
10	rs7920517	46063201	1	C3	232	1.166	0.3164	0.6271	2.168	0.4852	0.6275
10	rs7920517	46063201	1	GENO_2DF	232	NA	NA	NA	NA	1.173	0.5563
10	rs6162	102837224	1	ADD	249	1.113	0.2404	0.695	1.784	0.4467	0.6551
10	rs6162	102837224	1	DOMDEV	249	1.277	0.3188	0.6839	2.386	0.7681	0.4424
10	rs6162	102837224	1	C3	249	1.18	0.3078	0.6456	2.157	0.5382	0.5904
10	rs6162	102837224	1	GENO_2DF	249	NA	NA	NA	NA	1.102	0.5765
10	rs4962416	125008303	4	ADD	245	1.547	0.2587	0.9316	2.568	1.686	0.09179
10	rs4962416	125008303	4	DOMDEV	245	0.3401	0.3824	0.1607	0.7195	-2.821	0.004793
10	rs4962416	125008303	4	C3	245	1.298	0.3178	0.6962	2.42	0.8205	0.4119
10	rs4962416	125008303	4	GENO_2DF	245	NA	NA	NA	NA	8.134	0.01713
11	rs7127900	2212344	1	ADD	241	0.6882	0.3947	0.3176	1.492	-0.9467	0.3438
11	rs7127900	2212344	1	DOMDEV	241	1.317	0.4746	0.5197	3.339	0.5809	0.5613
11	rs7127900	2212344	1	C3	241	1.099	0.3178	0.5893	2.049	0.2964	0.7669
11	rs7127900	2212344	1	GENO_2DF	241	NA	NA	NA	NA	0.9187	0.6317
11	rs1001179	34438684	2	ADD	196	0.5731	0.5418	0.1982	1.657	-1.028	0.3041
11	rs1001179	34438684	2	DOMDEV	196	2.166	0.6035	0.6637	7.07	1.281	0.2002
11	rs1001179	34438684	2	C3	196	1.411	0.3458	0.7166	2.78	0.9966	0.319
11	rs1001179	34438684	2	GENO_2DF	196	NA	NA	NA	NA	1.643	0.4398
11	rs594519	56305228	2	ADD	242	0.5989	0.5364	0.2093	1.714	-0.9559	0.3391
11	rs594519	56305228	2	DOMDEV	242	1.855	0.5971	0.5757	5.979	1.035	0.3006
11	rs594519	56305228	2	C3	242	1.244	0.3115	0.6757	2.291	0.7013	0.4831
11	rs594519	56305228	2	GENO_2DF	242	NA	NA	NA	NA	1.096	0.5782
11	rs2727270	61603237	2	ADD	242	4.342e-05	7031	0	inf	-0.001429	0.9989
11	rs2727270	61603237	2	DOMDEV	242	12170	7031	0	inf	0.001338	0.9989
11	rs2727270	61603237	2	C3	242	1.248	0.3123	0.6765	2.301	0.7086	0.4786
11	rs2727270	61603237	2	GENO_2DF	242	NA	NA	NA	NA	2.284	0.3191
11	rs174448	61872101	4	ADD	247	0.838	0.2758	0.488	1.439	-0.641	0.5216
11	rs174448	61872101	4	DOMDEV	247	1.264	0.3499	0.6369	2.51	0.6705	0.5026
11	rs174448	61872101	4	C3	247	1.297	0.3132	0.7022	2.397	0.8314	0.4058
11	rs174448	61872101	4	GENO_2DF	247	NA	NA	NA	NA	0.5851	0.7464
11	rs10896438	69139102	3	ADD	248	0.5891	0.2883	0.3348	1.037	-1.835	0.06644
11	rs10896438	69139102	3	DOMDEV	248	1.772	0.3622	0.8715	3.604	1.58	0.1141
11	rs10896438	69139102	3	C3	248	1.185	0.3096	0.646	2.174	0.5487	0.5832
11	rs10896438	69139102	3	GENO_2DF	248	NA	NA	NA	NA	3.86	0.1451
11	rs11228565	69211113	1	ADD	244	0.6955	0.394	0.3213	1.505	-0.9217	0.3567
11	rs11228565	69211113	1	DOMDEV	244	0.9304	0.4816	0.362	2.391	-0.1497	0.881
11	rs11228565	69211113	1	C3	244	1.24	0.3131	0.6711	2.29	0.6862	0.4926
11	rs11228565	69211113	1	GENO_2DF	244	NA	NA	NA	NA	2.236	0.3269
11	rs7931342	69227030	2	ADD	240	1.309	0.2448	0.8101	2.115	1.1	0.2714
11	rs7931342	69227030	2	DOMDEV	240	1.486	0.3178	0.7973	2.771	1.247	0.2123
11	rs7931342	69227030	2	C3	240	1.112	0.3171	0.5972	2.069	0.3338	0.7385
11	rs7931342	69227030	2	GENO_2DF	240	NA	NA	NA	NA	2.984	0.225
12	rs3782905	47872384	3	ADD	208	1.137	0.2509	0.6954	1.86	0.5124	0.6084
12	rs3782905	47872384	3	DOMDEV	208	1.127	0.3614	0.5548	2.287	0.3296	0.7417
12	rs3782905	47872384	3	C3	208	1.383	0.3341	0.7184	2.662	0.97	0.332
12	rs3782905	47872384	3	GENO_2DF	208	NA	NA	NA	NA	0.5785	0.7488
12	rs7299460	48296268	2	ADD	216	0.8162	0.302	0.4516	1.475	-0.6726	0.5012
12	rs7299460	48296268	2	DOMDEV	216	0.7512	0.401	0.3423	1.649	-0.7133	0.4757
12	rs7299460	48296268	2	C3	216	1.354	0.3277	0.7123	2.574	0.9249	0.355
12	rs7299460	48296268	2	GENO_2DF	216	NA	NA	NA	NA	2.177	0.3368
12	rs6823	48362412	3	ADD	233	0.9433	0.2329	0.5975	1.489	-0.2508	0.802
12	rs6823	48362412	3	DOMDEV	233	1.036	0.323	0.5501	1.951	0.1097	0.9126
12	rs6823	48362412	3	C3	233	1.117	0.3174	0.5994	2.08	0.3475	0.7282
12	rs6823	48362412	3	GENO_2DF	233	NA	NA	NA	NA	0.06624	0.9674
12	rs2071358	48366449	1	ADD	240	1.596	0.4699	0.6355	4.009	0.9952	0.3197
12	rs2071358	48366449	1	DOMDEV	240	0.744	0.5466	0.2549	2.172	-0.5411	0.5884
12	rs2071358	48366449	1	C3	240	1.23	0.3137	0.6653	2.276	0.661	0.5086
12	rs2071358	48366449	1	GENO_2DF	240	NA	NA	NA	NA	1.162	0.5594
12	rs10875943	49282227	4	ADD	243	0.9006	0.3036	0.4967	1.633	-0.3448	0.7303
12	rs10875943	49282227	4	DOMDEV	243	0.7894	0.3889	0.3684	1.692	-0.608	0.5432
12	rs10875943	49282227	4	C3	243	1.279	0.3133	0.6923	2.364	0.7863	0.4317
12	rs10875943	49282227	4	GENO_2DF	243	NA	NA	NA	NA	1.126	0.5694
12	rs902774	52880120	1	ADD	245	0.9187	0.5667	0.3025	2.79	-0.1496	0.8811
12	rs902774	52880120	1	DOMDEV	245	1.044	0.6427	0.2964	3.68	0.06752	0.9462
12	rs902774	52880120	1	C3	245	1.24	0.3116	0.673	2.283	0.6892	0.4907
12	rs902774	52880120	1	GENO_2DF	245	NA	NA	NA	NA	0.03357	0.9834
12	rs2279744	68808800	3	ADD	228	0.9516	0.2589	0.5729	1.581	-0.1917	0.848
12	rs2279744	68808800	3	DOMDEV	228	1.561	0.3495	0.787	3.098	1.275	0.2024
12	rs2279744	68808800	3	C3	228	1.253	0.3217	0.6668	2.353	0.7003	0.4837
12	rs2279744	68808800	3	GENO_2DF	228	NA	NA	NA	NA	1.761	0.4145
12	rs2946834	102394036	2	ADD	244	1.076	0.2816	0.6198	1.869	0.2616	0.7936
12	rs2946834	102394036	2	DOMDEV	244	0.9706	0.3657	0.474	1.988	-0.08155	0.935
12	rs2946834	102394036	2	C3	244	1.249	0.3124	0.6774	2.305	0.7131	0.4758
12	rs2946834	102394036	2	GENO_2DF	244	NA	NA	NA	NA	0.07304	0.9641
12	rs7965399	102497908	4	ADD	243	NA	NA	NA	NA	NA	NA
12	rs7965399	102497908	4	DOMDEV	243	NA	NA	NA	NA	NA	NA
12	rs7965399	102497908	4	C3	243	NA	NA	NA	NA	NA	NA
12	rs7965399	102497908	4	GENO_2DF	243	NA	NA	NA	NA	NA	NA
15	rs28665122	101277522	1	ADD	191	4.709e-05	8607	0	inf	-0.001158	0.9991
15	rs28665122	101277522	1	DOMDEV	191	38410	8607	0	inf	0.001226	0.999
15	rs28665122	101277522	1	C3	191	1.291	0.3503	0.6497	2.565	0.7289	0.4661
15	rs28665122	101277522	1	GENO_2DF	191	NA	NA	NA	NA	2.12	0.3464
15	rs4965373	101812395	1	ADD	196	0.5751	0.3942	0.2656	1.245	-1.404	0.1604
15	rs4965373	101812395	1	DOMDEV	196	1.119	0.4865	0.4314	2.905	0.2319	0.8166
15	rs4965373	101812395	1	C3	196	1.245	0.349	0.6279	2.467	0.6268	0.5308
15	rs4965373	101812395	1	GENO_2DF	196	NA	NA	NA	NA	2.998	0.2234
16	rs1529916	8897333	2	ADD	231	0.6364	0.3913	0.2956	1.37	-1.155	0.2482
16	rs1529916	8897333	2	DOMDEV	231	1.596	0.4581	0.6504	3.918	1.021	0.3072
16	rs1529916	8897333	2	C3	231	1.161	0.3185	0.6216	2.167	0.4674	0.6402
16	rs1529916	8897333	2	GENO_2DF	231	NA	NA	NA	NA	1.41	0.4942
16	rs9939609	53786615	1	ADD	242	1.333	0.2117	0.8803	2.018	1.358	0.1745
16	rs9939609	53786615	1	DOMDEV	242	0.52	0.3166	0.2796	0.9673	-2.065	0.03892
16	rs9939609	53786615	1	C3	242	1.25	0.3136	0.6759	2.311	0.7109	0.4772
16	rs9939609	53786615	1	GENO_2DF	242	NA	NA	NA	NA	5.3	0.07066
17	rs11545302	12899963	3	ADD	235	0.894	0.304	0.4927	1.622	-0.3687	0.7123
17	rs11545302	12899963	3	DOMDEV	235	0.683	0.3948	0.315	1.481	-0.9656	0.3343
17	rs11545302	12899963	3	C3	235	1.271	0.3199	0.6789	2.379	0.7491	0.4538
17	rs11545302	12899963	3	GENO_2DF	235	NA	NA	NA	NA	2.214	0.3305
17	rs17552022	12994978	4	ADD	248	4.678e-05	12190	0	inf	-0.0008179	0.9993
17	rs17552022	12994978	4	DOMDEV	248	15340	12190	0	inf	0.0007907	0.9994
17	rs17552022	12994978	4	C3	248	1.186	0.3087	0.6474	2.171	0.5513	0.5814
17	rs17552022	12994978	4	GENO_2DF	248	NA	NA	NA	NA	0.6701	0.7153
17	rs4054823	13721707	4	ADD	242	1.036	0.2102	0.6859	1.564	0.1665	0.8678
17	rs4054823	13721707	4	DOMDEV	242	1.004	0.3092	0.5477	1.84	0.01257	0.99
17	rs4054823	13721707	4	C3	242	1.206	0.3108	0.6558	2.217	0.6024	0.5469
17	rs4054823	13721707	4	GENO_2DF	242	NA	NA	NA	NA	0.02855	0.9858
17	rs3094509	37702294	2	ADD	245	1.055	0.2245	0.6793	1.638	0.2374	0.8124
17	rs3094509	37702294	2	DOMDEV	245	0.589	0.3436	0.3004	1.155	-1.54	0.1235
17	rs3094509	37702294	2	C3	245	1.188	0.3101	0.6467	2.181	0.5543	0.5794
17	rs3094509	37702294	2	GENO_2DF	245	NA	NA	NA	NA	2.478	0.2897
17	rs4794758	37720433	2	ADD	248	0.7508	0.3292	0.3938	1.431	-0.8707	0.3839
17	rs4794758	37720433	2	DOMDEV	248	1.061	0.4235	0.4625	2.433	0.1393	0.8892
17	rs4794758	37720433	2	C3	248	1.22	0.3079	0.6675	2.231	0.6468	0.5178
17	rs4794758	37720433	2	GENO_2DF	248	NA	NA	NA	NA	1.062	0.588
17	rs1016990	37728924	3	ADD	248	1.144	0.2365	0.7197	1.819	0.5693	0.5692
17	rs1016990	37728924	3	DOMDEV	248	0.7113	0.34	0.3653	1.385	-1.002	0.3163
17	rs1016990	37728924	3	C3	248	1.195	0.3086	0.6528	2.189	0.5781	0.5632
17	rs1016990	37728924	3	GENO_2DF	248	NA	NA	NA	NA	1.04	0.5945
17	rs799923	41251931	1	ADD	251	0.692	0.3921	0.3209	1.492	-0.9389	0.3478
17	rs799923	41251931	1	DOMDEV	251	1.214	0.4735	0.4798	3.07	0.409	0.6826
17	rs799923	41251931	1	C3	251	1.171	0.3084	0.6396	2.143	0.5112	0.6092
17	rs799923	41251931	1	GENO_2DF	251	NA	NA	NA	NA	1.045	0.593
17	rs983085	69212061	3	ADD	239	0.7715	0.2218	0.4994	1.192	-1.17	0.2421
17	rs983085	69212061	3	DOMDEV	239	0.9619	0.3164	0.5173	1.788	-0.1228	0.9022
17	rs983085	69212061	3	C3	239	1.134	0.3171	0.6091	2.111	0.3965	0.6917
17	rs983085	69212061	3	GENO_2DF	239	NA	NA	NA	NA	1.476	0.478
17	rs1859962	71112612	3	ADD	238	1.214	0.2196	0.7895	1.867	0.8835	0.377
17	rs1859962	71112612	3	DOMDEV	238	0.79	0.3108	0.4296	1.452	-0.7588	0.448
17	rs1859962	71112612	3	C3	238	1.139	0.3145	0.6147	2.109	0.4125	0.68
17	rs1859962	71112612	3	GENO_2DF	238	NA	NA	NA	NA	1.38	0.5017
17	rs8066956	80034443	2	ADD	233	1.817	0.3188	0.9729	3.395	1.874	0.06096
17	rs8066956	80034443	2	DOMDEV	233	0.8191	0.4123	0.3651	1.838	-0.484	0.6284
17	rs8066956	80034443	2	C3	233	1.287	0.3261	0.6793	2.439	0.7739	0.439
17	rs8066956	80034443	2	GENO_2DF	233	NA	NA	NA	NA	4.18	0.1237
17	rs6502051	80059332	1	ADD	238	0.9235	0.236	0.5815	1.467	-0.3373	0.7359
17	rs6502051	80059332	1	DOMDEV	238	1.007	0.3276	0.5298	1.914	0.02107	0.9832
17	rs6502051	80059332	1	C3	238	1.241	0.3177	0.6656	2.312	0.6786	0.4974
17	rs6502051	80059332	1	GENO_2DF	238	NA	NA	NA	NA	0.1207	0.9414
17	rs1127678	82101611	1	ADD	85	1.307	0.6458	0.3687	4.635	0.415	0.6781
17	rs1127678	82101611	1	DOMDEV	85	1.262	0.7371	0.2975	5.35	0.3153	0.7525
17	rs1127678	82101611	1	C3	85	1.753	0.5083	0.6474	4.748	1.105	0.2693
17	rs1127678	82101611	1	GENO_2DF	85	NA	NA	NA	NA	0.9852	0.611
19	rs713041	1106616	2	ADD	196	0.6121	0.2812	0.3527	1.062	-1.746	0.08082
19	rs713041	1106616	2	DOMDEV	196	1.311	0.3639	0.6424	2.675	0.744	0.4569
19	rs713041	1106616	2	C3	196	1.364	0.3464	0.6918	2.689	0.896	0.3702
19	rs713041	1106616	2	GENO_2DF	196	NA	NA	NA	NA	3.063	0.2162
19	rs8102476	38244973	2	ADD	242	0.9299	0.2314	0.5909	1.463	-0.3143	0.7533
19	rs8102476	38244973	2	DOMDEV	242	1.095	0.3153	0.5904	2.032	0.2885	0.773
19	rs8102476	38244973	2	C3	242	1.21	0.311	0.6579	2.227	0.6141	0.5392
19	rs8102476	38244973	2	GENO_2DF	242	NA	NA	NA	NA	0.1483	0.9285
19	rs887391	41479716	4	ADD	240	1.496	0.3695	0.7251	3.087	1.09	0.2757
19	rs887391	41479716	4	DOMDEV	240	1.497	0.4514	0.6179	3.626	0.8935	0.3716
19	rs887391	41479716	4	C3	240	1.368	0.3232	0.7261	2.578	0.9696	0.3323
19	rs887391	41479716	4	GENO_2DF	240	NA	NA	NA	NA	6.351	0.04177
19	rs2659056	50832687	3	ADD	241	1.011	0.3089	0.552	1.853	0.0362	0.9711
19	rs2659056	50832687	3	DOMDEV	241	0.6616	0.4096	0.2964	1.477	-1.009	0.3132
19	rs2659056	50832687	3	C3	241	1.223	0.3107	0.6651	2.248	0.6476	0.5172
19	rs2659056	50832687	3	GENO_2DF	241	NA	NA	NA	NA	1.524	0.4667
19	rs17632542	50858501	4	ADD	252	4.171e-05	12190	0	inf	-0.0008273	0.9993
19	rs17632542	50858501	4	DOMDEV	252	7612	12190	0	inf	0.0007332	0.9994
19	rs17632542	50858501	4	C3	252	1.216	0.3083	0.6646	2.226	0.6348	0.5256
19	rs17632542	50858501	4	GENO_2DF	252	NA	NA	NA	NA	3.351	0.1872
19	rs1354774	50889862	4	ADD	251	0.7277	0.2671	0.4311	1.228	-1.19	0.234
19	rs1354774	50889862	4	DOMDEV	251	1.507	0.3486	0.7609	2.984	1.176	0.2395
19	rs1354774	50889862	4	C3	251	1.241	0.3096	0.6767	2.278	0.6987	0.4847
19	rs1354774	50889862	4	GENO_2DF	251	NA	NA	NA	NA	1.891	0.3885
19	rs2659122	51363026	3	ADD	242	0.7517	0.3325	0.3918	1.442	-0.8583	0.3907
19	rs2659122	51363026	3	DOMDEV	242	0.915	0.4193	0.4022	2.081	-0.2119	0.8322
19	rs2659122	51363026	3	C3	242	1.172	0.3109	0.6371	2.155	0.51	0.6101
19	rs2659122	51363026	3	GENO_2DF	242	NA	NA	NA	NA	1.748	0.4172
19	rs1506684	51371419	2	ADD	241	1.221	0.2155	0.8005	1.863	0.9274	0.3537
19	rs1506684	51371419	2	DOMDEV	241	1.202	0.3077	0.6577	2.197	0.5983	0.5496
19	rs1506684	51371419	2	C3	241	1.213	0.3105	0.66	2.229	0.6218	0.5341
19	rs1506684	51371419	2	GENO_2DF	241	NA	NA	NA	NA	1.317	0.5175
20	rs3918256	44640959	3	ADD	246	0.5266	0.2894	0.2986	0.9287	-2.216	0.02672
20	rs3918256	44640959	3	DOMDEV	246	1.823	0.3605	0.8995	3.696	1.666	0.09566
20	rs3918256	44640959	3	C3	246	1.241	0.3122	0.6729	2.288	0.6913	0.4894
20	rs3918256	44640959	3	GENO_2DF	246	NA	NA	NA	NA	5.273	0.07162
20	rs3787268	46013092	1	ADD	118	1.002	0.4313	0.4304	2.334	0.005071	0.996
20	rs3787268	46013092	1	DOMDEV	118	0.7233	0.627	0.2117	2.471	-0.5168	0.6053
20	rs3787268	46013092	1	C3	118	1.323	0.4462	0.5516	3.171	0.6267	0.5309
20	rs3787268	46013092	1	GENO_2DF	118	NA	NA	NA	NA	0.3784	0.8276
20	rs3787557	52783135	4	ADD	242	4.669e-05	12190	0	inf	-0.0008181	0.9993
20	rs3787557	52783135	4	DOMDEV	242	18540	12190	0	inf	0.0008063	0.9994
20	rs3787557	52783135	4	C3	242	1.191	0.3093	0.6495	2.183	0.5646	0.5723
20	rs3787557	52783135	4	GENO_2DF	242	NA	NA	NA	NA	0.1617	0.9223
20	rs2762939	54164712	4	ADD	248	0.529	0.5304	0.1871	1.496	-1.2	0.23
20	rs2762939	54164712	4	DOMDEV	248	1.914	0.5827	0.6108	5.995	1.114	0.2654
20	rs2762939	54164712	4	C3	248	1.23	0.3119	0.6675	2.267	0.6642	0.5066
20	rs2762939	54164712	4	GENO_2DF	248	NA	NA	NA	NA	1.476	0.4782
20	rs2296241	54169680	3	ADD	240	1.117	0.227	0.7161	1.743	0.4884	0.6253
20	rs2296241	54169680	3	DOMDEV	240	1.23	0.3103	0.6693	2.259	0.6659	0.5055
20	rs2296241	54169680	3	C3	240	1.14	0.3172	0.6121	2.123	0.4128	0.6798
20	rs2296241	54169680	3	GENO_2DF	240	NA	NA	NA	NA	0.673	0.7143
22	rs5759167	43104206	2	ADD	92	1.086	0.3192	0.5808	2.029	0.2576	0.7967
22	rs5759167	43104206	2	DOMDEV	92	1.449	0.4834	0.562	3.739	0.7678	0.4426
22	rs5759167	43104206	2	C3	92	1.415	0.4786	0.554	3.616	0.7259	0.4679
22	rs5759167	43104206	2	GENO_2DF	92	NA	NA	NA	NA	0.6844	0.7102
23	rs5945619	51498820	4	ADD	242	NA	NA	NA	NA	NA	NA
23	rs5945619	51498820	4	DOMDEV	242	NA	NA	NA	NA	NA	NA
23	rs5945619	51498820	4	C3	242	NA	NA	NA	NA	NA	NA
23	rs5945619	51498820	4	GENO_2DF	242	NA	NA	NA	NA	NA	NA
23	rs5919432	67801708	4	ADD	244	NA	NA	NA	NA	NA	NA
23	rs5919432	67801708	4	DOMDEV	244	NA	NA	NA	NA	NA	NA
23	rs5919432	67801708	4	C3	244	NA	NA	NA	NA	NA	NA
23	rs5919432	67801708	4	GENO_2DF	244	NA	NA	NA	NA	NA	NA

## Sheet: Smoke_Agg_vs_NAgg_Adjusted
CHR	SNP	UNADJ	GC	BONF	HOLM	SIDAK_SS	SIDAK_SD	FDR_BH	FDR_BY
2	rs632148	0.01361	0.01361	1	1	0.7425	0.7425	0.8731	1
20	rs3918256	0.02672	0.02672	1	1	0.9315	0.9297	0.8731	1
7	rs10244329	0.02697	0.02697	1	1	0.9333	0.9297	0.8731	1
7	rs3735035	0.03528	0.03528	1	1	0.9714	0.9682	0.8731	1
17	rs8066956	0.06096	0.06096	1	1	0.998	0.9975	1	1
11	rs10896438	0.06644	0.06644	1	1	0.9989	0.9984	1	1
19	rs713041	0.08082	0.08082	1	1	0.9998	0.9996	1	1
10	rs4962416	0.09179	0.09179	1	1	0.9999	0.9999	1	1
8	rs2294008	0.1197	0.1197	1	1	1	1	1	1
8	rs6983267	0.159	0.159	1	1	1	1	1	1
15	rs4965373	0.1604	0.1604	1	1	1	1	1	1
10	rs10740051	0.1624	0.1624	1	1	1	1	1	1
16	rs9939609	0.1745	0.1745	1	1	1	1	1	1
8	rs6470494	0.2089	0.2089	1	1	1	1	1	1
20	rs2762939	0.23	0.23	1	1	1	1	1	1
19	rs1354774	0.234	0.234	1	1	1	1	1	1
17	rs983085	0.2421	0.2421	1	1	1	1	1	1
6	rs130067	0.2426	0.2426	1	1	1	1	1	1
16	rs1529916	0.2482	0.2482	1	1	1	1	1	1
11	rs7931342	0.2714	0.2714	1	1	1	1	1	1
19	rs887391	0.2757	0.2757	1	1	1	1	1	1
11	rs1001179	0.3041	0.3041	1	1	1	1	1	1
12	rs2071358	0.3197	0.3197	1	1	1	1	1	1
11	rs594519	0.3391	0.3391	1	1	1	1	1	1
11	rs7127900	0.3438	0.3438	1	1	1	1	1	1
17	rs799923	0.3478	0.3478	1	1	1	1	1	1
3	rs1050450	0.3534	0.3534	1	1	1	1	1	1
19	rs1506684	0.3537	0.3537	1	1	1	1	1	1
11	rs11228565	0.3567	0.3567	1	1	1	1	1	1
4	rs12500426	0.3721	0.3721	1	1	1	1	1	1
17	rs1859962	0.377	0.377	1	1	1	1	1	1
17	rs4794758	0.3839	0.3839	1	1	1	1	1	1
19	rs2659122	0.3907	0.3907	1	1	1	1	1	1
5	rs2242652	0.4065	0.4065	1	1	1	1	1	1
4	rs17021918	0.4343	0.4343	1	1	1	1	1	1
5	rs3733890	0.4587	0.4587	1	1	1	1	1	1
5	rs2121875	0.4617	0.4617	1	1	1	1	1	1
8	rs2928679	0.4823	0.4823	1	1	1	1	1	1
12	rs7299460	0.5012	0.5012	1	1	1	1	1	1
11	rs174448	0.5216	0.5216	1	1	1	1	1	1
4	rs7679673	0.5387	0.5387	1	1	1	1	1	1
4	rs629242	0.5502	0.5502	1	1	1	1	1	1
17	rs1016990	0.5692	0.5692	1	1	1	1	1	1
3	rs6763931	0.5703	0.5703	1	1	1	1	1	1
2	rs2710647	0.5864	0.5864	1	1	1	1	1	1
12	rs3782905	0.6084	0.6084	1	1	1	1	1	1
7	rs12155172	0.6119	0.6119	1	1	1	1	1	1
20	rs2296241	0.6253	0.6253	1	1	1	1	1	1
1	rs1380576	0.6269	0.6269	1	1	1	1	1	1
5	rs3877899	0.6446	0.6446	1	1	1	1	1	1
3	rs4135275	0.6493	0.6493	1	1	1	1	1	1
10	rs6162	0.6551	0.6551	1	1	1	1	1	1
3	rs1799977	0.6777	0.6777	1	1	1	1	1	1
17	rs1127678	0.6781	0.6781	1	1	1	1	1	1
10	rs7920517	0.6886	0.6886	1	1	1	1	1	1
8	rs13254738	0.697	0.697	1	1	1	1	1	1
10	rs12529	0.7029	0.7029	1	1	1	1	1	1
17	rs11545302	0.7123	0.7123	1	1	1	1	1	1
8	rs6470517	0.7192	0.7192	1	1	1	1	1	1
3	rs10934853	0.7198	0.7198	1	1	1	1	1	1
7	rs10486567	0.7284	0.7284	1	1	1	1	1	1
12	rs10875943	0.7303	0.7303	1	1	1	1	1	1
8	rs16902094	0.7309	0.7309	1	1	1	1	1	1
1	rs12042763	0.7353	0.7353	1	1	1	1	1	1
17	rs6502051	0.7359	0.7359	1	1	1	1	1	1
19	rs8102476	0.7533	0.7533	1	1	1	1	1	1
8	rs1512268	0.7667	0.7667	1	1	1	1	1	1
8	rs7000448	0.7695	0.7695	1	1	1	1	1	1
12	rs2946834	0.7936	0.7936	1	1	1	1	1	1
22	rs5759167	0.7967	0.7967	1	1	1	1	1	1
12	rs6823	0.802	0.802	1	1	1	1	1	1
17	rs3094509	0.8124	0.8124	1	1	1	1	1	1
7	rs6465657	0.8207	0.8207	1	1	1	1	1	1
6	rs4880	0.8365	0.8365	1	1	1	1	1	1
12	rs2279744	0.848	0.848	1	1	1	1	1	1
17	rs4054823	0.8678	0.8678	1	1	1	1	1	1
1	rs5845	0.868	0.868	1	1	1	1	1	1
12	rs902774	0.8811	0.8811	1	1	1	1	1	1
2	rs10187424	0.9021	0.9021	1	1	1	1	1	1
2	rs1465618	0.9056	0.9056	1	1	1	1	1	1
19	rs2659056	0.9711	0.9711	1	1	1	1	1	1
20	rs3787268	0.996	0.996	1	1	1	1	1	1
2	rs2292884	0.9975	0.9975	1	1	1	1	1	1
8	rs1016343	0.9977	0.9977	1	1	1	1	1	1
2	rs721048	0.9979	0.9979	1	1	1	1	1	1
9	rs11536889	0.9985	0.9985	1	1	1	1	1	1
11	rs2727270	0.9989	0.9989	1	1	1	1	1	1
15	rs28665122	0.9991	0.9991	1	1	1	1	1	1
3	rs17793693	0.9993	0.9993	1	1	1	1	1	1
2	rs12621278	0.9993	0.9993	1	1	1	1	1	1
19	rs17632542	0.9993	0.9993	1	1	1	1	1	1
8	rs6983561	0.9993	0.9993	1	1	1	1	1	1
20	rs3787557	0.9993	0.9993	1	1	1	1	1	1
17	rs17552022	0.9993	0.9993	1	1	1	1	1	1
2	rs1056827	0.9993	0.9993	1	1	1	1	1	1
8	rs1378897	1	1	1	1	1	1	1	1
12	rs7965399	1	1	1	1	1	1	1	1
23	rs5945619	1	1	1	1	1	1	1	1
23	rs5919432	1	1	1	1	1	1	1	1

[truncated: 26 more sheets: Smoke_NAgg_vs_Control_OR, Smoke_NAgg_vs_Control_Adjusted, Alc_Agg_vs_Control_OR, Alc_Agg_vs_Control_Adjusted, Alc_Agg_vs_NAgg_OR, Alc_Agg_vs_NAgg_Adjusted, Alc_NAgg_vs_Control_OR, Alc_NAgg_vs_Control_Adjusted, BMI_Age_Agg_vs_Control_OR, BMI_Age_Agg_vs_Control_Adjusted, BMI_Age_Agg_vs_NAgg_OR, BMI_Age_Agg_vs_NAgg_Adjusted, BMI_Age_NAgg_vs_Control_OR, BMI_Age_NAgg_vs_Contro_Adjusted, Smoke_Age_Agg_vs_Control_OR, Smoke_Age_Agg_vs_Cont_Adjusted, Smoke_Age_Agg_vs_NAgg_OR, Smoke_Age_Agg_vs_NAgg_Adjusted, Smoke_Age_NAgg_vs_Control_OR, Smoke_Age_NAgg_vs_Control_Adjus …]
